# Supplementary material
Source: publisher figshare collection journal article supplement (https://gsapubs.figshare.com/articles/dataset/_/12542978)
Supplement: Supplementary file 1 [file 1]

## Sheet: Sample Location
GSA Data Repository Item 2020202 accompanies Sierra-Rojas, M.I., Lawton, T.F., Martens, U., von Quadt, A., Beltran Triviño, A.,
Coombs, H., and Stockli, D.F., 2020, Early Cretaceous to Paleogene sandstone provenance and sediment-dispersal systems of the Cuicateco
terrane, Mexico, in Martens, U., and Molina Garza, R.S., eds., Southern and Central Mexico: Basement Framework, Tectonic Evolution, and
Provenance of Mesozoic–Cenozoic Basins: Geological Society of America Special Paper 546,,https://doi.org/10.1130/2020.2546(10).
Appendix DR2
Sample	Sample code	Latitud	Longitud	Datum	Analysis
Ch1	12Sept16-1	18.2849	-97.0689	WGS84	DZ
Ch2	10-18-11-2A	18.1712	-97.0359	WGS84	DZ
Ch3	10-18-11-1B	18.1819	-97.0312	WGS84	DZ
Ch4	10-18-11-5B	18.1932	-97.0191	WGS84	DZ
Ch5	26Feb16-2	17.109	-96.6389	WGS84	DZ
Ch6	26Feb16-3	17.1742	-96.6043	WGS84	DZ
Tec1	18Apr16-3A	18.7527	-97.2173	WGS84	DZ
Tec2	18Apr16-4C	18.7519	-97.2081	WGS84	DZ
Tec3	15Apr16-4E	18.0524	-96.7609	WGS84	DZ
Men1	12-12-10-2C	18.6993	-97.0645	WGS84	DZ
Men2	15Apr16-8B	18.0442	-96.5782	WGS84	DZ
Vel1	16Apr16-3B	18.5272	-96.8083	WGS84	DZ
Vel2	15Apr16-5G	18.0464	-96.7148	WGS84	DZ
Vel3	15Apr16-11B	18.0787	-96.532	WGS84	DZ

## Sheet: Ch1
Analysis	Ratio 207Pb/235U	Error2S	Ratio 206Pb/238U	Error2S	rho	Ratio 238U/206Pb	Error2S	Ratio 207Pb/206Pb	Error2S	207Pb/235Pb Age (Ma)	Error2S	206Pb/238U Age (Ma)	Error2S	207Pb/206Pb Age (Ma)	Error2S	Prefered Age	Unc 2S	% disc. (6/8-7/5)	% Error 6/8 2S	Th/U
120916_1B_126.FIN2	0.286	0.015	0.03837	0.00074	-0.027228	26.062	0.50263	0.0544	0.003	253	12	242.6	4.6	310	110	242.6	4.6	0.0428689	0.0189613	0.205366
120916_1B_111.FIN2	0.294	0.0082	0.03935	0.00054	-0.087502	25.413	0.348742	0.0535	0.0017	261.1	6.5	248.8	3.3	325	68	248.8	3.3	0.0494373	0.0132637	0.854481
120916_1B_73.FIN2	0.291	0.016	0.0396	0.0012	0.41232	25.2525	0.765228	0.0533	0.003	259	13	250.5	7.7	320	120	250.5	7.7	0.0339321	0.0307385	0.72973
120916_1B_124.FIN2	0.2997	0.0089	0.03971	0.00058	0.16949	25.1826	0.367814	0.0547	0.0016	265.8	7	251	3.6	385	64	251	3.6	0.0589641	0.0143426	0.601227
120916_1B_32.FIN2	0.2902	0.0058	0.0399	0.00043	0.41843	25.0627	0.270099	0.053	0.0011	258.5	4.5	252.2	2.6	318	45	252.2	2.6	0.0249802	0.0103093	0.541475
120916_1B_66.FIN2	0.2831	0.0047	0.03993	0.00033	0.19709	25.0438	0.206974	0.05066	0.00083	252.9	3.7	252.4	2	221	37	252.4	2	0.00198098	0.00792393	0.189431
120916_1B_53.FIN2	0.289	0.012	0.04013	0.00076	0.18572	24.919	0.471927	0.052	0.0022	257.3	9.4	253.6	4.7	262	87	253.6	4.7	0.0145899	0.0185331	1.33495
120916_1B_80.FIN2	0.2939	0.0051	0.0403	0.00035	0.22635	24.8139	0.215505	0.05253	0.0009	261.8	4.1	254.7	2.2	304	39	254.7	2.2	0.0278759	0.00863761	1.44155
120916_1B_115.FIN2	0.2954	0.0073	0.0403	0.00046	0.19498	24.8139	0.283236	0.0521	0.0012	262.2	5.7	254.7	2.9	277	50	254.7	2.9	0.0294464	0.0113859	1.01504
120916_1B_83.FIN2	0.2891	0.0075	0.04035	0.0005	0.36368	24.7831	0.307102	0.052	0.0013	257.2	5.9	255	3.1	273	53	255	3.1	0.00862745	0.0121569	0.985185
120916_1B_107.FIN2	0.3026	0.0062	0.04045	0.00036	0.26807	24.7219	0.220022	0.0539	0.0011	268	4.9	255.6	2.3	350	46	255.6	2.3	0.0485133	0.00899844	1.07726
120916_1B_57.FIN2	0.3066	0.0084	0.04058	0.00048	0.18814	24.6427	0.291486	0.0543	0.0015	270.7	6.5	256.4	3	356	57	256.4	3	0.0557722	0.0117005	0.998874
120916_1B_34.FIN2	0.2953	0.0055	0.04059	0.00036	-0.01327	24.6366	0.218507	0.0531	0.001	262.4	4.3	256.5	2.2	319	43	256.5	2.2	0.0230019	0.008577	1.21295
120916_1B_30.FIN2	0.2933	0.0064	0.04063	0.00035	0.38089	24.6124	0.212019	0.0524	0.0011	260.7	5	256.7	2.2	289	44	256.7	2.2	0.0155824	0.00857032	0.685276
120916_1B_24.FIN2	0.3055	0.0098	0.04065	0.00082	0.26572	24.6002	0.496241	0.0541	0.0018	270.3	7.6	256.8	5.1	359	73	256.8	5.1	0.0525701	0.0198598	0.84141
120916_1B_104.FIN2	0.3001	0.0058	0.04073	0.00035	0.25639	24.5519	0.210979	0.0534	0.001	266.1	4.5	257.3	2.2	331	43	257.3	2.2	0.0342013	0.00855033	0.941844
120916_1B_70.FIN2	0.3007	0.0052	0.04085	0.00036	0.22098	24.4798	0.215734	0.05276	0.00093	266.6	4.1	258.1	2.2	309	39	258.1	2.2	0.032933	0.00852383	1.20743
120916_1B_29.FIN2	0.295	0.0053	0.04099	0.0004	0.36219	24.3962	0.23807	0.05224	0.00092	262.2	4.2	258.9	2.5	283	38	258.9	2.5	0.0127462	0.00965624	1.26098
120916_1B_117.FIN2	0.308	0.012	0.04107	0.00095	0.41688	24.3487	0.563215	0.0537	0.0019	271.8	9	259.4	5.9	340	79	259.4	5.9	0.0478026	0.0227448	0.297653
120916_1B_60.FIN2	0.3028	0.0064	0.04106	0.00041	0.13949	24.3546	0.24319	0.053	0.0012	268.7	5.1	259.4	2.6	317	48	259.4	2.6	0.035852	0.0100231	1.3758
120916_1B_21.FIN2	0.3061	0.0089	0.04106	0.00051	0.095218	24.3546	0.302505	0.0533	0.0016	270.5	6.9	259.4	3.2	314	65	259.4	3.2	0.0427911	0.0123362	0.741477
120916_1B_12.FIN2	0.3043	0.0068	0.04108	0.00052	0.14573	24.3427	0.308136	0.053	0.0012	269.5	5.3	259.5	3.2	322	52	259.5	3.2	0.0385356	0.0123314	0.931385
120916_1B_116.FIN2	0.3008	0.0066	0.04109	0.0006	0.32375	24.3368	0.355369	0.0524	0.0012	266.6	5.2	259.6	3.7	284	49	259.6	3.7	0.0269646	0.0142527	1.01538
120916_1B_72.FIN2	0.3048	0.0078	0.04109	0.0004	0.13857	24.3368	0.236912	0.0533	0.0014	269.4	6.1	259.6	2.5	316	57	259.6	2.5	0.0377504	0.0096302	0.885809
120916_1B_127.FIN2	0.3186	0.006	0.04108	0.00041	0.41505	24.3427	0.242953	0.05578	0.00094	280.4	4.6	259.8	2.6	433	38	259.8	2.6	0.0792918	0.0100077	1.29412
120916_1B_25.FIN2	0.295	0.01	0.04114	0.00056	-0.041077	24.3072	0.330872	0.0519	0.002	261.7	8.1	259.9	3.5	252	76	259.9	3.5	0.00692574	0.0134667	0.697456
120916_1B_92.FIN2	0.304	0.016	0.0412	0.0015	-0.20774	24.2718	0.883684	0.0544	0.0037	269	13	260	9.4	360	150	260	9.4	0.0346154	0.0361538	1.14407
120916_1B_85.FIN2	0.2968	0.0078	0.04118	0.00047	0.076602	24.2836	0.277157	0.0521	0.0014	264	6.3	260.1	2.9	284	57	260.1	2.9	0.0149942	0.0111496	1.13463
120916_1B_77.FIN2	0.3	0.012	0.04117	0.00054	0.012513	24.2895	0.31859	0.0523	0.0021	265.2	9	260.1	3.3	271	82	260.1	3.3	0.0196078	0.0126874	0.620838
120916_1B_71.FIN2	0.3016	0.0058	0.04122	0.00051	0.19666	24.2601	0.300161	0.053	0.0011	267.9	4.7	260.4	3.2	312	43	260.4	3.2	0.0288018	0.0122888	1.1158
120916_1B_46.FIN2	0.311	0.012	0.04126	0.00085	0.36379	24.2365	0.499299	0.0545	0.0019	274.7	9.1	260.6	5.2	381	77	260.6	5.2	0.0541059	0.019954	1.23883
120916_1B_40.FIN2	0.2976	0.005	0.04137	0.00037	0.26077	24.1721	0.216188	0.05283	0.00089	264.3	3.9	261.3	2.3	308	37	261.3	2.3	0.0114811	0.00880214	1.55466
120916_1B_51.FIN2	0.314	0.012	0.04138	0.00068	0.21971	24.1663	0.397126	0.0547	0.0022	276.5	9.5	261.4	4.2	377	88	261.4	4.2	0.0577659	0.0160673	1.44282
120916_1B_36.FIN2	0.2929	0.0053	0.04145	0.00038	0.24451	24.1255	0.221174	0.05194	0.00092	260.5	4.2	261.8	2.3	265	40	261.8	2.3	-0.00496562	0.00878533	1.2121
120916_1B_41.FIN2	0.305	0.017	0.04147	0.00064	-0.14281	24.1138	0.372145	0.054	0.0026	269	12	261.9	4	329	91	261.9	4	0.0271096	0.015273	0.844086
120916_1B_114.FIN2	0.305	0.0087	0.04149	0.00063	0.1233	24.1022	0.365977	0.0529	0.0016	269.5	6.7	262	3.9	298	64	262	3.9	0.028626	0.0148855	0.859241
120916_1B_13.FIN2	0.2998	0.0059	0.04151	0.00046	0.32402	24.0906	0.266964	0.0518	0.001	266.4	4.7	262.2	2.9	260	44	262.2	2.9	0.0160183	0.0110603	1.0492
120916_1B_75.FIN2	0.3116	0.0082	0.04157	0.00079	0.6698	24.0558	0.457159	0.054	0.0011	275.1	6.3	262.5	4.9	363	44	262.5	4.9	0.048	0.0186667	1
120916_1B_64.FIN2	0.316	0.01	0.04157	0.00055	0.098495	24.0558	0.318275	0.0544	0.0018	277.6	7.7	262.5	3.4	366	73	262.5	3.4	0.0575238	0.0129524	0.73342
120916_1B_49.FIN2	0.2986	0.0051	0.04164	0.00039	0.15559	24.0154	0.224928	0.05187	0.0009	265	4	263	2.4	275	39	263	2.4	0.00760456	0.00912548	1.23077
120916_1B_63.FIN2	0.322	0.014	0.04166	0.00077	0.19421	24.0038	0.443662	0.0554	0.0024	283	11	263.1	4.8	407	95	263.1	4.8	0.0756366	0.018244	0.958124
120916_1B_61.FIN2	0.314	0.014	0.04167	0.00088	0.055909	23.9981	0.506799	0.0541	0.0026	277	11	263.2	5.5	350	100	263.2	5.5	0.0524316	0.0208967	0.938679
120916_1B_101.FIN2	0.312	0.01	0.0417	0.001	0.28398	23.9808	0.57508	0.0545	0.0018	275.6	7.9	263.3	6.5	367	71	263.3	6.5	0.0467148	0.0246867	0.297561
120916_1B_74.FIN2	0.3018	0.0057	0.04173	0.00037	0.21478	23.9636	0.212474	0.05192	0.00092	267.4	4.4	263.5	2.3	269	39	263.5	2.3	0.0148008	0.00872865	1.12083
120916_1B_18.FIN2	0.3187	0.0075	0.04177	0.00045	0.31141	23.9406	0.257919	0.0546	0.0012	280.5	5.8	263.8	2.8	378	51	263.8	2.8	0.0633055	0.0106141	1.60277
120916_1B_27.FIN2	0.3066	0.0086	0.04181	0.00047	0.15912	23.9177	0.268867	0.0531	0.0015	270.7	6.7	264	2.9	308	59	264	2.9	0.0253788	0.0109848	1.04223
120916_1B_84.FIN2	0.2988	0.0059	0.04183	0.00045	0.21412	23.9063	0.25718	0.0518	0.001	265	4.6	264.1	2.8	267	43	264.1	2.8	0.0034078	0.010602	0.627059
120916_1B_14.FIN2	0.3126	0.0067	0.04189	0.0004	0.10654	23.872	0.22795	0.0537	0.0012	276.4	5.3	264.5	2.5	337	49	264.5	2.5	0.0449905	0.0094518	0.955128
120916_1B_62.FIN2	0.3051	0.0079	0.04199	0.00053	0.12776	23.8152	0.300597	0.052	0.0014	269.9	6.2	265.1	3.3	271	59	265.1	3.3	0.0181064	0.0124481	1.35172
120916_1B_105.FIN2	0.3027	0.0076	0.042	0.0004	0.044937	23.8095	0.226757	0.0521	0.0013	267.9	5.9	265.2	2.5	271	53	265.2	2.5	0.010181	0.00942685	0.92062
120916_1B_133.FIN2	0.3055	0.0051	0.04201	0.00043	0.25233	23.8039	0.243648	0.05304	0.00084	270.5	3.9	265.3	2.7	323	36	265.3	2.7	0.0196005	0.0101772	1.33688
120916_1B_16.FIN2	0.2968	0.0065	0.04203	0.0004	0.29986	23.7925	0.226434	0.0505	0.0011	263.4	5.1	265.4	2.5	213	45	265.4	2.5	-0.0075358	0.00941974	1.12807
120916_1B_87.FIN2	0.3234	0.005	0.04216	0.00048	0.46767	23.7192	0.270047	0.05589	0.0008	284.3	3.9	266.2	3	440	33	266.2	3	0.067994	0.0112697	1.28076
120916_1B_8.FIN2	0.3102	0.007	0.04233	0.00047	0.3231	23.6239	0.262302	0.0528	0.0011	274	5.4	267.2	2.9	309	47	267.2	2.9	0.0254491	0.0108533	1.06709
120916_1B_149.FIN2	0.302	0.01	0.04238	0.00059	0.079825	23.596	0.328496	0.0526	0.0019	268.2	8.1	267.5	3.6	275	71	267.5	3.6	0.00261682	0.0134579	0.283945
120916_1B_37.FIN2	0.3136	0.0072	0.04244	0.00042	0.086099	23.5627	0.233184	0.0543	0.0013	276.4	5.5	267.9	2.6	358	50	267.9	2.6	0.0317283	0.00970511	1.41528
120916_1B_6.FIN2	0.3067	0.0075	0.04244	0.00044	0.20746	23.5627	0.244288	0.0522	0.0013	271	5.8	267.9	2.7	281	53	267.9	2.7	0.0115715	0.0100784	0.505315
120916_1B_125.FIN2	0.3122	0.0072	0.0426	0.00043	0.33045	23.4742	0.236946	0.0527	0.0011	275.3	5.5	268.9	2.7	298	47	268.9	2.7	0.0238007	0.0100409	0.973712
120916_1B_139.FIN2	0.3066	0.0037	0.04263	0.00032	0.21992	23.4577	0.176084	0.05274	0.00064	271.4	2.8	269.1	2	310	28	269.1	2	0.00854701	0.00743218	0.521411
120916_1B_143.FIN2	0.3147	0.009	0.04267	0.00045	0.18987	23.4357	0.247154	0.0542	0.0015	276.9	6.9	269.4	2.8	349	57	269.4	2.8	0.0278396	0.0103935	0.799754
120916_1B_137.FIN2	0.3124	0.0098	0.04273	0.00057	0.11405	23.4028	0.312183	0.0535	0.0017	275	7.6	269.7	3.5	319	66	269.7	3.5	0.0196515	0.0129774	0.634441
120916_1B_7.FIN2	0.319	0.017	0.0428	0.0011	0.20409	23.3645	0.600489	0.0547	0.0033	280	13	270.1	6.7	360	120	270.1	6.7	0.0366531	0.0248056	0.775915
120916_1B_147.FIN2	0.31	0.0057	0.04282	0.00044	0.34528	23.3536	0.239971	0.05297	0.00093	273.8	4.4	270.2	2.7	317	39	270.2	2.7	0.0133235	0.0099926	1.27059
120916_1B_144.FIN2	0.3085	0.006	0.04346	0.00041	0.14697	23.0097	0.217072	0.0522	0.0011	272.6	4.6	274.2	2.6	279	44	274.2	2.6	-0.00583516	0.00948213	1.27983
120916_1B_130.FIN2	0.3402	0.0079	0.04383	0.00045	0.23862	22.8154	0.234245	0.0565	0.0012	296.7	6	276.5	2.8	451	48	276.5	2.8	0.0730561	0.0101266	1.12144
120916_1B_52.FIN2	0.3223	0.007	0.04394	0.00044	0.32316	22.7583	0.227894	0.053	0.0011	283.3	5.4	277.2	2.7	316	47	277.2	2.7	0.0220058	0.00974026	0.88284
120916_1B_54.FIN2	0.329	0.022	0.0441	0.0012	0.23002	22.6757	0.617027	0.0537	0.0034	287	17	277.9	7.3	320	130	277.9	7.3	0.0327456	0.0262684	0.663082
120916_1B_120.FIN2	0.3292	0.0072	0.04416	0.0006	0.40502	22.6449	0.307676	0.0533	0.0011	288.4	5.5	278.5	3.7	326	44	278.5	3.7	0.0355476	0.0132855	0.747826
120916_1B_3.FIN2	0.3157	0.0057	0.04412	0.00039	0.10379	22.6655	0.200352	0.0519	0.001	278.3	4.4	278.6	2.5	266	42	278.6	2.5	-0.00107681	0.00897344	1.30944
120916_1B_145.FIN2	0.3178	0.0077	0.04441	0.00055	0.20446	22.5175	0.27887	0.0526	0.0013	280.3	5.7	280.1	3.4	294	52	280.1	3.4	0.000714031	0.0121385	0.441509
120916_1B_141.FIN2	0.315	0.0064	0.04448	0.00053	0.40011	22.482	0.267884	0.052	0.001	277.6	4.9	280.5	3.3	270	42	280.5	3.3	-0.0103387	0.0117647	1.26358
120916_1B_148.FIN2	0.3109	0.0089	0.0447	0.00068	0.27582	22.3714	0.340325	0.051	0.0014	274	6.9	281.9	4.2	222	57	281.9	4.2	-0.0280241	0.0148989	0.853383
120916_1B_5.FIN2	0.3273	0.0072	0.04571	0.00072	0.38164	21.8771	0.344596	0.052	0.0011	286.9	5.5	288.1	4.4	271	47	288.1	4.4	-0.00416522	0.0152725	1.24913
120916_1B_128.FIN2	0.352	0.0082	0.04575	0.00052	0.34791	21.8579	0.24844	0.0554	0.0011	305.5	6.1	288.3	3.2	422	47	288.3	3.2	0.0596601	0.0110995	0.994553
120916_1B_99.FIN2	0.65	0.01	0.0833	0.0013	0.54558	12.0048	0.18735	0.05711	0.00091	508.5	6.6	515.7	8	481	35	515.7	8	-0.0139616	0.0155129	0.698885
120916_1B_47.FIN2	0.69	0.024	0.0849	0.0029	0.57763	11.7786	0.40233	0.0597	0.0019	532	14	525	17	577	69	525	17	0.0133333	0.032381	0.234568
120916_1B_24.FIN2	0.711	0.02	0.0856	0.0017	0.26198	11.6822	0.232007	0.0597	0.0018	545	12	529	10	576	67	529	10	0.0302457	0.0189036	0.811301
120916_1B_133.FIN2	0.736	0.046	0.0873	0.0033	0.4407	11.4548	0.432998	0.0613	0.0033	560	27	540	20	640	120	540	20	0.037037	0.037037	0.126859
120916_1B_81.FIN2	0.792	0.011	0.09387	0.00095	0.53862	10.653	0.107813	0.06101	0.00073	592.3	6.5	578.3	5.6	635	27	578.3	5.6	0.0242089	0.00968356	0.192308
120916_1B_47.FIN2	0.973	0.04	0.1145	0.0034	0.70617	8.73362	0.259339	0.0619	0.0017	686	20	698	19	649	58	698	19	-0.017192	0.0272206	0.473913
120916_1B_44.FIN2	1.245	0.053	0.1297	0.0024	0.052004	7.7101	0.14267	0.0702	0.0032	818	24	786	13	897	98	786	13	0.0407125	0.0165394	0.654479
120916_1B_98.FIN2	1.42	0.026	0.149	0.0026	0.37133	6.71141	0.117112	0.0701	0.0014	897	11	895	14	925	40	925	40	0.00223464	0.0432432	0.166667
120916_1B_129.FIN2	1.537	0.018	0.157	0.0019	0.79606	6.36943	0.0770822	0.07086	0.00052	945.2	7.2	940	10	955	15	955	15	0.00553191	0.0157068	0.0255408
120916_1B_102.FIN2	1.487	0.021	0.1499	0.002	0.70301	6.67111	0.0890075	0.07195	0.00077	923.6	8.7	900	11	979	22	979	22	0.0262222	0.0224719	0.395118
120916_1B_9.FIN2	1.627	0.037	0.1605	0.0022	0.48173	6.23053	0.0854029	0.0727	0.0014	977	14	959	12	992	41	992	41	0.0187696	0.0413306	0.141392
120916_1B_94.FIN2	1.601	0.02	0.1607	0.0012	0.52968	6.22278	0.0464675	0.07254	0.00078	969.9	7.7	960.6	6.8	998	22	998	22	0.00968145	0.0220441	0.0812844
120916_1B_108.FIN2	1.527	0.025	0.1505	0.0016	0.33451	6.64452	0.0706394	0.0729	0.0012	939	10	903.6	8.8	998	33	998	33	0.0391766	0.0330661	0.53567
120916_1B_95.FIN2	1.61	0.016	0.16105	0.00091	0.53119	6.20925	0.0350849	0.07318	0.00061	974.1	5.9	962.5	5	1015	17	1015	17	0.0120519	0.0167488	0.390132
120916_1B_142.FIN2	1.611	0.013	0.1614	0.0013	0.41186	6.19579	0.0499041	0.07337	0.00059	973.9	5.2	964.1	7.1	1021	16	1021	16	0.0101649	0.0156709	0.549014
120916_1B_89.FIN2	1.585	0.016	0.1572	0.0014	0.53793	6.36132	0.056653	0.07342	0.00067	963.7	6.3	941.1	8	1023	19	1023	19	0.0240145	0.0185728	0.747467
120916_1B_86.FIN2	1.587	0.02	0.1575	0.0016	0.80978	6.34921	0.0644999	0.07341	0.00053	964.8	7.8	942.4	8.9	1024	15	1024	15	0.0237691	0.0146484	0.26087
120916_1B_134.FIN2	1.577	0.017	0.1566	0.0012	0.67424	6.3857	0.0489325	0.07366	0.00059	960.5	6.9	937.5	6.7	1029	16	1029	16	0.0245333	0.0155491	0.755663
120916_1B_78.FIN2	1.564	0.02	0.1522	0.0014	0.52881	6.5703	0.0604364	0.07406	0.00081	955.9	8	913.2	7.7	1042	22	1042	22	0.0467587	0.0211132	0.613607
120916_1B_91.FIN2	1.661	0.032	0.1623	0.0021	0.58923	6.16143	0.0797227	0.0749	0.0012	991	12	969	11	1055	31	1055	31	0.0227038	0.0293839	0.625364
120916_1B_140.FIN2	1.661	0.021	0.1619	0.0016	0.55439	6.17665	0.0610417	0.07547	0.00084	992.8	8.1	966.9	8.7	1079	22	1079	22	0.0267866	0.0203892	0.294798
120916_1B_136.FIN2	1.675	0.02	0.1612	0.0015	0.44185	6.20347	0.0577246	0.07618	0.00077	997.9	7.4	963.3	8.5	1095	20	1095	20	0.0359182	0.0182648	0.575758
120916_1B_4.FIN2	1.858	0.029	0.1756	0.0027	0.56459	5.69476	0.0875618	0.0767	0.0011	1065	11	1042	15	1110	28	1110	28	0.0220729	0.0252252	0.690638
120916_1B_35.FIN2	1.907	0.019	0.1807	0.0021	0.76951	5.53403	0.0643136	0.07682	0.00055	1082.9	6.5	1071	12	1117	15	1117	15	0.0111111	0.0134288	0.110304
120916_1B_69.FIN2	1.845	0.025	0.1699	0.0017	0.3981	5.88582	0.0588928	0.0778	0.001	1060.2	9.1	1011.2	9.3	1134	27	1134	27	0.0484573	0.0238095	0.509761
120916_1B_135.FIN2	2.076	0.026	0.1925	0.002	0.70366	5.19481	0.053972	0.07858	0.00068	1139.8	8.5	1135	11	1161	18	1161	18	0.00422907	0.0155039	1.0776
120916_1B_122.FIN2	2.122	0.023	0.1908	0.0018	0.53391	5.24109	0.0494442	0.07987	0.00079	1154.8	7.3	1125.7	9.6	1189	19	1189	19	0.0258506	0.0159798	0.54012
120916_1B_82.FIN2	2.02	0.023	0.1825	0.0016	0.44398	5.47945	0.048039	0.08002	0.00089	1121.4	7.8	1080.2	9	1193	22	1193	22	0.0381411	0.0184409	0.872768
120916_1B_97.FIN2	2.017	0.026	0.1829	0.0016	0.4409	5.46747	0.0478291	0.0807	0.0011	1119.7	8.7	1082.4	8.8	1205	26	1205	26	0.0344605	0.0215768	1.96107
120916_1B_93.FIN2	1.949	0.033	0.1766	0.0022	0.57835	5.66251	0.0705409	0.0805	0.0011	1097	11	1048	12	1208	28	1208	28	0.0467557	0.0231788	0.737435
120916_1B_59.FIN2	2.049	0.019	0.1825	0.0014	0.45536	5.47945	0.0420342	0.0806	0.0007	1131.6	6.3	1080.3	7.8	1209	17	1209	17	0.0474868	0.0140612	0.859183
120916_1B_2.FIN2	2.396	0.047	0.2135	0.0032	0.63577	4.68384	0.0702028	0.0814	0.0013	1239	14	1247	17	1233	28	1233	28	-0.0064154	0.0227088	0.377647
120916_1B_132.FIN2	2.591	0.026	0.216	0.0018	0.31499	4.62963	0.0385802	0.08717	0.0009	1297.4	7.2	1260.7	9.6	1363	20	1363	20	0.0291108	0.0146735	0.680723

## Sheet: Ch2
Analysis	Ratio 207Pb/235U	Error2S	Ratio 206Pb/238U	Error2S	rho	Ratio 238U/206Pb	Error2S	Ratio 207Pb/206Pb	Error2S	207Pb/235Pb Age (Ma)	Error2S	206Pb/238U Age (Ma)	Error2S	207Pb/206Pb Age (Ma)	Error2S	Prefered Age	Unc 2S	% disc. (6/8-7/5)	% Error 6/8 2S	Th/U
Zircon_157	0.1436	0.0084	0.01977	0.00039	0.14029	50.5817	0.997818	0.054	0.0028	136.245	7.45822	126.206	2.46544	302	74	126.206	2.46544	7.95449	1.97269	0.264681
Zircon_115	0.176	0.053	0.02	0.00058	0.21093	50	1.45	0.064	0.011	164.613	45.7613	127.66	3.66573	830	100	127.66	3.66573	28.9462	2.9	0.542272
Zircon_132	0.1393	0.0078	0.02021	0.00043	0.24593	49.4805	1.05278	0.0506	0.0024	132.42	6.95163	128.987	2.71713	257	50	128.987	2.71713	2.66154	2.12766	0.418027
Zircon_151	0.141	0.01	0.02021	0.00045	0.313953	49.4805	1.10174	0.0515	0.0041	133.934	8.89906	128.987	2.84351	406	83	128.987	2.84351	3.83527	2.22662	0.31878
Zircon_149	0.1419	0.009	0.02029	0.00043	0.48918	49.2854	1.04449	0.0524	0.003	134.735	8.00284	129.493	2.71692	306	88	129.493	2.71692	4.0482	2.11927	0.464932
Zircon_112	0.151	0.012	0.02037	0.00047	0.290337	49.0918	1.1327	0.053	0.0044	142.794	10.5861	129.998	2.96943	460	100	129.998	2.96943	9.84349	2.30731	0.486829
Zircon_128	0.147	0.02	0.02056	0.00054	0.23308	48.6381	1.27746	0.0509	0.0071	139.26	17.705	131.198	3.41104	600	140	131.198	3.41104	6.1443	2.62646	0.384041
Zircon_158	0.171	0.033	0.02064	0.00055	0.138081	48.4496	1.29105	0.061	0.01	160.286	28.6146	131.704	3.47394	650	200	131.704	3.47394	21.7023	2.66473	0.384473
Zircon_124	0.151	0.024	0.02094	0.00062	0.8694	47.7555	1.41396	0.0542	0.0065	142.794	21.1722	133.598	3.91493	430	160	133.598	3.91493	6.88343	2.96084	0.406996
Zircon_113	0.169	0.019	0.02116	0.00064	0.24029	47.259	1.42938	0.0593	0.0061	158.551	16.5032	134.987	4.04034	630	130	134.987	4.04034	17.456	3.02457	0.43008
Zircon_133	0.153	0.019	0.02121	0.00064	0.32441	47.1476	1.42265	0.054	0.0056	144.557	16.7322	135.303	4.04015	436	96	135.303	4.04015	6.83969	3.01744	0.623258
Zircon_121	0.217	0.032	0.02175	0.00071	0.063678	45.977	1.50086	0.075	0.01	199.41	26.6987	138.711	4.47967	960	180	138.711	4.47967	43.7593	3.26437	0.422703
Zircon_118	0.183	0.015	0.02584	0.00062	0.292724	38.6997	0.928553	0.0506	0.004	170.639	12.8747	164.465	3.89623	323	73	164.465	3.89623	3.75393	2.39938	0.13384
Zircon_127	0.196	0.023	0.02736	0.00082	0.255403	36.5497	1.09542	0.0508	0.0061	181.736	19.5266	174.01	5.14545	650	130	174.01	5.14545	4.44005	2.99708	0.460954
Zircon_138	0.325	0.029	0.04195	0.00097	0.16206	23.8379	0.551198	0.0572	0.005	285.741	22.2235	264.917	6.00146	628	89	264.917	6.00146	7.86066	2.31228	0.743147
Zircon_152	0.327	0.025	0.0438	0.0012	0.17265	22.8311	0.625508	0.0557	0.0035	287.273	19.1293	276.353	7.41133	478	83	276.353	7.41133	3.95139	2.73973	0.955993
Zircon_145	0.354	0.078	0.0443	0.0013	0.12335	22.5734	0.662424	0.0563	0.0089	307.725	58.4933	279.44	8.0251	600	120	279.44	8.0251	10.1219	2.93454	0.457288
Zircon_141	0.382	0.019	0.0465	0.0013	0.562083	21.5054	0.601226	0.0585	0.0025	328.509	13.9597	293.007	8.00823	552	45	293.007	8.00823	12.1163	2.7957	0.216038
Zircon_114	0.454	0.031	0.0581	0.0013	0.327689	17.2117	0.385116	0.0599	0.0037	380.077	21.6485	364.072	7.92043	739	78	364.072	7.92043	4.39598	2.23752	0.971092
Zircon_111	0.499	0.04	0.0643	0.002	0.44621	15.5521	0.483736	0.0566	0.0037	411.025	27.0949	401.736	12.1143	419	70	401.736	12.1143	2.31225	3.11042	0.701779
Zircon_130	0.568	0.026	0.0738	0.0015	0.062636	13.5501	0.275409	0.0565	0.0023	456.72	16.8367	459.024	9.00534	493	49	459.024	9.00534	0.501822	2.03252	0.413904
Zircon_154	0.579	0.029	0.0746	0.0014	0.5985	13.4048	0.251565	0.0568	0.0024	463.819	18.6486	463.825	8.39873	484	52	463.825	8.39873	0.00133445	1.87668	0.289171
Zircon_116	0.623	0.028	0.0782	0.0015	0.42679	12.7877	0.245289	0.0579	0.0023	491.726	17.5174	485.385	8.96859	513	51	485.385	8.96859	1.30629	1.91816	0.548863
Zircon_159_2A	0.75	0.036	0.0921	0.0019	0.429786	10.8578	0.223993	0.0576	0.0026	568.224	20.8879	567.963	11.2156	585	61	567.963	11.2156	0.0459905	2.06298	1.12284
Zircon_140	0.843	0.06	0.0942	0.0022	0.328132	10.6157	0.247925	0.0679	0.0044	620.8	33.0564	580.347	12.9616	909	81	580.347	12.9616	6.97036	2.33546	0.240634
Zircon_156	0.962	0.048	0.0984	0.0021	0.6859	10.1626	0.216885	0.0683	0.0035	684.332	24.8412	605.045	12.3251	912	68	605.045	12.3251	13.1043	2.13415	0.531974
Zircon_139	0.906	0.048	0.1006	0.0036	0.675447	9.94036	0.355719	0.065	0.0029	654.929	25.571	617.944	21.0865	820	54	617.944	21.0865	5.98515	3.57853	0.37277
Zircon_153	1.5	0.1	0.1126	0.0032	0.095016	8.88099	0.252391	0.0923	0.0054	930.386	40.6153	687.852	18.5414	1575	65	687.852	18.5414	35.2596	2.84192	1.09165
Zircon_119	1.13	0.13	0.1255	0.0028	0.77835	7.96813	0.177775	0.0652	0.0057	767.753	61.9717	762.167	16.0378	770	81	762.167	16.0378	0.732938	2.23108	0.558691
Zircon_150	1.35	0.06	0.1455	0.0029	0.022834	6.87285	0.136985	0.0665	0.0027	867.559	25.9247	875.717	16.3206	828	42	828	42	0.931599	1.99313	1.55597
Zircon_137	1.416	0.063	0.15	0.0032	0.479492	6.66667	0.142222	0.0678	0.0028	895.683	26.4773	900.992	17.9384	866	54	866	54	0.589298	2.13333	0.50806
Zircon_126	1.48	0.11	0.1545	0.0069	0.29873	6.47249	0.289063	0.0713	0.0025	922.23	45.0372	926.169	38.529	975	59	975	59	0.425273	4.46602	0.0682807
Zircon_120	1.67	0.1	0.1642	0.0052	0.37462	6.09013	0.192867	0.0735	0.0033	997.186	38.0293	980.107	28.7944	994	58	994	58	1.74258	3.16687	0.341861
Zircon_122	1.514	0.079	0.1467	0.0032	0.087607	6.81663	0.148693	0.0745	0.0036	936.056	31.9074	882.467	17.99	1001	56	1001	56	6.0727	2.18132	0.120504
Zircon_143	1.626	0.072	0.1636	0.0033	0.30495	6.11247	0.123296	0.0728	0.0027	980.314	27.8399	976.783	18.2828	1012	45	1012	45	0.361399	2.01711	0.821643
Zircon_129	1.633	0.096	0.1587	0.0063	0.67219	6.3012	0.250142	0.0741	0.0026	983.017	37.0212	949.579	35.0511	1044	51	1044	51	3.52131	3.96975	0.22901
Zircon_142	2.085	0.09	0.1952	0.004	0.23418	5.12295	0.104979	0.0781	0.003	1143.88	29.6222	1149.52	21.575	1162	55	1162	55	0.490509	2.04918	0.244275
Zircon_144	2.29	0.13	0.2053	0.0088	0.755068	4.87092	0.208788	0.0786	0.0029	1209.21	40.1215	1203.77	47.0673	1171	41	1171	41	0.451832	4.28641	0.26853
Zircon_147	1.84	0.11	0.1647	0.0037	0.26837	6.07165	0.1364	0.0791	0.0045	1059.86	39.3282	982.875	20.4795	1194	57	1194	57	7.83275	2.24651	0.35815
Zircon_117	2.5	0.1	0.2193	0.0044	0.4484	4.55996	0.0914904	0.0827	0.0029	1272.03	29.0109	1278.22	23.2635	1263	52	1263	52	0.483649	2.00638	0.368084
Zircon_134	2.28	0.12	0.1991	0.0045	0.3366	5.0226	0.113519	0.083	0.0039	1206.12	37.1482	1170.52	24.193	1289	77	1289	77	3.04093	2.26017	0.423281
Zircon_131	2.32	0.12	0.2047	0.0069	0.33296	4.8852	0.16467	0.084	0.004	1218.42	36.7006	1200.56	36.9235	1296	54	1296	54	1.48812	3.37079	0.441955
Zircon_148	2.44	0.14	0.2167	0.0053	0.32135	4.61467	0.112865	0.084	0.0041	1254.48	41.3237	1264.46	28.0818	1298	51	1298	51	0.789139	2.44578	0.250964
Zircon_135	2.22	0.14	0.1698	0.0048	0.448258	5.88928	0.166481	0.0945	0.0055	1187.37	44.1471	1011.04	26.4522	1489	56	1489	56	17.4403	2.82686	0.878056
Zircon_123	3.29	0.14	0.2564	0.0052	0.38722	3.90016	0.0790983	0.093	0.0035	1478.69	33.136	1471.44	26.6813	1491	35	1491	35	0.492323	2.02808	0.389665
Zircon_136	4.14	0.17	0.2922	0.0062	0.055106	3.42231	0.0726158	0.1035	0.0038	1662.24	33.5827	1652.57	30.931	1687	42	1687	42	0.585087	2.12183	0.830147
Zircon_125	4.34	0.18	0.3034	0.007	0.73053	3.29598	0.0760443	0.1043	0.0035	1701	34.2264	1708.2	34.622	1699	38	1699	38	0.42184	2.30719	0.335421
Zircon_146	7.01	0.3	0.3908	0.0084	0.5241	2.55885	0.0550009	0.1297	0.0047	2112.7	38.0293	2126.61	38.9356	2108	41	2108	41	0.653993	2.14944	0.431113

## Sheet: Ch3
Analysis	Ratio 207Pb/235U	Error2S	Ratio 206Pb/238U	Error2S	rho	Ratio 238U/206Pb	Error2S	Ratio 207Pb/206Pb	Error2S	207Pb/235Pb Age (Ma)	Error2S	206Pb/238U Age (Ma)	Error2S	207Pb/206Pb Age (Ma)	Error2S	Prefered Age	Unc 2S	% disc. (6/8-7/5)	% Error 6/8 2S	Th/U
Zircon_160_1B	2.057	0.088	0.1925	0.0038	0.63825	5.19481	0.102547	0.0761	0.0026	1134.62	29.2292	1134.94	20.5427	1088	36	1088	36	-0.000279079	1.97403	0.320564
Zircon_161	0.338	0.024	0.04403	0.00094	0.300666	22.7118	0.484876	0.0514	0.0039	295.655	18.2131	277.773	5.80426	562	69	277.773	5.80426	0.0643749	2.13491	0.627236
Zircon_162	1.527	0.062	0.1549	0.003	0.15927	6.45578	0.125031	0.0703	0.0025	941.293	24.9124	928.402	16.7459	950	36	950	36	0.0138853	1.93673	0.357061
Zircon_163	1.74	0.078	0.1688	0.0043	0.34171	5.92417	0.150912	0.0755	0.0027	1023.46	28.9051	1005.53	23.717	1068	39	1068	39	0.0178363	2.54739	0.285893
Zircon_164	0.317	0.016	0.04356	0.00086	0.391156	22.9568	0.453234	0.0525	0.0025	279.592	12.3357	274.871	5.31267	320	41	274.871	5.31267	0.0171773	1.97429	0.642083
Zircon_165	2.27	0.1	0.2056	0.0042	0.34734	4.86381	0.0993581	0.0792	0.0029	1203.02	31.0515	1205.37	22.4584	1193	73	1193	73	-0.0019552	2.0428	0.0183631
Zircon_166	2.39	0.1	0.2168	0.0051	0.25266	4.61255	0.108505	0.078	0.0028	1239.61	29.9523	1264.98	27.0199	1136	42	1136	42	-0.0200595	2.3524	0.267051
Zircon_167	2.17	0.099	0.2004	0.0046	0.77562	4.99002	0.114541	0.0779	0.0028	1171.48	31.7107	1177.51	24.7038	1148	63	1148	63	-0.00511858	2.29541	0.201271
Zircon_168	2.02	0.085	0.1915	0.0037	0.49305	5.22193	0.100894	0.0747	0.0026	1122.26	28.5787	1129.53	20.0189	1058	37	1058	37	-0.00643898	1.93211	0.3335
Zircon_169	2.21	0.12	0.1986	0.0045	0.098774	5.03525	0.114092	0.0811	0.004	1184.21	37.9582	1167.83	24.2031	1244	57	1244	57	0.0140252	2.26586	0.238098
Zircon_170	0.357	0.024	0.03943	0.00098	0.42427	25.3614	0.630337	0.0659	0.0043	309.972	17.9581	249.307	6.07803	831	71	249.307	6.07803	0.243337	2.48542	0.619402
Zircon_171	0.318	0.018	0.04303	0.0009	0.36951	23.2396	0.486071	0.0553	0.0028	280.363	13.8671	271.596	5.5626	376	70	271.596	5.5626	0.0322801	2.09156	0.496406
Zircon_172	0.4	0.52	0.043	0.023	0.38157	23.2558	12.4392	0.0682	0.008	341.648	377.142	271.41	142.159	870	150	271.41	142.159	0.258788	53.4884	0.607003
Zircon_173	0.349	0.02	0.0451	0.001	0.386918	22.1729	0.49164	0.0574	0.0031	303.969	15.0539	284.377	6.16843	429	64	284.377	6.16843	0.0688931	2.21729	0.49299
Zircon_174	1.91	0.11	0.1829	0.0058	0.46392	5.46747	0.173381	0.0768	0.0026	1084.58	38.3822	1082.83	31.6091	1110	44	1110	44	0.00161758	3.17113	0.313362
Zircon_175	0.321	0.017	0.04392	0.00095	0.40843	22.7687	0.492492	0.0529	0.0025	282.671	13.067	277.094	5.86663	378	49	277.094	5.86663	0.0201277	2.16302	0.682416
Zircon_176	2.032	0.089	0.1914	0.0042	0.39995	5.22466	0.114648	0.0752	0.0026	1126.29	29.8051	1128.99	22.726	1068	42	1068	42	-0.00239623	2.19436	0.321883
Zircon_177	0.333	0.039	0.04482	0.00098	0.096983	22.3115	0.487846	0.0527	0.0059	291.854	29.7074	282.65	6.04668	330	110	282.65	6.04668	0.032563	2.18652	0.828609
Zircon_178	0.766	0.036	0.0944	0.0019	0.54506	10.5932	0.213211	0.058	0.0022	577.466	20.6986	581.526	11.1921	531	53	581.526	11.1921	-0.00698164	2.01271	0.663823
Zircon_179	0.834	0.038	0.1005	0.0021	0.20233	9.95025	0.207916	0.0594	0.0023	615.829	21.0385	617.358	12.3016	568	56	617.358	12.3016	-0.00247689	2.08955	0.379589
Zircon_180	0.333	0.029	0.0426	0.0011	0.29696	23.4742	0.606141	0.0549	0.0047	291.854	22.0901	268.938	6.80154	587	73	268.938	6.80154	0.0852096	2.58216	0.515721
Zircon_181	0.34	0.022	0.0441	0.001	0.350443	22.6757	0.514189	0.0552	0.0035	297.172	16.6705	278.206	6.17433	445	65	278.206	6.17433	0.0681728	2.26757	0.491255
Zircon_182	0.325	0.019	0.04409	0.00094	0.364685	22.6809	0.483557	0.0558	0.0027	285.741	14.5602	278.144	5.80393	476	61	278.144	5.80393	0.0273149	2.132	0.637182
Zircon_183	1.611	0.067	0.1639	0.0034	0.5269	6.10128	0.126567	0.0698	0.0023	974.497	26.0554	978.445	18.832	932	41	932	41	-0.00403536	2.07444	0.434135
Zircon_184	0.367	0.035	0.0441	0.0013	0.5321	22.6757	0.668446	0.058	0.0045	317.428	25.9974	278.206	8.02663	590	130	278.206	8.02663	0.140982	2.94785	0.656342
Zircon_185	2.137	0.087	0.1957	0.0041	0.42708	5.10986	0.107054	0.078	0.0026	1160.85	28.1601	1152.22	22.1052	1148	28	1148	28	0.0074965	2.09504	0.551358
Zircon_186	0.36	0.022	0.04506	0.00096	0.13812	22.1926	0.472812	0.0571	0.0035	312.215	16.4253	284.13	5.92192	485	83	284.13	5.92192	0.0988434	2.13049	0.532487
Zircon_187	0.324	0.059	0.0437	0.0011	0.138231	22.8833	0.57601	0.0554	0.0045	284.975	45.2474	275.736	6.79437	460	130	275.736	6.79437	0.0335079	2.51716	0.869024
Zircon_188	2.22	0.11	0.1862	0.0047	0.42917	5.37057	0.135562	0.086	0.0037	1187.37	34.687	1100.79	25.543	1344	47	1344	47	0.0786502	2.52417	0.298472
Zircon_189	1.703	0.076	0.1674	0.0034	0.455119	5.97372	0.12133	0.0747	0.003	1009.66	28.5494	997.802	18.7755	1064	39	1064	39	0.0118827	2.03106	0.17269
Zircon_190	0.352	0.023	0.043	0.00094	0.33456	23.2558	0.508383	0.0588	0.0038	306.224	17.2735	271.41	5.80999	576	67	271.41	5.80999	0.12827	2.18605	0.58243
Zircon_191	3.32	0.14	0.264	0.0056	0.28698	3.78788	0.0803489	0.0897	0.0031	1485.76	32.9059	1510.32	28.561	1424	36	1424	36	-0.0162602	2.12121	0.670196
Zircon_192	0.322	0.038	0.0418	0.0012	0.243264	23.9234	0.686797	0.0547	0.0064	283.44	29.1865	263.989	7.42556	510	120	263.989	7.42556	0.0736802	2.87081	0.51025
Zircon_193	1.84	0.077	0.1767	0.0035	0.473324	5.65931	0.112097	0.0743	0.0026	1059.86	27.5298	1048.96	19.175	1056	45	1056	45	0.0103969	1.98076	0.0748763
Zircon_194	2.278	0.093	0.2053	0.0042	0.16765	4.87092	0.0996486	0.0793	0.0028	1205.5	28.8074	1203.77	22.464	1181	42	1181	42	0.00143609	2.04579	0.344634
Zircon_195	1.592	0.064	0.1623	0.0031	0.475123	6.16143	0.117686	0.0701	0.0024	967.081	25.0712	969.577	17.194	935	40	935	40	-0.00257437	1.91004	0.0977681
Zircon_196	4.81	0.2	0.3241	0.0062	0.19176	3.08547	0.0590247	0.1065	0.0038	1786.65	34.9529	1809.78	30.1858	1745	30	1745	30	-0.0127812	1.91299	0.41452
Zircon_197	2.005	0.083	0.1889	0.0037	0.51284	5.29381	0.10369	0.0763	0.0026	1117.2	28.0455	1115.45	20.0627	1107	37	1107	37	0.00157228	1.95871	0.448595
Zircon_198	0.372	0.02	0.04302	0.00094	0.092251	23.245	0.50791	0.0626	0.0032	321.135	14.8015	271.534	5.80988	688	78	271.534	5.80988	0.182669	2.18503	0.64349
Zircon_199	0.375	0.032	0.044	0.0013	0.346236	22.7273	0.671488	0.0615	0.0047	323.353	23.6307	277.588	8.0274	718	87	277.588	8.0274	0.164864	2.95455	0.386862
Zircon_200	3.87	0.23	0.2832	0.0096	0.48941	3.53107	0.119697	0.0974	0.0034	1607.45	47.9544	1607.51	48.2291	1573	66	1573	66	-3.9371e-05	3.38983	0.599889
Zircon_201	2.19	0.29	0.1967	0.0071	0.34057	5.08388	0.183506	0.0765	0.0075	1177.87	92.3076	1157.61	38.2477	1196	93	1196	93	0.0175017	3.60956	0.20227
Zircon_202	2.46	0.11	0.2147	0.0051	0.46725	4.65766	0.110638	0.0818	0.0027	1260.36	32.281	1253.85	27.0666	1243	34	1243	34	0.00519488	2.37541	0.296489
Zircon_203	0.326	0.02	0.04445	0.00097	0.355703	22.4972	0.49094	0.0524	0.0034	286.507	15.315	280.366	5.9871	390	89	280.366	5.9871	0.0219039	2.18223	0.460789
Zircon_204	1.649	0.071	0.1675	0.0033	0.023533	5.97015	0.117621	0.0713	0.0026	989.168	27.2149	998.354	18.2217	979	42	979	42	-0.00920128	1.97015	0.287786
Zircon_205	1.623	0.069	0.1641	0.0032	0.53163	6.09385	0.118832	0.071	0.0026	979.153	26.7104	979.553	17.7211	945	39	945	39	-0.000408452	1.95003	0.224648
Zircon_206	0.331	0.022	0.044	0.001	0.21405	22.7273	0.516529	0.0547	0.0033	290.329	16.7832	277.588	6.17493	296	67	277.588	6.17493	0.0458981	2.27273	0.487882
Zircon_207	0.424	0.054	0.042	0.0015	0.078704	23.8095	0.85034	0.071	0.0095	358.907	38.5047	265.227	9.28017	1040	170	265.227	9.28017	0.35321	3.57143	0.333093
Zircon_208	2.72	0.11	0.2296	0.0052	0.81123	4.3554	0.0986415	0.0857	0.0029	1333.93	30.0248	1332.45	27.2629	1330	43	1330	43	0.00111634	2.26481	0.36787
Zircon_209	1.918	0.084	0.1828	0.0043	0.78965	5.47046	0.128681	0.0775	0.0026	1087.37	29.2297	1082.29	23.4363	1139	54	1139	54	0.00469762	2.3523	0.0782922
Zircon_210	1.623	0.07	0.1633	0.0032	0.078704	6.1237	0.119999	0.0722	0.0026	979.153	27.0975	975.121	17.7333	987	47	987	47	0.00413457	1.95958	0.555109
Zircon_211	0.344	0.021	0.0444	0.0011	0.405834	22.5225	0.55799	0.0571	0.0038	300.198	15.8654	280.058	6.78982	457	84	280.058	6.78982	0.0719155	2.47748	0.418268
Zircon_212	1.613	0.077	0.1625	0.0034	0.45288	6.15385	0.128757	0.072	0.0027	975.274	29.9214	970.686	18.8546	1004	49	1004	49	0.00472665	2.09231	0.535331
Zircon_213	0.328	0.02	0.0446	0.0012	0.49217	22.4215	0.60327	0.0554	0.0026	288.038	15.2919	281.292	7.40565	416	62	281.292	7.40565	0.0239811	2.69058	0.459865
Zircon_214	2.81	0.17	0.235	0.0083	0.62408	4.25532	0.150294	0.0857	0.0033	1358.21	45.3058	1360.69	43.3255	1316	74	1316	74	-0.00182902	3.53191	0.125447
Zircon_215	1.616	0.07	0.1621	0.0032	0.41049	6.16903	0.121782	0.0717	0.0026	976.439	27.17	968.468	17.7516	986	40	986	40	0.00823132	1.97409	0.0450024
Zircon_216	0.338	0.021	0.0453	0.001	0.355303	22.0751	0.487308	0.0538	0.003	295.655	15.9365	285.611	6.16725	435	47	285.611	6.16725	0.0351684	2.20751	0.36564
Zircon_217	2.36	0.12	0.2041	0.0045	0.433611	4.89956	0.108026	0.0824	0.0033	1230.58	36.2637	1197.35	24.0925	1256	41	1256	41	0.0277595	2.2048	0.282091
Zircon_218	0.323	0.02	0.0454	0.001	0.11723	22.0264	0.485164	0.0515	0.003	284.208	15.3497	286.227	6.16666	345	82	286.227	6.16666	-0.00705636	2.20264	0.502588
Zircon_219_1B	0.356	0.022	0.0417	0.001	0.388053	23.9808	0.57508	0.0622	0.0039	309.224	16.4738	263.37	6.18856	704	64	263.37	6.18856	0.174103	2.39808	0.419451

## Sheet: Ch4
Analysis	Ratio 207Pb/235U	Error2S	Ratio 206Pb/238U	Error2S	rho	Ratio 238U/206Pb	Error2S	Ratio 207Pb/206Pb	Error2S	207Pb/235Pb Age (Ma)	Error2S	206Pb/238U Age (Ma)	Error2S	207Pb/206Pb Age (Ma)	Error2S	Prefered Age	Unc 2S	% disc. (6/8-7/5)	% Error 6/8 2S	Th/U
Zircon_001_5B	2.132	0.099	0.1951	0.0039	0.33609	5.12558	0.102459	0.0802	0.0031	1159.23	32.0954	1148.98	21.0374	1231	47	1231	47	0.89241	1.99897	0.3157
Zircon_002	1.475	0.061	0.1533	0.0031	0.63631	6.52316	0.13191	0.0696	0.0023	920.181	25.0256	919.465	17.3281	916	41	916	41	0.0778954	2.02218	0.171144
Zircon_003	2.37	0.11	0.2036	0.0049	0.16562	4.91159	0.118206	0.0829	0.0032	1233.6	33.1431	1194.67	26.245	1262	70	1262	70	3.25887	2.40668	0.284923
Zircon_004	2.27	0.1	0.2042	0.0043	0.33603	4.89716	0.103123	0.0805	0.003	1203.02	31.0515	1197.88	23.0198	1216	41	1216	41	0.428568	2.10578	0.311032
Zircon_005	2.259	0.096	0.2044	0.0041	0.42396	4.89237	0.0981346	0.08	0.0028	1199.59	29.91	1198.95	21.9455	1208	45	1208	45	0.053523	2.00587	0.393617
Zircon_006	2.18	0.1	0.1986	0.0046	0.28093	5.03525	0.116627	0.0794	0.0031	1174.68	31.9303	1167.83	24.7409	1170	43	1170	43	0.586116	2.31621	0.258554
Zircon_007	2.4	0.12	0.2088	0.005	0.478927	4.78927	0.114686	0.0836	0.0039	1242.6	35.837	1222.46	26.6654	1313	49	1313	49	1.64749	2.39464	0.304089
Zircon_008	1.078	0.088	0.1114	0.006	0.77811	8.97666	0.483483	0.0726	0.0025	742.657	42.9999	680.895	34.8027	999	48	680.895	34.8027	9.07068	5.386	0.244704
Zircon_009	3.39	0.14	0.2634	0.0053	0.21953	3.79651	0.0763914	0.0937	0.0034	1502.09	32.3812	1507.26	27.0438	1493	41	1493	41	0.343423	2.01215	0.607884
Zircon_010	2.198	0.098	0.2003	0.0047	0.5025	4.99251	0.117148	0.0783	0.0028	1180.41	31.1156	1176.97	25.243	1152	46	1152	46	0.292208	2.34648	0.361997
Zircon_011	2.12	0.1	0.1939	0.004	0.0078007	5.1573	0.106391	0.0809	0.0034	1155.34	32.5443	1142.5	21.5985	1217	50	1217	50	1.12316	2.06292	0.387329
Zircon_012	2.14	0.1	0.1952	0.0047	0.2133	5.12295	0.12335	0.0785	0.0031	1161.82	32.337	1149.52	25.3507	1168	45	1168	45	1.0704	2.40779	0.306047
Zircon_013	2.43	0.11	0.2154	0.0047	0.482021	4.64253	0.101299	0.0801	0.0031	1251.52	32.5633	1257.56	24.9293	1203	39	1203	39	0.480504	2.18199	0.489557
Zircon_014	1.887	0.081	0.1808	0.0041	0.78166	5.53097	0.125426	0.0736	0.0026	1076.53	28.4884	1071.38	22.3841	1031	50	1031	50	0.480611	2.2677	0.473689
Zircon_015	1.72	0.083	0.171	0.0048	0.72434	5.84795	0.164153	0.0725	0.0027	1016.02	30.9841	1017.65	26.4251	996	41	996	41	0.159853	2.80702	0.0888261
Zircon_016	2.126	0.089	0.1968	0.0041	0.72688	5.0813	0.10586	0.0784	0.0027	1157.29	28.9089	1158.14	22.0849	1153	41	1153	41	0.0740035	2.08333	0.223131
Zircon_017	1.561	0.066	0.1596	0.0032	0.33345	6.26566	0.125627	0.0709	0.0026	954.864	26.1676	954.584	17.7899	967	44	967	44	0.0292994	2.00501	0.228273
Zircon_018	2.001	0.089	0.1895	0.0043	0.38044	5.27704	0.119743	0.0764	0.0027	1115.85	30.113	1118.7	23.3043	1104	46	1104	46	0.254873	2.26913	0.183971
Zircon_019	2.018	0.091	0.1913	0.0042	0.57101	5.22739	0.114768	0.0763	0.0028	1121.59	30.6163	1128.45	22.728	1099	48	1099	48	0.608224	2.1955	0.202929
Zircon_020	2.171	0.098	0.2004	0.0042	0.49981	4.99002	0.104581	0.0771	0.0027	1171.8	31.3805	1177.51	22.5557	1129	48	1129	48	0.48466	2.09581	0.209935
Zircon_021	4.05	0.19	0.289	0.0066	0.81672	3.46021	0.079022	0.1006	0.0037	1644.3	38.2025	1636.58	33.0083	1635	43	1635	43	0.471506	2.28374	0.281187
Zircon_022	2.38	0.15	0.2118	0.0059	0.71695	4.72144	0.131523	0.086	0.0032	1236.61	45.0614	1238.44	31.3873	1331	60	1331	60	0.147761	2.78565	0.428712
Zircon_023	1.642	0.073	0.1657	0.0039	0.56449	6.035	0.142043	0.0709	0.0026	986.481	28.0556	988.407	21.568	957	49	957	49	0.194865	2.35365	0.0932877
Zircon_024	2.183	0.089	0.201	0.0039	0.51673	4.97512	0.0965323	0.0792	0.0028	1175.64	28.3912	1180.73	20.9341	1173	38	1173	38	0.431351	1.9403	0.257124
Zircon_025	2.263	0.093	0.206	0.0041	0.37721	4.85437	0.0966161	0.0779	0.0027	1200.84	28.9398	1207.51	21.9164	1151	35	1151	35	0.552476	1.99029	0.193182
Zircon_026	2.044	0.094	0.1932	0.004	0.2529	5.17598	0.107163	0.0775	0.003	1130.3	31.3555	1138.72	21.6112	1140	47	1140	47	0.740036	2.07039	0.487752
Zircon_027	1.605	0.066	0.1617	0.0031	0.27696	6.18429	0.118561	0.0715	0.0025	972.161	25.7256	966.248	17.2028	971	30	971	30	0.611906	1.91713	0.26311
Zircon_028	2.5	0.11	0.2132	0.0054	0.23476	4.69043	0.118801	0.0844	0.0028	1272.03	31.912	1245.88	28.6942	1302	46	1302	46	2.09895	2.53283	0.239172
Zircon_029	2.135	0.086	0.1983	0.0039	0.14869	5.04286	0.0991789	0.0776	0.0027	1160.21	27.8542	1166.22	20.9812	1142	34	1142	34	0.515569	1.96672	0.136422
Zircon_030	2.32	0.11	0.2082	0.0052	0.5643	4.80307	0.119962	0.0801	0.0028	1218.42	33.6422	1219.26	27.7458	1198	46	1198	46	0.0685938	2.4976	0.206997
Zircon_031	1.46	0.13	0.1521	0.0081	0.78182	6.57462	0.350128	0.0698	0.0026	914.009	53.6585	912.754	45.3239	933	63	933	63	0.137476	5.32544	0.120549
Zircon_032	1.9	0.11	0.1829	0.007	0.69214	5.46747	0.209252	0.0751	0.0026	1081.09	38.5145	1082.83	38.1489	1060	41	1060	41	0.161034	3.82723	0.600931
Zircon_033	2.18	0.1	0.1955	0.0045	0.35037	5.11509	0.117739	0.0839	0.0033	1174.68	31.9303	1151.14	24.2658	1290	50	1290	50	2.04491	2.30179	0.339957
Zircon_034	1.925	0.081	0.1696	0.0051	0.16362	5.89623	0.177304	0.0821	0.0028	1089.81	28.1183	1009.94	28.1103	1244	55	1244	55	7.90796	3.00708	0.239274
Zircon_035	2.11	0.1	0.1951	0.0047	0.52173	5.12558	0.123476	0.0797	0.0029	1152.08	32.649	1148.98	25.3528	1183	44	1183	44	0.269468	2.40902	0.372407
Zircon_036	2.101	0.087	0.1957	0.0039	0.2105	5.10986	0.101832	0.0775	0.0027	1149.13	28.487	1152.22	21.0269	1137	44	1137	44	0.267506	1.99285	0.236145
Zircon_037	1.618	0.093	0.1609	0.0041	0.26233	6.21504	0.15837	0.075	0.0031	977.215	36.0698	961.807	22.7678	1044	53	1044	53	1.60199	2.54817	0.18958
Zircon_038	1.74	0.11	0.1676	0.0038	0.36325	5.96659	0.135281	0.0736	0.0041	1023.46	40.7636	998.906	20.9808	1048	66	1048	66	2.45839	2.2673	0.484998
Zircon_039	2.109	0.092	0.1969	0.0039	0.2821	5.07872	0.100594	0.0773	0.0029	1151.75	30.0467	1158.68	21.0058	1142	47	1142	47	0.598325	1.9807	0.454053
Zircon_040	1.555	0.066	0.1593	0.0032	0.51632	6.27746	0.126101	0.0713	0.0025	952.482	26.2291	952.916	17.7945	962	41	962	41	0.04554	2.00879	0.757274
Zircon_041	1.949	0.082	0.1853	0.0039	0.62476	5.39665	0.113583	0.0755	0.0027	1098.1	28.2338	1095.9	21.2114	1092	42	1092	42	0.201025	2.1047	0.260541
Zircon_042	1.91	0.13	0.1656	0.004	0.23708	6.03865	0.145861	0.0843	0.0057	1084.58	45.3608	987.854	22.1229	1250	96	1250	96	9.79194	2.41546	0.509298
Zircon_043	2.09	0.1	0.1957	0.004	0.31813	5.10986	0.104443	0.0773	0.0031	1145.53	32.8603	1152.22	21.566	1143	47	1143	47	0.58066	2.04394	0.274933
Zircon_044	1.644	0.096	0.1486	0.0057	0.52896	6.72948	0.258129	0.0793	0.0032	987.25	36.8672	893.14	31.9918	1177	52	1177	52	10.537	3.8358	0.433111
Zircon_045	2.08	0.087	0.1956	0.004	0.40553	5.11247	0.10455	0.0773	0.0027	1142.23	28.6813	1151.68	21.5678	1126	41	1126	41	0.819904	2.04499	0.210255
Zircon_046	1.485	0.063	0.1558	0.003	0.41761	6.41849	0.123591	0.0692	0.0026	924.275	25.7421	933.424	16.7329	894	47	894	47	0.980118	1.92555	0.277673
Zircon_047	1.798	0.09	0.1563	0.0054	0.77429	6.39795	0.221043	0.082	0.003	1044.73	32.6606	936.212	30.1062	1256	44	1256	44	11.5914	3.45489	0.320048
Zircon_048	2.26	0.097	0.2051	0.004	0.17839	4.87567	0.0950886	0.0806	0.003	1199.91	30.2123	1202.7	21.3978	1209	44	1209	44	0.232184	1.95027	0.395574
Zircon_049	2.202	0.089	0.201	0.0042	0.47943	4.97512	0.103958	0.0776	0.0025	1181.68	28.2227	1180.73	22.5444	1150	53	1150	53	0.0804534	2.08955	0.152817
Zircon_050	1.925	0.083	0.185	0.0038	0.5168	5.40541	0.11103	0.0762	0.0027	1089.81	28.8126	1094.27	20.6727	1093	46	1093	46	0.407805	2.05405	0.344427
Zircon_051	1.878	0.083	0.1793	0.004	0.12225	5.57724	0.124423	0.0751	0.0027	1073.36	29.2831	1063.18	21.8659	1076	40	1076	40	0.956876	2.2309	0.264638
Zircon_052	2.059	0.084	0.197	0.0042	0.54099	5.07614	0.108222	0.0751	0.0025	1135.29	27.8824	1159.22	22.6197	1065	31	1065	31	2.06464	2.13198	0.0587824
Zircon_053	1.717	0.083	0.17	0.0043	0.92191	5.88235	0.148789	0.0737	0.0025	1014.9	31.0183	1012.14	23.6927	1043	38	1043	38	0.272719	2.52941	0.132275
Zircon_054	1.63	0.07	0.1621	0.0033	0.14574	6.16903	0.125588	0.0729	0.0028	981.859	27.0254	968.468	18.3064	1029	36	1029	36	1.38273	2.03578	0.123032
Zircon_055	2.128	0.092	0.1937	0.004	0.33949	5.16262	0.106611	0.0791	0.0029	1157.94	29.8642	1141.42	21.6022	1190	39	1190	39	1.44664	2.06505	0.476904
Zircon_056	1.976	0.085	0.1884	0.0044	0.77923	5.30786	0.123963	0.0752	0.0026	1107.36	29.0012	1112.74	23.8683	1085	43	1085	43	0.48359	2.33546	0.124721
Zircon_057	1.466	0.063	0.1424	0.0028	0.457553	7.02247	0.138082	0.0733	0.0027	916.482	25.9404	858.247	15.8005	1026	43	1026	43	6.78532	1.96629	0.259598
Zircon_058	2.32	0.1	0.2093	0.0043	0.35651	4.77783	0.098159	0.0795	0.0031	1218.42	30.5838	1225.13	22.9227	1186	48	1186	48	0.547124	2.05447	0.290608
Zircon_059	2.031	0.096	0.1922	0.0044	0.76562	5.20291	0.119109	0.0754	0.0028	1125.95	32.1599	1133.32	23.7923	1081	54	1081	54	0.650089	2.28928	0.255311
Zircon_060	0.308	0.015	0.04261	0.00087	0.025633	23.4687	0.479177	0.0522	0.0022	272.63	11.6443	268.999	5.37935	316	50	268.999	5.37935	1.34952	2.04177	0.515813
Zircon_061	2.33	0.095	0.215	0.0042	0.16954	4.65116	0.0908599	0.0792	0.0028	1221.48	28.9674	1255.44	22.2846	1165	38	1165	38	2.70532	1.95349	0.283581
Zircon_062	2.2	0.1	0.1989	0.0047	0.30328	5.02765	0.118803	0.0805	0.0033	1181.04	31.7307	1169.45	25.2724	1183	51	1183	51	0.991716	2.363	0.451895
Zircon_063	1.8	0.1	0.1646	0.0052	0.57781	6.07533	0.19193	0.0789	0.0031	1045.46	36.2637	982.321	28.7845	1240	47	1240	47	6.42731	3.15917	0.252722
Zircon_064	2.52	0.11	0.2171	0.0043	0.29603	4.60617	0.0912323	0.0861	0.0031	1277.82	31.7307	1266.57	22.7758	1348	40	1348	40	0.887893	1.98065	0.275382
Zircon_065	1.925	0.08	0.1818	0.0036	0.14543	5.50055	0.108922	0.0781	0.0028	1089.81	27.7712	1076.84	19.6377	1149	45	1149	45	1.20442	1.9802	0.39356
Zircon_066	1.378	0.065	0.1369	0.0033	0.13321	7.3046	0.176079	0.0724	0.0028	879.586	27.7544	827.136	18.7122	987	44	987	44	6.34116	2.41052	0.374331
Zircon_067	1.71	0.1	0.1512	0.0074	0.46765	6.61376	0.323689	0.081	0.0031	1012.28	37.468	907.716	41.4394	1201	46	1201	46	11.52	4.89418	0.402544
Zircon_068	1.563	0.067	0.1601	0.0035	0.38758	6.2461	0.136548	0.0704	0.0024	955.657	26.5434	957.363	19.4493	936	41	936	41	0.178275	2.18613	0.15134
Zircon_069	2.283	0.096	0.2066	0.004	0.61578	4.84027	0.0937129	0.0798	0.0026	1207.04	29.6914	1210.72	21.3712	1190	42	1190	42	0.303379	1.93611	0.587406
Zircon_070	2.4	0.11	0.2067	0.0043	0.28056	4.83793	0.100644	0.0845	0.0036	1242.6	32.8506	1211.25	22.9721	1307	58	1307	58	2.58816	2.08031	0.1601
Zircon_071	1.944	0.078	0.1847	0.0038	0.28663	5.41419	0.111391	0.0764	0.0026	1096.38	26.9021	1092.64	20.6779	1110	42	1110	42	0.342668	2.05739	0.186649
Zircon_072	1.584	0.086	0.1611	0.0043	0.719	6.20732	0.165683	0.0721	0.0026	963.942	33.7937	962.918	23.8743	992	50	992	50	0.106382	2.66915	0.297176
Zircon_073	1.784	0.081	0.1778	0.0041	0.41506	5.6243	0.129694	0.071	0.0027	1039.64	29.5424	1054.98	22.4411	974	40	974	40	1.454	2.30596	0.261492
Zircon_074	1.661	0.068	0.1633	0.0037	0.29207	6.1237	0.138749	0.0746	0.0025	993.757	25.9474	975.121	20.5042	1062	38	1062	38	1.91117	2.26577	0.157637
Zircon_075m	1.96	0.11	0.1923	0.0075	0.80183	5.20021	0.202816	0.0777	0.0025	1101.88	37.7338	1133.86	40.5516	1142	44	1142	44	2.82013	3.90016	0.510633
Zircon_076	1.783	0.093	0.1762	0.0052	0.58588	5.67537	0.167491	0.0729	0.0027	1039.27	33.9312	1046.22	28.5006	1003	50	1003	50	0.663412	2.95119	0.326445
Zircon_077	1.541	0.072	0.1562	0.0031	0.27576	6.40205	0.127057	0.0727	0.0029	946.903	28.7712	935.655	17.2847	1023	44	1023	44	1.20221	1.98464	0.296291
Zircon_078	1.734	0.073	0.1707	0.0034	0.53247	5.85823	0.116684	0.0733	0.0026	1021.24	27.1115	1016	18.7226	1018	44	1018	44	0.515539	1.9918	0.215657
Zircon_079	1.731	0.079	0.1689	0.0037	0.480001	5.92066	0.129701	0.0758	0.0032	1020.12	29.3721	1006.08	20.4059	1089	44	1089	44	1.39578	2.19065	0.397439
Zircon_080	1.603	0.073	0.1601	0.0034	0.466335	6.2461	0.132647	0.0714	0.0028	971.381	28.476	957.363	18.8936	989	43	989	43	1.46419	2.12367	0.295046
Zircon_081	2.064	0.092	0.1923	0.0049	0.65573	5.20021	0.132507	0.0785	0.0028	1136.95	30.488	1133.86	26.4937	1161	40	1161	40	0.272251	2.5481	0.392233
Zircon_082	2.3	0.11	0.2067	0.0049	0.44928	4.83793	0.114687	0.0807	0.003	1212.29	33.8461	1211.25	26.1775	1202	30	1202	30	0.0856105	2.37059	0.320112
Zircon_083	2.12	0.1	0.1986	0.0057	0.54226	5.03525	0.144516	0.0762	0.0026	1155.34	32.5443	1167.83	30.6572	1088	40	1088	40	1.07005	2.87009	0.112334
Zircon_084	1.56	0.086	0.1577	0.0059	0.14615	6.34115	0.23724	0.0727	0.0026	954.467	34.1105	944.013	32.854	1023	59	1023	59	1.10746	3.74128	0.287665
Zircon_085	1.555	0.086	0.159	0.0038	0.63128	6.28931	0.150311	0.0721	0.0027	952.482	34.1773	951.248	21.1365	987	52	987	52	0.129776	2.38994	0.324622
Zircon_086	2.21	0.1	0.2038	0.0043	0.31417	4.90677	0.103529	0.0787	0.0033	1184.21	31.6319	1195.74	23.0275	1183	51	1183	51	0.964127	2.10991	0.284025
Zircon_087	2.024	0.092	0.1891	0.0041	0.24797	5.28821	0.114657	0.0778	0.003	1123.6	30.8913	1116.53	22.2279	1147	49	1147	49	0.633145	2.16816	0.558004
Zircon_088	1.921	0.085	0.1823	0.0036	0.30401	5.48546	0.108325	0.0758	0.0028	1088.42	29.5473	1079.56	19.6294	1110	52	1110	52	0.820081	1.97477	0.500829
Zircon_089	2.036	0.084	0.1904	0.0037	0.48736	5.2521	0.102063	0.0774	0.0027	1127.62	28.0936	1123.58	20.0374	1133	42	1133	42	0.360152	1.94328	0.2003
Zircon_090	2.297	0.096	0.2077	0.004	0.25955	4.81464	0.0927229	0.0805	0.0028	1211.37	29.5653	1216.59	21.3517	1211	32	1211	32	0.429617	1.92585	0.363541
Zircon_091	1.87	0.12	0.1822	0.0037	0.70704	5.48847	0.111456	0.0765	0.0042	1070.53	42.455	1079.02	20.1764	1124	61	1124	61	0.786492	2.03074	0.247677
Zircon_092	1.736	0.075	0.173	0.0034	0.075202	5.78035	0.113602	0.0723	0.0027	1021.98	27.834	1028.65	18.6859	990	41	990	41	0.648661	1.96532	0.448927
Zircon_093	2.081	0.084	0.1936	0.0037	0.45689	5.16529	0.0987168	0.0771	0.0026	1142.56	27.6833	1140.88	19.9837	1122	48	1122	48	0.147246	1.91116	0.149129
Zircon_094	2.192	0.094	0.199	0.0042	0.492163	5.02513	0.106058	0.0814	0.0032	1178.5	29.9016	1169.98	22.582	1248	35	1248	35	0.728066	2.11055	0.493403
Zircon_095	1.602	0.069	0.1626	0.0031	0.16432	6.15006	0.117252	0.071	0.0026	970.991	26.926	971.241	17.1895	970	54	970	54	0.025733	1.90652	0.259177
Zircon_096	1.609	0.073	0.1628	0.0034	0.73802	6.14251	0.128283	0.0723	0.0025	973.719	28.4105	972.35	18.8498	1000	44	1000	44	0.140805	2.08845	0.187132
Zircon_097	2.37	0.1	0.2094	0.0045	0.51694	4.77555	0.102626	0.0832	0.0028	1233.6	30.1301	1225.66	23.9869	1281	36	1281	36	0.647968	2.149	0.10958
Zircon_098	1.802	0.085	0.1745	0.0036	0.44132	5.73066	0.118226	0.0756	0.0027	1046.18	30.8021	1036.89	19.7598	1081	52	1081	52	0.896157	2.06304	0.270437
Zircon_099	1.91	0.1	0.1779	0.004	0.46426	5.62114	0.126389	0.0771	0.0033	1084.58	34.8929	1055.53	21.8919	1089	53	1089	53	2.75299	2.24845	0.319877
Zircon_100	2.09	0.087	0.1956	0.0039	0.23536	5.11247	0.101936	0.0758	0.0028	1145.53	28.5885	1151.68	21.0286	1097	47	1097	47	0.534116	1.99387	0.296557
Zircon_101	1.77	0.1	0.1724	0.0041	0.43682	5.80046	0.137946	0.0764	0.0033	1034.52	36.6564	1025.35	22.5445	1088	46	1088	46	0.893954	2.37819	0.214046
Zircon_102	2.2	0.1	0.2008	0.0044	0.73624	4.98008	0.109125	0.0793	0.0029	1181.04	31.7307	1179.65	23.6219	1190	59	1190	59	0.117759	2.19124	0.237347
Zircon_103	1.438	0.064	0.1437	0.003	0.037401	6.95894	0.145281	0.0736	0.0028	904.887	26.6548	865.579	16.9099	1047	50	1047	50	4.54124	2.08768	0.401469
Zircon_104	1.94	0.087	0.186	0.0037	0.9091	5.37634	0.106949	0.0753	0.0029	1095	30.047	1099.71	20.1117	1096	89	1096	89	0.427986	1.98925	0.15675
Zircon_105	1.672	0.092	0.1677	0.0045	0.64923	5.96303	0.16001	0.0734	0.0027	997.946	34.9608	999.458	24.8435	1024	40	1024	40	0.151318	2.68336	0.242668
Zircon_106	2.169	0.092	0.2009	0.0042	0.49635	4.9776	0.104061	0.0784	0.0029	1171.16	29.4778	1180.19	22.5463	1158	46	1158	46	0.765314	2.09059	0.233409
Zircon_107	2.43	0.11	0.2165	0.0053	0.14813	4.61894	0.113073	0.0786	0.0028	1251.52	32.5633	1263.4	28.0864	1188	41	1188	41	0.93989	2.44804	0.224543
Zircon_108	1.82	0.13	0.179	0.0079	0.84614	5.58659	0.246559	0.0731	0.0028	1052.69	46.8084	1061.54	43.1962	1019	57	1019	57	0.834483	4.41341	0.0351272
Zircon_109_5B	1.604	0.074	0.1641	0.0033	0.21984	6.09385	0.122545	0.0716	0.0029	971.771	28.855	979.553	18.2749	971	61	971	61	0.794435	2.01097	0.479146

## Sheet: Ch5
Analysis	Ratio 207Pb/235U	Error2S	Ratio 206Pb/238U	Error2S	rho	Ratio 238U/206Pb	Error2S	Ratio 207Pb/206Pb	Error2S	207Pb/235Pb Age (Ma)	Error2S	206Pb/238U Age (Ma)	Error2S	207Pb/206Pb Age (Ma)	Error2S	Prefered Age	Unc 2S	% disc. (6/8-7/5)	% Error 6/8 2S	Th/U
260216_2B__1.FIN2	1.683	0.019	0.1695	0.0015	0.49538	5.89971	0.0522098	0.07274	0.00075	1001.4	7.1	1009.2	8.5	1003	21	1003	21	-0.00772889	0.0209372	127.7
260216_2B__10.FIN2	1.827	0.034	0.1733	0.0024	0.48647	5.77034	0.0799124	0.0767	0.0013	1054	12	1030	13	1108	34	1108	34	0.023301	0.0306859	105.4
260216_2B__10.FIN2	1.416	0.039	0.1401	0.0027	0.23889	7.13776	0.137559	0.0737	0.0021	895	16	845	15	1025	60	1025	60	0.0591716	0.0585366	141
260216_2B__100.FIN2	1.682	0.021	0.1685	0.002	0.565	5.93472	0.0704418	0.07276	0.00085	1000.6	7.9	1004	11	1000	23	1000	23	-0.00338645	0.023	59.1
260216_2B__101.FIN2	2.406	0.031	0.211	0.0022	0.44689	4.73934	0.0494149	0.08249	0.00095	1243.5	9.3	1234	12	1261	23	1261	23	0.00769854	0.0182395	42.4
260216_2B__102.FIN2	1.691	0.027	0.1685	0.0019	0.56412	5.93472	0.0669197	0.07263	0.00094	1003	10	1004	11	1002	26	1002	26	-0.000996016	0.0259481	49.5
260216_2B__103.FIN2	2.002	0.024	0.1834	0.0018	0.6364	5.45256	0.0535148	0.07926	0.00077	1115	8.2	1085.3	9.9	1177	19	1177	19	0.0273657	0.0161427	60.6
260216_2B__104.FIN2	2.376	0.036	0.195	0.0019	0.40917	5.12821	0.0499671	0.0883	0.0013	1234	11	1148	10	1384	27	1384	27	0.0749129	0.0195087	101.7
260216_2B__105.FIN2	1.662	0.016	0.1657	0.0014	0.7027	6.035	0.0509898	0.07271	0.00051	993.4	6	988	7.6	1005	14	1005	14	0.00546559	0.0139303	294
260216_2B__106.FIN2	1.966	0.033	0.1756	0.0027	0.8338	5.69476	0.0875618	0.08134	0.00076	1105	11	1045	14	1227	18	1227	18	0.0574163	0.0146699	831
260216_2B__107.FIN2	1.634	0.022	0.1648	0.0016	0.79308	6.06796	0.0589122	0.07171	0.00057	982.2	8.6	983.1	8.9	980	17	980	17	-0.000915471	0.0173469	141.5
260216_2B__108.FIN2	1.929	0.04	0.1816	0.0026	0.80664	5.50661	0.0788391	0.07684	0.00093	1088	14	1075	14	1113	25	1113	25	0.012093	0.0224618	63.8
260216_2B__109.FIN2	1.968	0.047	0.1889	0.0025	0.34201	5.29381	0.070061	0.0754	0.0017	1102	16	1115	14	1067	46	1067	46	-0.0116592	0.0431115	39.02
260216_2B__109.FIN2	1.648	0.043	0.168	0.0029	0.36836	5.95238	0.102749	0.0714	0.0018	987	16	1001	16	956	52	956	52	-0.013986	0.0543933	24.6
260216_2B__11.FIN2	2.07	0.026	0.1938	0.0015	0.69018	5.15996	0.0399378	0.07802	0.00072	1138.6	8.7	1142	8.2	1143	18	1143	18	-0.00297723	0.015748	87.8
260216_2B__110.FIN2	2.258	0.049	0.2006	0.0029	0.61901	4.98504	0.0720669	0.0814	0.0014	1197	15	1178	15	1226	33	1226	33	0.016129	0.0269168	51.6
260216_2B__110.FIN2	1.652	0.054	0.1646	0.0036	0.52658	6.07533	0.132875	0.073	0.002	988	21	982	20	1004	58	1004	58	0.00610998	0.0577689	52
260216_2B__111.FIN2	2.044	0.036	0.1941	0.0027	0.7465	5.15198	0.0716659	0.07627	0.00087	1128	12	1143	15	1100	22	1100	22	-0.0131234	0.02	46.1
260216_2B__112.FIN2	1.648	0.019	0.1624	0.0014	0.65861	6.15764	0.0530831	0.07355	0.00066	987.9	7.3	970.1	7.7	1025	18	1025	18	0.0183486	0.017561	165.5
260216_2B__113.FIN2	1.628	0.021	0.1635	0.0015	0.37309	6.11621	0.056112	0.07238	0.00094	979.8	8.1	975.9	8.1	988	26	988	26	0.00399631	0.0263158	43.4
260216_2B__114.FIN2	1.653	0.021	0.1649	0.0014	0.39177	6.06428	0.0514857	0.07258	0.00085	989.6	8	983.9	7.6	995	24	995	24	0.00579327	0.0241206	84.1
260216_2B__115.FIN2	4.45	0.13	0.2883	0.0057	0.71688	3.46861	0.0685781	0.1116	0.0023	1719	25	1632	29	1821	38	1821	38	0.0533088	0.0208677	163.2
260216_2B__115.FIN2	2.154	0.043	0.1903	0.0024	0.79037	5.25486	0.0662725	0.0822	0.001	1165	14	1123	13	1248	25	1248	25	0.0373998	0.0200321	66.7
260216_2B__116.FIN2	2.211	0.033	0.1984	0.0027	0.70923	5.04032	0.0685931	0.08045	0.00081	1184	11	1166	15	1206	20	1206	20	0.0154374	0.0165837	154.7
260216_2B__117.FIN2	2.236	0.03	0.2028	0.0019	0.53932	4.93097	0.0461974	0.07992	0.00091	1192.4	9.7	1190	10	1190	22	1190	22	0.00201681	0.0184874	80.3
260216_2B__118.FIN2	1.885	0.043	0.1803	0.003	0.49059	5.54631	0.0922847	0.0758	0.0015	1075	15	1069	16	1085	41	1085	41	0.00561272	0.037788	71.3
260216_2B__118.FIN2	1.623	0.023	0.1632	0.0024	0.23009	6.12745	0.0901096	0.0724	0.0013	978.8	9	975	13	992	36	992	36	0.00389744	0.0362903	80.3
260216_2B__119.FIN2	1.818	0.026	0.1799	0.0017	0.49552	5.55864	0.0525275	0.07318	0.00092	1050.5	9.4	1066.4	9.5	1019	26	1019	26	-0.01491	0.0255152	39.1
260216_2B__120.FIN2	2.305	0.05	0.203	0.0024	0.092703	4.92611	0.0582397	0.0824	0.0019	1212	15	1191	13	1245	46	1245	46	0.0176322	0.0369478	34.64
260216_2B__120.FIN2	1.606	0.052	0.1646	0.0046	0.044312	6.07533	0.169785	0.0711	0.0029	972	20	982	25	953	85	953	85	-0.0101833	0.089192	65.3
260216_2B__121.FIN2	2.023	0.025	0.1911	0.0016	0.58358	5.23286	0.0438126	0.07701	0.00077	1122	8.7	1127.1	8.9	1119	20	1119	20	-0.00452489	0.0178731	101.2
260216_2B__122.FIN2	1.781	0.02	0.171	0.0015	0.45237	5.84795	0.0512978	0.0756	0.00081	1038.4	7	1017.3	8.2	1082	21	1082	21	0.0207412	0.0194085	46.5
260216_2B__123.FIN2	2.224	0.027	0.2031	0.002	0.57768	4.92368	0.0484853	0.07948	0.00078	1187.9	8.5	1193	10	1184	20	1184	20	-0.00427494	0.0168919	181
260216_2B__124.FIN2	1.749	0.044	0.17	0.0024	0.53125	5.88235	0.083045	0.075	0.0017	1022	16	1012	13	1066	43	1066	43	0.00988142	0.0403377	11
260216_2B__125.FIN2	2.085	0.027	0.196	0.0021	0.502	5.10204	0.0546647	0.07722	0.00091	1142.7	8.8	1153	11	1122	24	1122	24	-0.00893322	0.0213904	69.1
260216_2B__125.FIN2	1.743	0.076	0.1742	0.0056	0.56702	5.74053	0.184541	0.0729	0.0028	1023	28	1035	31	1004	77	1004	77	-0.0115942	0.0766932	247
260216_2B__126.FIN2	1.654	0.023	0.1654	0.002	0.3744	6.04595	0.073107	0.07246	0.00099	990.1	8.8	987	11	1001	29	1001	29	0.00314083	0.028971	40.2
260216_2B__127.FIN2	1.709	0.029	0.1676	0.0023	0.50228	5.96659	0.0818804	0.074	0.0012	1010	11	998	12	1035	32	1035	32	0.012024	0.0309179	61.4
260216_2B__128.FIN2	2.208	0.046	0.1995	0.0031	0.39877	5.01253	0.077889	0.0804	0.0016	1182	14	1172	17	1198	41	1198	41	0.00853242	0.0342237	14.66
260216_2B__128.FIN2	1.65	0.039	0.1655	0.0025	0.11773	6.0423	0.0912734	0.0723	0.0021	988	15	987	14	993	55	993	55	0.00101317	0.0553877	22.87
260216_2B__129.FIN2	2.269	0.038	0.1996	0.0025	0.66751	5.01002	0.0627508	0.0825	0.001	1201	12	1173	13	1254	25	1254	25	0.0238704	0.0199362	56.5
260216_2B__13.FIN2	2.515	0.055	0.2192	0.0035	0.77189	4.56204	0.0728429	0.0836	0.0011	1275	16	1278	18	1280	27	1280	27	-0.00234742	0.0210938	159.2
260216_2B__13.FIN2	1.782	0.038	0.1753	0.0033	0.6218	5.70451	0.107387	0.0745	0.0013	1038	14	1041	18	1051	35	1051	35	-0.00288184	0.0333016	39.7
260216_2B__130.FIN2	1.625	0.016	0.1658	0.0017	0.60779	6.03136	0.0618415	0.07136	0.00063	979.8	6.4	988.5	9.2	966	18	966	18	-0.00880121	0.0186335	116.4
260216_2B__131.FIN2	1.662	0.04	0.1712	0.0028	0.3705	5.84112	0.0955324	0.0708	0.0017	993	15	1018	16	955	44	955	44	-0.024558	0.0460733	18.5
260216_2B__131.FIN2	1.86	0.023	0.18	0.0021	0.65204	5.55556	0.0648148	0.07504	0.00075	1066.2	8	1067	11	1066	20	1066	20	-0.000749766	0.0187617	186
260216_2B__132.FIN2	1.611	0.024	0.1635	0.0018	0.40293	6.11621	0.0673344	0.0721	0.001	972.9	9.2	975.6	9.8	980	29	980	29	-0.00276753	0.0295918	44.1
260216_2B__133.FIN2	2.234	0.065	0.2014	0.0034	0.16748	4.96524	0.0838224	0.0813	0.0026	1191	21	1182	18	1199	63	1199	63	0.00761421	0.0525438	2.82
260216_2B__133.FIN2	1.63	0.059	0.1644	0.0029	0.091951	6.08273	0.107299	0.0716	0.0025	979	23	981	16	975	81	975	81	-0.00203874	0.0830769	15.51
260216_2B__134.FIN2	1.828	0.035	0.1753	0.0017	0.35055	5.70451	0.0553204	0.076	0.0014	1053	13	1041.1	9.3	1082	37	1082	37	0.0114302	0.0341959	28.6
260216_2B__135.FIN2	2.16	0.032	0.1963	0.0027	0.60122	5.09424	0.0700686	0.0796	0.0011	1168	10	1155	15	1183	27	1183	27	0.0112554	0.0228233	61
260216_2B__135.FIN2	1.649	0.029	0.1689	0.0029	0.72773	5.92066	0.101657	0.07117	0.00088	989	11	1006	16	960	25	960	25	-0.0168986	0.0260417	72.9
260216_2B__136.FIN2	1.631	0.038	0.1619	0.002	0.023142	6.17665	0.0763021	0.0735	0.0019	981	14	967	11	999	54	999	54	0.0144778	0.0540541	29.7
260216_2B__137.FIN2	1.633	0.018	0.1617	0.0012	0.41448	6.18429	0.0458946	0.07338	0.00081	982.8	7.3	966	6.6	1018	22	1018	22	0.0173913	0.021611	70.1
260216_2B__138.FIN2	1.698	0.034	0.1692	0.0025	0.59993	5.91017	0.0873251	0.0731	0.0012	1007	13	1007	14	1018	33	1018	33	0	0.0324165	26.6
260216_2B__139.FIN2	1.734	0.034	0.1708	0.0019	0.15039	5.8548	0.0651295	0.0738	0.0016	1018	13	1016	10	1024	44	1024	44	0.0019685	0.0429688	2.43
260216_2B__14.FIN2	1.988	0.054	0.1872	0.0026	0.18781	5.34188	0.0741928	0.0776	0.0021	1105	18	1105	14	1111	56	1111	56	0	0.050405	14.64
260216_2B__140.FIN2	2.248	0.029	0.2065	0.0018	0.67023	4.84262	0.0422117	0.07919	0.00071	1196.9	8.6	1210.1	9.7	1175	18	1175	18	-0.0109082	0.0153191	190.5
260216_2B__141.FIN2	1.677	0.021	0.1676	0.0015	0.4241	5.96659	0.0534002	0.07271	0.00088	998.7	8.1	998.5	8.1	998	25	998	25	0.0002003	0.0250501	42.8
260216_2B__142.FIN2	1.609	0.017	0.1613	0.0016	0.60733	6.19963	0.0614966	0.07257	0.00066	972.9	6.6	963.7	8.8	998	18	998	18	0.00954654	0.0180361	71.7
260216_2B__143.FIN2	1.978	0.067	0.191	0.0036	0.37424	5.2356	0.0986815	0.0754	0.0024	1106	23	1126	19	1066	63	1066	63	-0.017762	0.0590994	37.67
260216_2B__143.FIN2	1.666	0.032	0.1664	0.0024	0.33518	6.00962	0.0866771	0.0728	0.0015	994	12	995	14	1000	41	1000	41	-0.00100503	0.041	79.6
260216_2B__144.FIN2	1.61	0.017	0.1628	0.0014	0.41513	6.14251	0.0528225	0.07179	0.00075	973.5	6.6	972.3	8	977	22	977	22	0.00123419	0.0225179	37.8
260216_2B__15.FIN2	1.641	0.016	0.1667	0.0013	0.56195	5.9988	0.0467813	0.07173	0.00061	985.4	6	993.7	7.3	977	17	977	17	-0.00835262	0.0174002	269.8
260216_2B__16.FIN2	1.443	0.043	0.1435	0.0059	0.72064	6.96864	0.286516	0.0733	0.0021	906	18	864	33	1019	57	1019	57	0.0486111	0.0559372	132.9
260216_2B__16.FIN2	1.945	0.021	0.1858	0.0021	0.69186	5.38213	0.0608314	0.0764	0.00068	1096	7.3	1099	11	1103	18	1103	18	-0.00272975	0.0163191	215.9
260216_2B__17.FIN2	1.632	0.017	0.1654	0.0018	0.62655	6.04595	0.0657963	0.07208	0.00067	981.7	6.6	987	10	986	19	986	19	-0.00536981	0.0192698	81
260216_2B__18.FIN2	1.712	0.024	0.1684	0.0017	0.50815	5.93824	0.0599466	0.07408	0.0009	1011.6	8.9	1003.2	9.1	1040	24	1040	24	0.00837321	0.0230769	30.7
260216_2B__19.FIN2	2.148	0.03	0.2007	0.0025	0.6877	4.98256	0.0620648	0.07798	0.00084	1163.3	9.7	1179	13	1143	21	1143	21	-0.0133164	0.0183727	56.5
260216_2B__2.FIN2	1.61	0.021	0.1643	0.0016	0.43058	6.08643	0.0592714	0.07165	0.00093	972.7	8.1	980.5	9	978	25	978	25	-0.00795512	0.0255624	56.1
260216_2B__20.FIN2	1.584	0.027	0.16	0.0022	0.64359	6.25	0.0859375	0.07219	0.00099	962	10	956	12	982	28	982	28	0.00627615	0.0285132	81.9
260216_2B__21.FIN2	1.65	0.024	0.1656	0.0022	0.55189	6.03865	0.0802236	0.07259	0.00094	988.9	9.3	987	12	997	27	997	27	0.00192503	0.0270812	35.03
260216_2B__22.FIN2	1.657	0.037	0.1666	0.0022	0.25547	6.0024	0.0792634	0.0722	0.0016	988	14	993	12	978	47	978	47	-0.00503525	0.0480573	16
260216_2B__23.FIN2	1.661	0.02	0.1648	0.0016	0.58021	6.06796	0.0589122	0.07344	0.00076	992.8	7.5	983.3	8.9	1023	20	1023	20	0.00966134	0.0195503	146.1
260216_2B__24.FIN2	2.207	0.022	0.2003	0.0018	0.60674	4.99251	0.0448653	0.08011	0.00067	1182.5	6.9	1177	9.5	1197	17	1197	17	0.0046729	0.0142022	87.5
260216_2B__25.FIN2	1.64	0.023	0.1589	0.0018	0.56848	6.29327	0.0712894	0.0754	0.00093	985.1	8.9	950	10	1072	25	1072	25	0.0369474	0.0233209	22.9
260216_2B__26.FIN2	1.987	0.037	0.1848	0.0034	0.70037	5.41126	0.0995577	0.0782	0.0011	1109	13	1093	19	1146	29	1146	29	0.0146386	0.0253054	105.8
260216_2B__27.FIN2	3.133	0.048	0.2507	0.0034	0.67379	3.98883	0.0540966	0.0911	0.0011	1438	12	1441	17	1442	23	1442	23	-0.00208189	0.0159501	159.2
260216_2B__28.FIN2	1.561	0.028	0.151	0.0023	0.82769	6.62252	0.100873	0.07512	0.00075	953	11	906	13	1067	20	1067	20	0.0518764	0.0187441	84.6
260216_2B__29.FIN2	1.645	0.023	0.1646	0.0019	0.57026	6.07533	0.0701284	0.07298	0.00094	986.2	8.9	982	11	1008	26	1008	26	0.00427699	0.0257937	15.1
260216_2B__3.FIN2	1.724	0.025	0.1685	0.0019	0.56047	5.93472	0.0669197	0.07492	0.00091	1015.9	9.1	1003	10	1059	24	1059	24	0.0128614	0.0226629	39.3
260216_2B__30.FIN2	1.667	0.028	0.1663	0.0026	0.77301	6.01323	0.0940132	0.07297	0.00083	995	11	991	15	1009	23	1009	23	0.00403633	0.0227948	37.5
260216_2B__31.FIN2	2.39	0.05	0.218	0.0045	0.73933	4.58716	0.094689	0.0794	0.0013	1238	15	1271	24	1179	32	1179	32	-0.0259638	0.0271416	179
260216_2B__32.FIN2	1.699	0.02	0.1678	0.002	0.58934	5.95948	0.0710307	0.07364	0.00082	1007.3	7.4	1000	11	1028	22	1028	22	0.0073	0.0214008	201
260216_2B__33.FIN2	1.66	0.051	0.1665	0.0035	0.42773	6.00601	0.126252	0.0726	0.0021	992	20	993	19	993	59	993	59	-0.00100705	0.0594159	127
260216_2B__33.FIN2	1.903	0.032	0.1803	0.0029	0.76894	5.54631	0.0892086	0.07675	0.00086	1082	11	1068	16	1110	22	1110	22	0.0131086	0.0198198	73.8
260216_2B__34.FIN2	1.698	0.025	0.1679	0.0019	0.4595	5.95593	0.0673988	0.0733	0.001	1007.5	9.7	1000	11	1015	28	1015	28	0.0075	0.0275862	24.59
260216_2B__35.FIN2	1.808	0.025	0.1737	0.0021	0.48096	5.75705	0.0696017	0.0755	0.001	1046.9	9.1	1032	11	1077	26	1077	26	0.014438	0.0241411	120.5
260216_2B__36.FIN2	1.708	0.027	0.1669	0.0015	0.35522	5.99161	0.0538491	0.0742	0.0011	1011	10	995.7	8.5	1035	31	1035	31	0.0153661	0.0299517	23.7
260216_2B__37.FIN2	1.717	0.053	0.1684	0.0046	0.7097	5.93824	0.162209	0.0741	0.0016	1013	20	1003	25	1052	38	1052	38	0.00997009	0.0361217	102.5
260216_2B__37.FIN2	2.002	0.034	0.1821	0.0027	0.78527	5.49149	0.0814224	0.07955	0.00087	1115	12	1078	15	1183	22	1183	22	0.0343228	0.0185968	199
260216_2B__38.FIN2	1.777	0.026	0.1722	0.0018	0.72112	5.8072	0.0607024	0.07471	0.00074	1035.3	9.4	1024	10	1056	20	1056	20	0.0110352	0.0189394	53.8
260216_2B__39.FIN2	1.733	0.022	0.1708	0.0015	0.29493	5.8548	0.051418	0.0737	0.00099	1019.8	8.2	1016.5	8.3	1024	27	1024	27	0.00324643	0.0263672	69.32
260216_2B__4.FIN2	1.521	0.024	0.1488	0.002	0.4316	6.72043	0.0903284	0.075	0.0012	937.6	9.8	894	11	1060	32	1060	32	0.0487696	0.0301887	28.45
260216_2B__40.FIN2	1.683	0.021	0.1656	0.0014	0.44882	6.03865	0.0510514	0.07365	0.00086	1001	7.9	987.4	7.9	1025	23	1025	23	0.0137735	0.022439	108.2
260216_2B__41.FIN2	2.159	0.037	0.1945	0.0021	0.4114	5.14139	0.0555111	0.0804	0.0013	1165	12	1145	11	1195	32	1195	32	0.0174672	0.0267782	55.41
260216_2B__42.FIN2	1.663	0.03	0.1678	0.0025	0.27298	5.95948	0.0887884	0.072	0.0014	994	12	1000	14	978	41	978	41	-0.006	0.0419223	40.3
260216_2B__42.FIN2	2.118	0.033	0.1958	0.0029	0.73073	5.10725	0.0756437	0.07794	0.00083	1154	11	1152	16	1148	23	1148	23	0.00173611	0.0200348	81.9
260216_2B__43.FIN2	1.667	0.037	0.1659	0.0029	0.40878	6.02773	0.105367	0.073	0.0016	994	14	989	16	1001	46	1001	46	0.00505561	0.045954	14.5
260216_2B__43.FIN2	1.984	0.023	0.1816	0.0019	0.3601	5.50661	0.0576132	0.07896	0.00099	1109.8	7.7	1076	10	1168	25	1168	25	0.0314126	0.0214041	101
260216_2B__44.FIN2	2.006	0.038	0.1879	0.0022	0.35532	5.32198	0.0623116	0.0772	0.0015	1116	13	1110	12	1116	39	1116	39	0.00540541	0.0349462	41.6
260216_2B__44.FIN2	1.642	0.029	0.1662	0.0026	0.66417	6.01685	0.0941264	0.07162	0.00099	986	11	991	14	971	28	971	28	-0.00504541	0.0288363	67
260216_2B__45.FIN2	1.74	0.032	0.1714	0.0022	0.37996	5.83431	0.0748861	0.0737	0.0013	1022	12	1019	12	1027	35	1027	35	0.00294406	0.0340798	28.4
260216_2B__46.FIN2	2.133	0.032	0.1962	0.0026	0.64706	5.09684	0.0675422	0.07845	0.00095	1159	10	1154	14	1159	23	1159	23	0.00433276	0.0198447	53.17
260216_2B__46.FIN2	1.646	0.028	0.1661	0.0033	0.45019	6.02047	0.119612	0.0719	0.0014	987	11	990	18	978	39	978	39	-0.0030303	0.0398773	48.3
260216_2B__47.FIN2	1.724	0.024	0.1678	0.0017	0.53429	5.95948	0.0603761	0.07425	0.0009	1016	8.9	999.9	9.6	1041	25	1041	25	0.0161016	0.0240154	107.7
260216_2B__48.FIN2	1.657	0.021	0.1655	0.0016	0.57083	6.0423	0.0584149	0.07227	0.00078	991.9	8.2	986.9	9	987	22	987	22	0.00506637	0.0222898	95.3
260216_2B__49.FIN2	2.345	0.032	0.2082	0.0023	0.7646	4.80307	0.0530599	0.08138	0.00075	1226	10	1219	12	1228	18	1228	18	0.00574241	0.014658	141.4
260216_2B__49.FIN2	1.706	0.044	0.1702	0.0048	0.59142	5.87544	0.1657	0.0727	0.0018	1010	17	1013	26	999	52	999	52	-0.0029615	0.0520521	435
260216_2B__5.FIN2	1.699	0.037	0.1692	0.0021	0.1293	5.91017	0.0733531	0.0732	0.0017	1006	14	1007	11	1018	47	1018	47	-0.000993049	0.046169	16.3
260216_2B__50.FIN2	1.691	0.022	0.1698	0.0018	0.35897	5.88928	0.0624305	0.07185	0.00098	1004	8.5	1011	9.9	975	28	975	28	-0.00692384	0.0287179	56.7
260216_2B__51.FIN2	2.07	0.026	0.1887	0.0019	0.76767	5.29942	0.0533593	0.07914	0.00065	1138.8	8.5	1114	10	1172	16	1172	16	0.0222621	0.0136519	268
260216_2B__52.FIN2	2.195	0.038	0.1964	0.0025	0.24795	5.09165	0.0648122	0.0804	0.0015	1178	12	1156	13	1202	37	1202	37	0.0190311	0.030782	66.2
260216_2B__52.FIN2	1.622	0.019	0.1623	0.0019	0.27944	6.16143	0.0721301	0.0725	0.0011	978.5	7.3	969	11	994	30	994	30	0.00980392	0.0301811	93.1
260216_2B__53.FIN2	1.692	0.026	0.1627	0.0027	0.60412	6.14628	0.101997	0.0751	0.0011	1004	9.8	971	15	1062	29	1062	29	0.0339856	0.027307	130.1
260216_2B__54.FIN2	1.627	0.018	0.1637	0.0013	0.57681	6.10874	0.0485116	0.07155	0.00065	979.7	6.9	977.3	7.4	969	19	969	19	0.00245575	0.0196078	59.7
260216_2B__55.FIN2	2.186	0.056	0.1979	0.0033	0.8584	5.05306	0.0842602	0.0792	0.0011	1173	17	1164	18	1172	27	1172	27	0.00773196	0.0230375	73.5
260216_2B__55.FIN2	1.764	0.053	0.1734	0.0047	0.57898	5.76701	0.156315	0.0735	0.0019	1031	19	1031	26	1022	52	1022	52	0	0.0508806	108
260216_2B__56.FIN2	2.19	0.033	0.1982	0.0023	0.76465	5.04541	0.0585491	0.07928	0.00067	1176	10	1165	13	1178	17	1178	17	0.00944206	0.0144312	109.3
260216_2B__57.FIN2	1.806	0.025	0.1712	0.0017	0.7347	5.84112	0.0580018	0.07583	0.00069	1046.1	9.1	1018.4	9.5	1086	19	1086	19	0.0271995	0.0174954	92.8
260216_2B__58.FIN2	1.491	0.036	0.1481	0.0048	0.12501	6.75219	0.218842	0.0724	0.0024	931	17	890	27	1008	76	1008	76	0.0460674	0.0753968	8.37
260216_2B__58.FIN2	2.41	0.027	0.2144	0.0022	0.59029	4.66418	0.04786	0.08089	0.00079	1246.2	8.4	1252	11	1216	19	1216	19	-0.00463259	0.015625	102.5
260216_2B__59.FIN2	1.899	0.028	0.1817	0.0027	0.62822	5.50358	0.0817813	0.07485	0.00099	1080.2	9.9	1076	15	1063	26	1063	26	0.00390335	0.0244591	320
260216_2B__59.FIN2	1.644	0.025	0.1613	0.0027	0.695	6.19963	0.103776	0.07336	0.00091	986.1	9.4	964	15	1019	25	1019	25	0.0229253	0.0245339	145.8
260216_2B__6.FIN2	1.66	0.02	0.1688	0.0014	0.51943	5.92417	0.0491341	0.07195	0.00075	992.3	7.6	1005.3	8	979	21	979	21	-0.0129315	0.0214505	103.3
260216_2B__60.FIN2	2.291	0.047	0.2041	0.003	0.60283	4.89956	0.072017	0.0807	0.0014	1207	14	1197	16	1213	32	1213	32	0.00835422	0.0263809	62.1
260216_2B__60.FIN2	1.893	0.039	0.1778	0.0026	0.45781	5.6243	0.0822451	0.0766	0.0015	1078	14	1055	14	1105	39	1105	39	0.0218009	0.0352941	96.9
260216_2B__61.FIN2	2.391	0.039	0.2103	0.0024	0.74622	4.75511	0.0542666	0.08171	0.0009	1238	11	1230	13	1234	22	1234	22	0.00650407	0.0178282	62.2
260216_2B__62.FIN2	1.631	0.033	0.1621	0.0023	0.48352	6.16903	0.087531	0.0722	0.0013	981	13	968	13	988	37	988	37	0.0134298	0.0374494	36
260216_2B__63.FIN2	1.704	0.021	0.1654	0.0017	0.4659	6.04595	0.062141	0.07399	0.00085	1008.7	8	986.3	9.4	1034	23	1034	23	0.0227111	0.0222437	42
260216_2B__64.FIN2	2.359	0.067	0.2115	0.0046	0.58532	4.72813	0.102834	0.08	0.0019	1229	20	1236	24	1192	47	1192	47	-0.00566343	0.0394295	72.8
260216_2B__64.FIN2	1.891	0.044	0.1793	0.0039	0.66346	5.57724	0.121312	0.0758	0.0014	1076	16	1063	22	1082	37	1082	37	0.0122295	0.0341959	213.7
260216_2B__65.FIN2	1.651	0.026	0.1629	0.002	0.37048	6.13874	0.0753681	0.073	0.0012	989.3	9.9	973	11	1008	33	1008	33	0.0167523	0.0327381	84.9
260216_2B__65.FIN2	2.091	0.03	0.1911	0.0023	0.69373	5.23286	0.0629806	0.07815	0.00082	1145.2	9.8	1127	12	1149	21	1149	21	0.0161491	0.0182768	140.1
260216_2B__66.FIN2	2.242	0.051	0.1977	0.0032	0.631	5.05817	0.0818722	0.081	0.0014	1196	17	1163	17	1217	34	1217	34	0.0283749	0.0279376	81.6
260216_2B__66.FIN2	1.643	0.031	0.1649	0.0025	0.57239	6.06428	0.0919388	0.0715	0.0012	986	12	984	14	967	34	967	34	0.00203252	0.0351603	205.5
260216_2B__67.FIN2	1.675	0.02	0.1643	0.0015	0.60859	6.08643	0.0555669	0.07294	0.00069	997.9	7.4	980.5	8.1	1008	19	1008	19	0.017746	0.0188492	69
260216_2B__68.FIN2	1.781	0.032	0.1692	0.0021	0.41106	5.91017	0.0733531	0.0756	0.0013	1034	10	1007	11	1069	33	1069	33	0.0268123	0.03087	276.3
260216_2B__69.FIN2	1.621	0.017	0.1608	0.0016	0.56076	6.21891	0.0618797	0.07222	0.00068	977.7	6.6	961.2	8.6	988	19	988	19	0.017166	0.0192308	84.3
260216_2B__7.FIN2	1.691	0.019	0.1696	0.0015	0.65017	5.89623	0.0521482	0.07291	0.00062	1004.1	7	1009.6	8.1	1008	17	1008	17	-0.0054477	0.0168651	18.17
260216_2B__70.FIN2	1.719	0.024	0.1696	0.002	0.71619	5.89623	0.069531	0.07254	0.00074	1015.2	9.2	1009	11	998	21	998	21	0.0061447	0.0210421	101.5
260216_2B__71.FIN2	1.631	0.023	0.1577	0.0015	0.51571	6.34115	0.0603154	0.07362	0.00097	981	8.9	943.8	8.4	1025	27	1025	27	0.0394151	0.0263415	56.5
260216_2B__72.FIN2	1.607	0.038	0.1578	0.0025	0.47446	6.33714	0.100398	0.0729	0.0016	971	15	945	14	1000	45	1000	45	0.0275132	0.045	21.68
260216_2B__73.FIN2	1.623	0.023	0.1586	0.0022	0.75781	6.30517	0.0874614	0.07342	0.00071	977.5	9	949	12	1021	20	1021	20	0.0300316	0.0195886	114.9
260216_2B__74.FIN2	1.567	0.022	0.1535	0.0019	0.7399	6.51466	0.0806375	0.07325	0.00069	955.9	8.7	920	11	1020	19	1020	19	0.0390217	0.0186275	186
260216_2B__75.FIN2	2.168	0.04	0.1982	0.0027	0.80199	5.04541	0.0687316	0.07851	0.00084	1168	13	1165	14	1154	22	1154	22	0.00257511	0.0190641	70.4
260216_2B__76.FIN2	2.2	0.033	0.2012	0.0021	0.59692	4.97018	0.0518756	0.07849	0.00096	1180	10	1182	11	1154	24	1154	24	-0.00169205	0.0207972	60.9
260216_2B__76.FIN2	1.619	0.029	0.1641	0.0027	0.57001	6.09385	0.100264	0.0711	0.0011	977	11	980	15	957	33	957	33	-0.00306122	0.0344828	101.7
260216_2B__77.FIN2	1.628	0.037	0.1611	0.0025	0.55094	6.20732	0.0963272	0.0726	0.0014	980	14	963	14	996	39	996	39	0.0176532	0.0391566	309.6
260216_2B__77.FIN2	1.941	0.028	0.188	0.0024	0.58139	5.31915	0.067904	0.07428	0.00092	1094.7	9.5	1110	13	1047	25	1047	25	-0.0137838	0.0238777	118.9
260216_2B__78.FIN2	1.905	0.073	0.184	0.0033	0.22783	5.43478	0.0974716	0.074	0.0027	1077	26	1088	18	1051	71	1051	71	-0.0101103	0.0675547	21
260216_2B__79.FIN2	1.661	0.028	0.1639	0.0018	0.49498	6.10128	0.0670061	0.0729	0.001	992	11	978	10	1012	30	1012	30	0.0143149	0.0296443	20.7
260216_2B__8.FIN2	1.682	0.015	0.1689	0.0012	0.67066	5.92066	0.0420651	0.07272	0.0005	1001	5.8	1006.2	6.5	1004	14	1004	14	-0.00516796	0.0139442	80.5
260216_2B__80.FIN2	1.713	0.022	0.1706	0.0017	0.50411	5.86166	0.0584105	0.07258	0.00086	1013.3	8.5	1014.9	9.5	998	25	998	25	-0.00157651	0.0250501	140
260216_2B__81.FIN2	1.588	0.021	0.1607	0.0016	0.40491	6.22278	0.0619567	0.07144	0.00094	964.1	8.2	960.2	9	961	27	961	27	0.00406165	0.0280957	90.3
260216_2B__82.FIN2	1.631	0.022	0.1618	0.0016	0.64117	6.18047	0.0611171	0.07295	0.00075	982	8.5	966.5	9	1010	21	1010	21	0.0160372	0.0207921	81.8
260216_2B__85.FIN2	1.65	0.025	0.1647	0.0016	0.50896	6.07165	0.0589838	0.0725	0.00095	988	9.5	982.9	8.6	991	27	991	27	0.00518873	0.0272452	50.9
260216_2B__86.FIN2	1.709	0.033	0.1677	0.0025	0.61677	5.96303	0.0888943	0.0737	0.0011	1011	12	999	14	1029	31	1029	31	0.012012	0.0301263	76.9
260216_2B__87.FIN2	1.652	0.018	0.1651	0.0015	0.48606	6.05694	0.0550297	0.07258	0.00076	989.3	7	984.7	8.4	997	21	997	21	0.00467147	0.0210632	41.5
260216_2B__88.FIN2	2.058	0.078	0.1951	0.0044	0.74788	5.12558	0.115595	0.0762	0.0019	1133	26	1149	24	1095	50	1095	50	-0.0139252	0.0456621	40.5
260216_2B__88.FIN2	1.599	0.028	0.1617	0.0022	0.6343	6.18429	0.08414	0.0718	0.001	968	11	966	12	974	29	974	29	0.00207039	0.0297741	51.58
260216_2B__89.FIN2	1.642	0.016	0.1635	0.001	0.41291	6.11621	0.037408	0.07295	0.00068	985.9	6.1	976.1	5.6	1008	19	1008	19	0.01004	0.0188492	110.7
260216_2B__9.FIN2	1.556	0.022	0.1576	0.0017	0.6375	6.34518	0.0684442	0.07262	0.00097	951.5	8.8	943.1	9.4	994	27	994	27	0.0089068	0.027163	64.4
260216_2B__90.FIN2	2.174	0.035	0.2003	0.002	0.23325	4.99251	0.0498503	0.0788	0.0013	1171	11	1177	11	1163	33	1163	33	-0.00509771	0.0283749	41.45
260216_2B__90.FIN2	1.738	0.042	0.1742	0.0038	0.026328	5.74053	0.125224	0.0728	0.0023	1022	16	1035	21	999	66	999	66	-0.0125604	0.0660661	32.5
260216_2B__91.FIN2	2.247	0.044	0.2071	0.0059	0.66306	4.82859	0.13756	0.0787	0.0017	1196	14	1213	31	1162	43	1162	43	-0.0140148	0.0370052	97.6
260216_2B__91.FIN2	1.707	0.021	0.1664	0.0014	0.4696	6.00962	0.0505617	0.07461	0.00085	1010.5	7.8	992	8	1053	23	1053	23	0.0186492	0.0218424	122
260216_2B__92.FIN2	1.861	0.029	0.1794	0.0024	0.66339	5.57414	0.0745704	0.07508	0.00087	1066	10	1064	13	1068	23	1068	23	0.0018797	0.0215356	73.3
260216_2B__93.FIN2	1.659	0.02	0.1672	0.0012	0.40897	5.98086	0.0429248	0.07223	0.00082	992.8	7.3	996.8	6.7	989	22	989	22	-0.00401284	0.0222447	109
260216_2B__94.FIN2	3.242	0.094	0.2548	0.0044	0.67657	3.92465	0.0677726	0.0921	0.002	1466	23	1463	22	1468	41	1468	41	0.00205058	0.0279292	132.3
260216_2B__94.FIN2	2.109	0.022	0.1923	0.0014	0.62673	5.20021	0.037859	0.07957	0.00067	1150.9	7.3	1133.6	7.8	1184	17	1184	17	0.0152611	0.0143581	54.8
260216_2B__95.FIN2	1.74	0.023	0.1677	0.0016	0.49084	5.96303	0.0568923	0.07546	0.00092	1022.2	8.5	999.2	9	1076	24	1076	24	0.0230184	0.0223048	124.4
260216_2B__96.FIN2	2.354	0.03	0.2109	0.0019	0.71403	4.74158	0.042717	0.08137	0.00078	1227.3	9	1233	10	1226	19	1226	19	-0.00462287	0.0154976	113
260216_2B__97.FIN2	1.777	0.022	0.1707	0.0015	0.52342	5.85823	0.0514783	0.07561	0.00074	1035.7	8.1	1015.8	8.3	1083	19	1083	19	0.0195905	0.0175439	54.8
260216_2B__98.FIN2	1.981	0.03	0.1847	0.0024	0.4811	5.41419	0.0703522	0.078	0.0011	1109.5	9.9	1093	13	1143	27	1143	27	0.0150961	0.023622	150
260216_2B__99.FIN2	1.627	0.015	0.1624	0.0013	0.45216	6.15764	0.0492914	0.07306	0.00069	980.3	5.8	969.8	7.5	1013	19	1013	19	0.010827	0.0187562	65.9

## Sheet: Ch6
Analysis	Ratio 207Pb/235U	Error2S	Ratio 206Pb/238U	Error2S	rho	Ratio 238U/206Pb	Error2S	Ratio 207Pb/206Pb	Error2S	207Pb/235Pb Age (Ma)	Error2S	206Pb/238U Age (Ma)	Error2S	207Pb/206Pb Age (Ma)	Error2S	Prefered Age	Unc 2S	% disc. (6/8-7/5)	% Error 6/8 2S	Th/U
260216_3A__1.FIN2	1.907	0.029	0.1808	0.0025	0.67336	5.53097	0.0764792	0.07667	0.00084	1083	10	1071	14	1110	22	1110	22	0.0112045	0.0198198	65.3
260216_3A__10.FIN2	1.632	0.029	0.163	0.0018	0.27762	6.13497	0.0677481	0.0729	0.0013	980	11	973.1	9.8	994	37	994	37	0.00709074	0.0372233	51.58
260216_3A__100.FIN2	2.169	0.021	0.1963	0.0019	0.53357	5.09424	0.0493075	0.08036	0.00071	1170.5	6.9	1155	10	1204	17	1204	17	0.0134199	0.0141196	14.64
260216_3A__100.FIN2	2.58	0.07	0.2185	0.0045	0.71287	4.57666	0.0942561	0.0852	0.0016	1294	20	1274	24	1318	37	1318	37	0.0156986	0.0280728	63.8
260216_3A__102.FIN2	2.06	0.047	0.1901	0.0027	0.46188	5.26039	0.0747136	0.0786	0.0017	1135	16	1122	15	1149	43	1149	43	0.0115865	0.0374238	101.2
260216_3A__103.FIN2	2.094	0.029	0.1951	0.0021	0.47052	5.12558	0.0551702	0.07757	0.00095	1145.1	9.5	1149	11	1128	25	1128	25	-0.00339426	0.0221631	150
260216_3A__104.FIN2	2.022	0.037	0.1877	0.0025	0.54665	5.32765	0.0709596	0.0779	0.0015	1121	12	1109	13	1133	38	1133	38	0.0108206	0.0335393	56.5
260216_3A__105.FIN2	1.767	0.021	0.1717	0.0014	0.39608	5.82411	0.0474884	0.07437	0.00087	1032.6	7.8	1021.3	7.6	1045	23	1045	23	0.0110643	0.0220096	105.8
260216_3A__106.FIN2	2.064	0.025	0.1905	0.0019	0.69541	5.24934	0.0523557	0.07843	0.00069	1136.3	8.3	1124	10	1156	17	1156	17	0.0109431	0.0147059	81.9
260216_3A__106.FIN2	2.703	0.058	0.2257	0.0039	0.78965	4.43066	0.0765599	0.0863	0.0011	1328	16	1312	20	1344	26	1344	26	0.0121951	0.0193452	140.1
260216_3A__107.FIN2	2.046	0.032	0.1916	0.0019	0.54652	5.21921	0.0517562	0.0773	0.001	1130	11	1129	11	1120	26	1120	26	0.00088574	0.0232143	70.4
260216_3A__108.FIN2	1.733	0.022	0.169	0.0022	0.59833	5.91716	0.0770281	0.07448	0.00083	1019.5	8.3	1006	12	1051	23	1051	23	0.0134195	0.0218839	60.9
260216_3A__109.FIN2	1.609	0.02	0.1605	0.002	0.60798	6.23053	0.077639	0.07236	0.00084	972.7	7.9	961	11	991	23	991	23	0.0121748	0.0232089	53.17
260216_3A__109.FIN2	2.176	0.046	0.1966	0.0028	0.57571	5.08647	0.0724421	0.0798	0.0014	1173	15	1157	15	1191	36	1191	36	0.0138289	0.0302267	97.6
260216_3A__11.FIN2	1.591	0.017	0.1563	0.0012	0.22159	6.39795	0.0491206	0.07412	0.00089	965.8	6.7	935.9	6.6	1037	24	1037	24	0.0319479	0.0231437	15.51
260216_3A__110.FIN2	2.187	0.032	0.1967	0.0025	0.56035	5.08388	0.0646147	0.0807	0.0011	1177	10	1157	14	1207	26	1207	26	0.0172861	0.021541	41.45
260216_3A__111.FIN2	2.071	0.031	0.1926	0.0023	0.54728	5.19211	0.0620034	0.0779	0.001	1137	10	1135	12	1135	27	1135	27	0.00176211	0.0237885	101
260216_3A__112.FIN2	1.62	0.033	0.164	0.0026	0.66725	6.09756	0.0966686	0.0717	0.0011	977	13	979	14	974	31	974	31	-0.0020429	0.0318275	268
260216_3A__112.FIN2	1.86	0.034	0.1772	0.0027	0.81096	5.64334	0.0859877	0.07583	0.00081	1066	12	1051	15	1088	21	1088	21	0.0142721	0.0193015	73.5
260216_3A__113.FIN2	1.721	0.021	0.1703	0.002	0.60493	5.87199	0.0689605	0.0735	0.00072	1015.4	7.7	1014	11	1023	20	1023	20	0.00138067	0.0195503	190.5
260216_3A__114.FIN2	2.039	0.024	0.1882	0.0017	0.36113	5.3135	0.0479965	0.07853	0.00094	1128.5	7.7	1111.4	9	1156	23	1156	23	0.015386	0.0198962	60.6
260216_3A__115.FIN2	2.191	0.043	0.2024	0.0028	0.70845	4.94071	0.0683498	0.0786	0.0011	1175	14	1187	15	1153	28	1153	28	-0.0101095	0.0242845	109.3
260216_3A__116.FIN2	2.07	0.023	0.1924	0.0015	0.59401	5.19751	0.0405211	0.07811	0.00071	1138	7.5	1134	8.3	1153	18	1153	18	0.00352734	0.0156114	179
260216_3A__117.FIN2	1.666	0.022	0.1653	0.0015	0.62937	6.04961	0.0548966	0.07304	0.00075	994.4	8.2	986.1	8.5	1010	21	1010	21	0.008417	0.0207921	199
260216_3A__118.FIN2	1.82	0.034	0.1762	0.0023	0.38391	5.67537	0.0740826	0.0752	0.0014	1051	12	1046	13	1067	38	1067	38	0.00478011	0.0356139	61
260216_3A__118.FIN2	2.027	0.057	0.191	0.0033	0.37643	5.2356	0.090458	0.077	0.0021	1127	18	1127	18	1109	56	1109	56	0	0.0504959	54.8
260216_3A__119.FIN2	1.624	0.018	0.1624	0.0016	0.51682	6.15764	0.0606664	0.07305	0.00072	980.1	7.3	970	8.6	1012	20	1012	20	0.0104124	0.0197628	181
260216_3A__12.FIN2	1.714	0.047	0.1685	0.0044	0.50768	5.93472	0.154972	0.0742	0.0019	1012	18	1003	24	1039	53	1039	53	0.00897308	0.0510106	56.7
260216_3A__12.FIN2	2.092	0.035	0.1916	0.0028	0.38409	5.21921	0.0762723	0.0792	0.0014	1145	11	1130	15	1172	34	1172	34	0.0132743	0.0290102	37.8
260216_3A__120.FIN2	2.219	0.037	0.2028	0.0022	0.66409	4.93097	0.0534917	0.07954	0.00095	1186	12	1190	12	1178	24	1178	24	-0.00336134	0.0203735	80.3
260216_3A__121.FIN2	2.148	0.034	0.1979	0.0022	0.63585	5.05306	0.0561734	0.0788	0.00094	1163	11	1164	12	1160	24	1160	24	-0.000859107	0.0206897	72.8
260216_3A__122.FIN2	1.964	0.055	0.1865	0.0038	0.76448	5.36193	0.109251	0.0764	0.0013	1099	19	1101	21	1098	34	1098	34	-0.00181653	0.0309654	55.41
260216_3A__123.FIN2	1.834	0.026	0.1749	0.0018	0.62135	5.71755	0.0588427	0.07625	0.00084	1057.2	9.2	1039	10	1098	23	1098	23	0.0175168	0.0209472	87.5
260216_3A__124.FIN2	1.63	0.016	0.1629	0.0013	0.57462	6.13874	0.0489893	0.07296	0.0006	981.5	6	972.8	7.2	1010	17	1010	17	0.00894326	0.0168317	14.66
260216_3A__125.FIN2	1.643	0.019	0.1653	0.0015	0.57934	6.04961	0.0548966	0.07254	0.0007	987	6.9	985.7	8.2	1000	20	1000	20	0.00131886	0.02	2.82
260216_3A__126.FIN2	2.007	0.027	0.1893	0.0022	0.37201	5.28262	0.0613934	0.0775	0.0011	1116.5	8.9	1117	12	1131	30	1131	30	-0.000447628	0.0265252	66.2
260216_3A__127.FIN2	1.862	0.037	0.1746	0.0031	0.76758	5.72738	0.101689	0.07703	0.00073	1064	13	1037	17	1117	19	1117	19	0.0260366	0.0170098	154.7
260216_3A__128.FIN2	1.668	0.036	0.1693	0.0021	0.38256	5.90667	0.0732665	0.0726	0.0015	996	14	1008	11	982	42	982	42	-0.0119048	0.0427699	62.1
260216_3A__129.FIN2	1.851	0.02	0.179	0.0016	0.72253	5.58659	0.049936	0.0755	0.00059	1063.8	7.2	1061.4	8.9	1081	16	1081	16	0.00226116	0.0148011	102.5
260216_3A__13.FIN2	2.112	0.024	0.1932	0.0017	0.48992	5.17598	0.0455444	0.07943	0.00091	1151.7	7.8	1138.2	9.3	1177	22	1177	22	0.0118608	0.0186916	269.8
260216_3A__130.FIN2	2.142	0.034	0.1991	0.0026	0.7459	5.0226	0.065589	0.07809	0.00093	1160	11	1170	14	1148	23	1148	23	-0.00854701	0.0200348	81.6
260216_3A__131.FIN2	1.638	0.028	0.1644	0.0017	0.36343	6.08273	0.0628992	0.073	0.0012	983	11	980.9	9.5	1004	34	1004	34	0.00214089	0.0338645	51.6
260216_3A__132.FIN2	2.002	0.041	0.191	0.0025	0.3744	5.2356	0.0685288	0.0766	0.0015	1113	14	1126	13	1102	38	1102	38	-0.0115453	0.0344828	113
260216_3A__133.FIN2	2.038	0.021	0.1893	0.0017	0.69033	5.28262	0.0474403	0.07857	0.00065	1127.6	6.9	1117.6	9.4	1162	16	1162	16	0.00894775	0.0137694	831
260216_3A__134.FIN2	1.624	0.028	0.1659	0.0028	0.54651	6.02773	0.101734	0.0718	0.0011	979	11	989	15	977	32	977	32	-0.0101112	0.0327533	141.4
260216_3A__134.FIN2	2.261	0.038	0.2026	0.0025	0.67865	4.93583	0.0609061	0.0816	0.001	1201	12	1189	14	1233	24	1233	24	0.0100925	0.0194647	62.2
260216_3A__135.FIN2	2.384	0.035	0.2075	0.0025	0.74208	4.81928	0.0580636	0.08396	0.00082	1238	11	1215	13	1289	19	1289	19	0.01893	0.0147401	66.7
260216_3A__136.FIN2	2.166	0.032	0.2029	0.0023	0.70079	4.92854	0.0558681	0.07795	0.00093	1170	10	1191	12	1139	24	1139	24	-0.0176322	0.0210711	56.5
260216_3A__137.FIN2	1.67	0.047	0.1656	0.0025	0.43225	6.03865	0.0911632	0.0734	0.0017	995	18	988	14	1016	47	1016	47	0.00708502	0.0462598	42.4
260216_3A__137.FIN2	2.14	0.057	0.1973	0.003	0.5617	5.06842	0.0770668	0.0788	0.0017	1160	19	1165	18	1161	44	1161	44	-0.00429185	0.0378984	159.2
260216_3A__139.FIN2	1.755	0.048	0.1731	0.0026	0.62323	5.77701	0.0867719	0.0743	0.0016	1027	18	1029	14	1041	43	1041	43	-0.00194363	0.0413064	159.2
260216_3A__139.FIN2	2.192	0.036	0.2033	0.0029	0.34212	4.91884	0.0701654	0.0791	0.0015	1178	11	1193	16	1169	37	1169	37	-0.0125733	0.031651	132.3
260216_3A__14.FIN2	1.588	0.038	0.161	0.0024	0.33159	6.21118	0.092589	0.0718	0.0017	964	15	962	14	971	49	971	49	0.002079	0.0504634	48.3
260216_3A__14.FIN2	2.098	0.048	0.1906	0.0023	0.26609	5.24659	0.0633114	0.0797	0.0018	1147	16	1124	12	1183	44	1183	44	0.0204626	0.0371936	16
260216_3A__140.FIN2	1.581	0.048	0.1636	0.0041	0.85373	6.11247	0.153185	0.07051	0.00094	961	19	976	23	941	27	941	27	-0.0153689	0.0286929	163.2
260216_3A__140.FIN2	2.096	0.031	0.1954	0.0022	0.61691	5.11771	0.05762	0.07856	0.0009	1146	10	1150	12	1157	23	1157	23	-0.00347826	0.019879
260216_3A__15.FIN2	1.902	0.029	0.1815	0.0019	0.67309	5.50964	0.0576767	0.07599	0.00086	1080	10	1075	11	1088	23	1088	23	0.00465116	0.0211397	40.3
260216_3A__16.FIN2	2.246	0.043	0.2008	0.0026	0.15721	4.98008	0.0644831	0.081	0.0017	1194	13	1180	14	1221	39	1221	39	0.0118644	0.031941	103.3
260216_3A__17.FIN2	1.576	0.045	0.1577	0.0026	0.39466	6.34115	0.104547	0.0723	0.0019	960	18	944	15	1001	47	1001	47	0.0169492	0.046953	141.5
260216_3A__18.FIN2	2.159	0.03	0.1918	0.0019	0.59864	5.21376	0.0516483	0.0816	0.00093	1166.3	9.7	1131	11	1230	22	1230	22	0.0312113	0.0178862	44.1
260216_3A__19.FIN2	1.777	0.056	0.1686	0.0041	0.4954	5.9312	0.144234	0.0766	0.0022	1035	21	1004	22	1104	58	1104	58	0.0308765	0.0525362	81.9
260216_3A__19.FIN2	2.195	0.041	0.1949	0.0025	0.43699	5.13084	0.0658137	0.0815	0.0014	1178	13	1147	14	1226	34	1226	34	0.027027	0.0277325	81
260216_3A__2.FIN2	2.2	0.025	0.199	0.0018	0.65651	5.02513	0.0454534	0.0804	0.00071	1179.9	7.8	1169.7	9.5	1203	17	1203	17	0.00872018	0.0141313	18.5
260216_3A__20.FIN2	1.982	0.036	0.1829	0.0021	0.37864	5.46747	0.0627757	0.0782	0.0013	1108	12	1082	11	1143	33	1143	33	0.0240296	0.0288714	84.3
260216_3A__21.FIN2	1.646	0.036	0.1617	0.0029	0.24552	6.18429	0.110912	0.0737	0.0017	987	14	966	16	1032	45	1032	45	0.0217391	0.0436047	36
260216_3A__21.FIN2	2.187	0.049	0.1999	0.0031	0.624	5.0025	0.0775776	0.0791	0.0014	1175	16	1174	17	1167	35	1167	35	0.000851789	0.0299914	43.4
260216_3A__22.FIN2	2.145	0.03	0.1934	0.0021	0.57483	5.17063	0.0561444	0.08045	0.00092	1163.4	9.6	1140	11	1206	22	1206	22	0.0205263	0.0182421	109
260216_3A__23.FIN2	2.219	0.032	0.1997	0.002	0.49616	5.00751	0.0501503	0.0802	0.001	1186	10	1174	11	1197	25	1197	25	0.0102215	0.0208855	50.9
260216_3A__24.FIN2	2.668	0.058	0.2293	0.0038	0.44943	4.3611	0.0722729	0.084	0.0017	1316	16	1330	20	1280	40	1280	40	-0.0105263	0.03125	80.3
260216_3A__25.FIN2	2.219	0.038	0.2014	0.0022	0.6174	4.96524	0.054238	0.0797	0.0011	1187	12	1183	12	1181	28	1181	28	0.00338123	0.0237087	22.87
260216_3A__26.FIN2	2.173	0.038	0.2004	0.0032	0.63	4.99002	0.079681	0.0783	0.0011	1172	12	1177	17	1151	29	1151	29	-0.00424809	0.0251955	127
260216_3A__26.FIN2	2.532	0.044	0.2191	0.0033	0.88567	4.56413	0.0687431	0.08314	0.00069	1280	13	1277	18	1275	15	1275	15	0.00234926	0.0117647	93.1
260216_3A__27.FIN2	2.014	0.023	0.1875	0.002	0.72298	5.33333	0.0568889	0.07757	0.00067	1119.3	7.9	1107	11	1133	17	1133	17	0.0111111	0.0150044	64.4
260216_3A__28.FIN2	2.104	0.022	0.193	0.0018	0.5619	5.18135	0.0483234	0.07863	0.00072	1149.1	7.1	1137.6	9.7	1161	18	1161	18	0.010109	0.0155039	84.1
260216_3A__29.FIN2	1.946	0.045	0.1839	0.0033	0.3454	5.43774	0.0975777	0.0767	0.0019	1096	15	1088	18	1105	50	1105	50	0.00735294	0.0452489	41.5
260216_3A__3.FIN2	1.621	0.033	0.1625	0.0027	0.56659	6.15385	0.102249	0.0727	0.0013	977	13	971	15	1001	36	1001	36	0.0061792	0.035964	24.6
260216_3A__30.FIN2	1.616	0.012	0.1613	0.0013	0.62993	6.19963	0.049966	0.07214	0.00049	975.9	4.8	963.9	7.2	987	14	987	14	0.0124494	0.0141844	35.03
260216_3A__31.FIN2	1.75	0.033	0.1679	0.0017	0.14732	5.95593	0.0603042	0.0753	0.0015	1026	12	1000.3	9.6	1069	41	1069	41	0.0256923	0.0383536	71.7
260216_3A__31.FIN2	2.044	0.037	0.1874	0.0025	0.46218	5.33618	0.071187	0.0783	0.0014	1130	12	1107	14	1153	34	1153	34	0.0207769	0.0294883	101.5
260216_3A__32.FIN2	0.018	0.0013	0.002542	8.4e-05	0.037716	393.391	12.9995	0.0515	0.0039	18.1	1.3	16.37	0.54	240	160	16.37	0.54	0.105681	0.0329872	42.8
260216_3A__33.FIN2	2.188	0.02	0.1971	0.0022	0.62535	5.07357	0.0566304	0.07979	0.00076	1176.6	6.6	1159	12	1189	19	1189	19	0.0151855	0.0159798	140
260216_3A__34.FIN2	2.156	0.033	0.1934	0.0019	0.14366	5.17063	0.0507973	0.0805	0.0014	1166	11	1139	10	1199	34	1199	34	0.023705	0.028357	32.5
260216_3A__36.FIN2	1.629	0.017	0.1594	0.0014	0.55955	6.27353	0.0551	0.07351	0.00068	980.9	6.6	953.5	8	1025	19	1025	19	0.0287362	0.0185366	435
260216_3A__37.FIN2	2.208	0.023	0.2025	0.0017	0.6534	4.93827	0.0414571	0.07854	0.00066	1183.1	7.1	1188.7	9	1158	17	1158	17	-0.00471103	0.0146805	79.6
260216_3A__38.FIN2	1.579	0.025	0.1611	0.003	0.43116	6.20732	0.115593	0.0708	0.0013	961.1	9.9	962	17	945	38	945	38	-0.000935551	0.0402116	59.1
260216_3A__38.FIN2	2.196	0.044	0.2031	0.0039	0.35319	4.92368	0.0945463	0.0776	0.0015	1179	14	1192	21	1134	39	1134	39	-0.010906	0.0343915	14.5
260216_3A__39.FIN2	2.12	0.027	0.1917	0.0018	0.28301	5.21648	0.0489811	0.0795	0.0011	1154.4	8.8	1130.4	9.9	1179	27	1179	27	0.0212314	0.0229008	49.5
260216_3A__4.FIN2	2.243	0.025	0.201	0.0019	0.56737	4.97512	0.0470285	0.08107	0.00076	1193.9	7.7	1180	10	1224	19	1224	19	0.0117797	0.0155229	101.7
260216_3A__40.FIN2	2.12	0.054	0.1957	0.0028	-0.13584	5.10986	0.0731099	0.0782	0.0024	1154	18	1152	15	1139	65	1139	65	0.00173611	0.0570676	127.7
260216_3A__40.FIN2	2.56	0.046	0.2204	0.0032	0.78306	4.53721	0.0658759	0.08368	0.00089	1287	13	1283	17	1282	21	1282	21	0.00311769	0.0163807	247
260216_3A__41.FIN2	1.577	0.028	0.1561	0.0015	0.4173	6.40615	0.0615581	0.0726	0.0012	959	11	935.1	8.6	992	34	992	34	0.0255588	0.0342742	52
260216_3A__42.FIN2	2.191	0.041	0.1964	0.0029	0.52413	5.09165	0.0751822	0.0804	0.0014	1175	13	1155	16	1198	33	1198	33	0.017316	0.0275459	80.5
260216_3A__43.FIN2	1.589	0.027	0.1573	0.0021	0.54326	6.35728	0.0848715	0.0728	0.0011	965	10	941	12	1004	30	1004	30	0.0255048	0.0298805	294
260216_3A__43.FIN2	1.981	0.036	0.181	0.0024	0.48847	5.52486	0.0732578	0.0783	0.0014	1108	12	1072	13	1148	34	1148	34	0.0335821	0.0296167	8.37
260216_3A__44.FIN2	2.108	0.034	0.1918	0.002	0.40783	5.21376	0.0543667	0.0795	0.0011	1149	11	1131	11	1173	29	1173	29	0.0159151	0.0247229	69
260216_3A__45.FIN2	1.978	0.06	0.1864	0.0047	0.33474	5.36481	0.135271	0.0768	0.0025	1106	21	1101	26	1102	65	1102	65	0.00454133	0.0589837	84.9
260216_3A__45.FIN2	2.191	0.03	0.2012	0.0024	0.15294	4.97018	0.0592864	0.0786	0.0013	1179	9.9	1181	13	1154	34	1154	34	-0.00169348	0.0294627	110.7
260216_3A__46.FIN2	1.673	0.039	0.1657	0.0031	0.85243	6.035	0.112906	0.07282	0.00087	997	15	988	17	1007	24	1007	24	0.00910931	0.0238332	15.1
260216_3A__46.FIN2	2.199	0.031	0.1972	0.0023	0.50789	5.07099	0.0591445	0.0801	0.001	1179.7	9.9	1160	12	1197	25	1197	25	0.0169828	0.0208855	18.17
260216_3A__48.FIN2	2.39	0.038	0.2146	0.0033	0.8228	4.65983	0.0716563	0.08061	0.00074	1238	11	1252	18	1214	18	1214	18	-0.0111821	0.014827	37.5
260216_3A__49.FIN2	2.108	0.022	0.1887	0.0017	0.4072	5.29942	0.0477425	0.08045	0.00086	1150.9	7.1	1113.9	9.5	1205	21	1205	21	0.0332166	0.0174274	81.8
260216_3A__5.FIN2	2.078	0.024	0.1913	0.0016	0.34965	5.22739	0.043721	0.07894	0.0009	1141.4	7.6	1128	8.9	1170	22	1170	22	0.0118794	0.0188034	72.9
260216_3A__50.FIN2	1.635	0.023	0.1627	0.0016	0.35021	6.14628	0.0604428	0.0726	0.001	983.4	8.9	971.5	8.8	997	28	997	28	0.0122491	0.0280843	20.7
260216_3A__51.FIN2	1.634	0.017	0.1614	0.0013	0.31245	6.19579	0.0499041	0.07315	0.00082	982.5	6.6	964.3	7.2	1012	23	1012	23	0.0188738	0.0227273	65.9
260216_3A__52.FIN2	2.187	0.039	0.1993	0.0028	0.46351	5.01756	0.0704926	0.0795	0.0013	1174	12	1171	15	1171	33	1171	33	0.00256191	0.028181	24.59
260216_3A__53.FIN2	1.603	0.029	0.1622	0.0017	0.10993	6.16523	0.0646171	0.0715	0.0014	970	11	968.6	9.7	958	39	958	39	0.00144539	0.0407098	70.1
260216_3A__54.FIN2	1.602	0.02	0.1589	0.0014	0.54694	6.29327	0.0554473	0.07279	0.00077	969.7	7.7	950.3	7.7	1005	21	1005	21	0.0204146	0.0208955	26.6
260216_3A__55.FIN2	2.149	0.032	0.196	0.0019	0.58872	5.10204	0.0494586	0.0791	0.001	1163	10	1153	10	1168	25	1168	25	0.00867303	0.0214041	16.3
260216_3A__56.FIN2	2.128	0.027	0.1951	0.002	0.65253	5.12558	0.0525431	0.07884	0.0008	1156.6	8.9	1149	11	1163	20	1163	20	0.00661445	0.0171969	132.9
260216_3A__57.FIN2	2.145	0.031	0.197	0.0023	0.67972	5.07614	0.0592646	0.07854	0.00081	1164.2	9.6	1159	12	1160	22	1160	22	0.00448663	0.0189655	145.8
260216_3A__58.FIN2	2.183	0.021	0.1974	0.0014	0.40099	5.06586	0.0359281	0.08009	0.00077	1174.7	6.6	1161.4	7.5	1195	19	1195	19	0.0114517	0.0158996	39.1
260216_3A__59.FIN2	2.225	0.027	0.2035	0.0019	0.72275	4.914	0.0458801	0.07904	0.00067	1188	8.5	1194	10	1170	17	1170	17	-0.00502513	0.0145299	186
260216_3A__6.FIN2	1.906	0.045	0.183	0.0032	0.57267	5.46448	0.0955538	0.0758	0.0015	1080	16	1082	17	1074	41	1074	41	-0.00184843	0.038175	90.3
260216_3A__60.FIN2	2.205	0.024	0.2009	0.0017	0.52242	4.9776	0.0421201	0.07976	0.00078	1181.7	7.6	1180	9.4	1187	19	1187	19	0.00144068	0.0160067	114.9
260216_3A__61.FIN2	1.682	0.034	0.1666	0.0027	0.46983	6.0024	0.0972778	0.0731	0.0014	1000	13	993	15	1008	40	1008	40	0.00704935	0.0396825	108
260216_3A__61.FIN2	2.162	0.042	0.1971	0.0036	0.73889	5.07357	0.0926679	0.0793	0.0011	1168	13	1159	19	1176	27	1176	27	0.00776531	0.0229592	146.1
260216_3A__62.FIN2	2.166	0.027	0.1961	0.002	0.37456	5.09944	0.0520086	0.0801	0.001	1168.6	8.9	1154	11	1191	26	1191	26	0.0126516	0.0218304	69.32
260216_3A__63.FIN2	2.058	0.037	0.1888	0.0029	0.43874	5.29661	0.0813568	0.0793	0.0014	1132	12	1114	16	1169	34	1169	34	0.016158	0.0290847	2.43
260216_3A__64.FIN2	2.197	0.03	0.2007	0.0019	0.67157	4.98256	0.0471692	0.07942	0.00079	1178.3	9.5	1179	10	1178	20	1178	20	-0.000593723	0.0169779	141
260216_3A__65.FIN2	1.753	0.031	0.1707	0.0025	0.44106	5.85823	0.0857972	0.0746	0.0013	1027	11	1016	14	1053	35	1053	35	0.0108268	0.0332384	56.5
260216_3A__65.FIN2	2.261	0.074	0.2077	0.0045	0.5977	4.81464	0.104313	0.0787	0.0021	1198	23	1216	24	1157	55	1157	55	-0.0148026	0.0475367	165.5
260216_3A__66.FIN2	2.036	0.027	0.1877	0.0023	0.62562	5.32765	0.0652829	0.07853	0.00084	1126.9	9	1109	12	1158	21	1158	21	0.0161407	0.0181347	108.2
260216_3A__67.FIN2	2.308	0.023	0.2078	0.0018	0.73154	4.81232	0.0416852	0.08055	0.00058	1213.7	7.3	1217	9.4	1212	14	1212	14	-0.00271159	0.0115512	28.4
260216_3A__68.FIN2	2.189	0.024	0.2009	0.0021	0.58855	4.9776	0.0520307	0.07894	0.00077	1176.9	7.6	1180	11	1171	20	1171	20	-0.00262712	0.0170794	201
260216_3A__69.FIN2	2.136	0.06	0.1967	0.0049	0.91115	5.08388	0.126645	0.07889	0.00094	1156	20	1156	26	1165	24	1165	24	0	0.0206009	76.9
260216_3A__7.FIN2	1.966	0.026	0.1853	0.0017	0.4822	5.39665	0.0495106	0.07747	0.00098	1103.7	9.2	1095.4	9.2	1129	24	1129	24	0.00757714	0.0212578	116.4
260216_3A__70.FIN2	1.588	0.016	0.1606	0.0012	0.50045	6.22665	0.0465254	0.07171	0.00069	965.5	6.5	960.2	6.9	973	20	973	20	0.00551968	0.020555	42
260216_3A__71.FIN2	2.036	0.032	0.188	0.0023	0.54019	5.31915	0.0650747	0.0787	0.0011	1126	11	1110	12	1154	28	1154	28	0.0144144	0.0242634	23.7
260216_3A__72.FIN2	2.125	0.045	0.1938	0.0032	0.78157	5.15996	0.0852006	0.0795	0.001	1153	15	1141	17	1183	25	1183	25	0.0105171	0.0211327	61.4
260216_3A__73.FIN2	2.122	0.023	0.1928	0.0015	0.54183	5.18672	0.0403531	0.07988	0.00075	1156.7	7.4	1136.5	8.2	1192	18	1192	18	0.0177739	0.0151007	30.7
260216_3A__74.FIN2	1.879	0.022	0.177	0.002	0.61568	5.64972	0.0638386	0.0771	0.00076	1073.2	7.7	1051	11	1121	20	1121	20	0.0211227	0.0178412	107.7
260216_3A__74.FIN2	3.338	0.061	0.256	0.004	0.61489	3.90625	0.0610352	0.0944	0.0015	1489	14	1469	21	1512	31	1512	31	0.0136147	0.0205026	118.9
260216_3A__75.FIN2	1.607	0.027	0.1561	0.0024	0.55218	6.40615	0.098493	0.0748	0.0011	971	10	935	13	1052	31	1052	31	0.0385027	0.0294677	21
260216_3A__76.FIN2	1.971	0.019	0.1828	0.0015	0.56098	5.47046	0.0448889	0.07788	0.00064	1104.8	6.6	1082.2	8.3	1143	17	1143	17	0.0208834	0.0148731	39.7
260216_3A__77.FIN2	2.17	0.046	0.1957	0.0029	0.26401	5.10986	0.075721	0.0805	0.0018	1169	15	1152	15	1200	45	1200	45	0.0147569	0.0375	102.5
260216_3A__78.FIN2	2.163	0.036	0.1993	0.0025	0.5047	5.01756	0.0629398	0.0788	0.0012	1167	12	1171	13	1156	30	1156	30	-0.00341588	0.0259516	122
260216_3A__79.FIN2	2.126	0.034	0.1944	0.0024	0.52902	5.14403	0.0635066	0.0795	0.0012	1156	11	1145	13	1178	28	1178	28	0.00960699	0.0237691	53.8
260216_3A__8.FIN2	1.652	0.032	0.1597	0.0024	0.50435	6.26174	0.0941026	0.0754	0.0013	989	12	955	13	1073	35	1073	35	0.0356021	0.0326188	205.5
260216_3A__8.FIN2	2.148	0.06	0.193	0.004	0.5781	5.18135	0.107385	0.0807	0.0019	1163	19	1137	21	1208	48	1208	48	0.0228672	0.0397351	59.7
260216_3A__80.FIN2	1.608	0.028	0.1651	0.0026	0.39061	6.05694	0.0953848	0.0708	0.0013	972	11	985	14	948	36	948	36	-0.013198	0.0379747	39.3
260216_3A__80.FIN2	2.098	0.063	0.1943	0.0037	0.19895	5.14668	0.0980068	0.0782	0.0026	1146	21	1145	20	1139	65	1139	65	0.000873362	0.0570676	28.45
260216_3A__81.FIN2	1.625	0.027	0.1616	0.0026	0.55444	6.18812	0.0995613	0.0731	0.0012	978	10	965	14	1014	32	1014	32	0.0134715	0.0315582	130.1
260216_3A__82.FIN2	2.103	0.044	0.1918	0.0021	0.20732	5.21376	0.057085	0.0792	0.0016	1147	14	1131	12	1163	41	1163	41	0.0141468	0.0352537	11
260216_3A__83.FIN2	1.637	0.033	0.1643	0.0033	0.28137	6.08643	0.122247	0.0721	0.0018	984	13	981	18	982	53	982	53	0.0030581	0.0539715	186
260216_3A__83.FIN2	2.262	0.047	0.1991	0.0027	0.58578	5.0226	0.0681116	0.0818	0.0011	1198	14	1170	14	1243	29	1243	29	0.0239316	0.0233307	37.67
260216_3A__84.FIN2	1.626	0.025	0.1614	0.0021	0.21783	6.19579	0.0806143	0.0733	0.0013	979.9	9.7	964	12	1016	36	1016	36	0.0164938	0.0354331	84.6
260216_3A__84.FIN2	2.142	0.027	0.1963	0.0022	0.54906	5.09424	0.0570929	0.0794	0.001	1162	8.8	1155	12	1179	25	1179	25	0.00606061	0.0212044	39.02
260216_3A__85.FIN2	2.109	0.025	0.1931	0.0014	0.57154	5.17866	0.037546	0.07921	0.00076	1150.5	8.1	1137.9	7.6	1175	19	1175	19	0.011073	0.0161702	73.3
260216_3A__86.FIN2	2.061	0.031	0.1893	0.0017	0.68004	5.28262	0.0474403	0.07887	0.00088	1134	11	1117.2	9.2	1163	22	1163	22	0.0150376	0.0189166	276.3
260216_3A__87.FIN2	2.081	0.034	0.1931	0.0023	0.71303	5.17866	0.0616827	0.07813	0.00096	1140	12	1138	13	1146	24	1146	24	0.00175747	0.0209424	22.9
260216_3A__88.FIN2	2.173	0.038	0.1988	0.0026	0.5473	5.03018	0.0657871	0.0791	0.0012	1171	12	1169	14	1169	29	1169	29	0.00171086	0.0248075	124.4
260216_3A__89.FIN2	2.191	0.029	0.1979	0.0018	0.416	5.05306	0.0459601	0.08018	0.00099	1176.9	9.2	1163.7	9.5	1196	24	1196	24	0.0113431	0.0200669	120.5
260216_3A__9.FIN2	1.626	0.013	0.1641	0.0011	0.58712	6.09385	0.0408484	0.07171	0.00046	979.8	4.9	979.4	6.2	977	13	977	13	0.000408413	0.013306	67
260216_3A__90.FIN2	1.646	0.028	0.1648	0.002	0.45646	6.06796	0.0736403	0.0725	0.0012	987	11	983	11	998	33	998	33	0.00406918	0.0330661	46.5
260216_3A__90.FIN2	2.463	0.095	0.2081	0.0067	0.80078	4.80538	0.154714	0.085	0.0017	1258	27	1218	36	1311	37	1311	37	0.0328407	0.0282227	213.7
260216_3A__91.FIN2	2.195	0.034	0.1968	0.002	0.34797	5.0813	0.0516392	0.0809	0.0013	1178	11	1158	11	1211	31	1211	31	0.0172712	0.0255987	54.8
260216_3A__92.FIN2	2.1	0.033	0.194	0.0019	0.55134	5.15464	0.0504836	0.0785	0.0011	1147	11	1143	10	1150	28	1150	28	0.00349956	0.0243478	71.3
260216_3A__93.FIN2	2.186	0.032	0.1972	0.0022	0.74294	5.07099	0.056573	0.08024	0.00087	1175	10	1160	12	1197	22	1197	22	0.012931	0.0183793	92.8
260216_3A__94.FIN2	2.058	0.027	0.1863	0.0018	0.54431	5.36769	0.0518617	0.07994	0.00096	1133.5	9.2	1101	10	1189	23	1189	23	0.0295186	0.019344	40.5
260216_3A__95.FIN2	2.178	0.043	0.2021	0.0031	0.71787	4.94805	0.0758978	0.0782	0.0011	1170	14	1186	17	1145	27	1145	27	-0.0134907	0.0235808	46.1
260216_3A__96.FIN2	2.171	0.025	0.1966	0.0021	0.67658	5.08647	0.0543316	0.07975	0.00075	1170.7	8.2	1158	11	1186	19	1186	19	0.0109672	0.0160202	215.9
260216_3A__97.FIN2	2.172	0.026	0.1985	0.0018	0.51459	5.03778	0.0456827	0.07933	0.00082	1172.8	8	1167.2	9.6	1175	21	1175	21	0.00479781	0.0178723	96.9
260216_3A__98.FIN2	2.618	0.035	0.2226	0.0027	0.61693	4.49236	0.0544896	0.0851	0.001	1304.3	9.9	1295	14	1313	24	1313	24	0.00718147	0.0182788	105.4
260216_3A__99.FIN2	1.655	0.019	0.1662	0.0014	0.31691	6.01685	0.0506834	0.07224	0.00089	991.2	7.6	990.7	7.7	988	25	988	25	0.000504694	0.0253036	73.8

## Sheet: Tec1
Analysis	Ratio 207Pb/235U	Error2S	Ratio 206Pb/238U	Error2S	rho	Ratio 238U/206Pb	Error2S	Ratio 207Pb/206Pb	Error2S	207Pb/235Pb Age (Ma)	Error2S	206Pb/238U Age (Ma)	Error2S	207Pb/206Pb Age (Ma)	Error2S	Prefered Age	Unc 2S	% disc. (6/8-7/5)	% Error 6/8 2S	Th/U
Z3-18Apr16-3B - 109	0.173	0.016	0.02559	0.00077	0.023301	39.0778	1.17585	0.0508	0.005	0.23174	164	15	162.9	4.9	230	162.9	4.9	0.00675261	0.0300798	0.0300798
Z3-18Apr16-3B - 244	0.1775	0.009	0.0257	0.00046	0.26977	38.9105	0.696453	0.0511	0.0025	0.017192	167.1	7.3	163.6	2.9	250	163.6	2.9	0.0213936	0.0177262	0.0177262
Z4-18Apr16-3B - 5	0.267	0.019	0.038	0.0016	-0.12853	26.3158	1.10803	0.0532	0.0048	0.62886	244	17	240.6	10	310	240.6	10	0.0141313	0.0415628	0.0415628
Z3-18Apr16-3B - 44	0.287	0.021	0.0386	0.0021	0.63991	25.9067	1.40943	0.0533	0.0027	0.029223	255	17	244	13	380	244	13	0.045082	0.0532787	0.0532787
Z3-18Apr16-3B - 26	0.2839	0.0092	0.03864	0.00074	0.19333	25.8799	0.49563	0.0532	0.0015	0.30609	253.6	7.3	244.4	4.6	329	244.4	4.6	0.0376432	0.0188216	0.0188216
Z3-18Apr16-3B - 25	0.277	0.011	0.03876	0.00096	0.12919	25.7998	0.639004	0.0514	0.0022	0.35287	248.3	8.6	245.1	6	263	245.1	6	0.0130559	0.0244798	0.0244798
Z3-18Apr16-3B - 239	0.2883	0.01	0.03893	0.00092	0.5546	25.6871	0.607042	0.0529	0.0014	0.063127	257.1	7.9	246.2	5.7	335	246.2	5.7	0.0442729	0.0231519	0.0231519
Z4-18Apr16-3B - 44	0.295	0.012	0.03894	0.00091	0.45717	25.6805	0.600136	0.0541	0.0018	0.22175	262.4	9.2	246.3	5.6	377	246.3	5.6	0.0653674	0.0227365	0.0227365
Z3-18Apr16-3B - 24	0.2874	0.011	0.03947	0.00081	0.28146	25.3357	0.519937	0.0527	0.0018	0.14377	256.2	8.4	249.6	5	305	249.6	5	0.0264423	0.0200321	0.0200321
Z3-18Apr16-3B - 1	0.2871	0.0066	0.03951	0.00075	0.62785	25.31	0.480449	0.05265	0.001	-0.14084	256.2	5.2	249.8	4.6	335	249.8	4.6	0.0256205	0.0184147	0.0184147
Z3-18Apr16-3B - 68	0.2904	0.0095	0.04023	0.0008	0.3533	24.8571	0.494299	0.0526	0.0016	0.21573	258.7	7.5	254.3	4.9	302	254.3	4.9	0.0173024	0.0192686	0.0192686
Z3-18Apr16-3B - 97	0.2946	0.0097	0.04087	0.00094	0.21636	24.4678	0.562754	0.0517	0.0016	0.32856	262	7.6	258.2	5.8	294	258.2	5.8	0.0147173	0.0224632	0.0224632
Z3-18Apr16-3B - 195	0.306	0.011	0.04101	0.00098	0.48853	24.3843	0.582702	0.0544	0.0016	-0.034995	270.5	8.8	259.1	6.1	376	259.1	6.1	0.0439985	0.023543	0.023543
Z3-18Apr16-3B - 106	0.3	0.014	0.0413	0.00094	0.21892	24.2131	0.551097	0.052	0.0027	0.16026	266	11	260.9	5.8	270	260.9	5.8	0.0195477	0.0222307	0.0222307
Z3-18Apr16-3B - 27	0.303	0.0095	0.04135	0.00081	0.027078	24.1838	0.473733	0.0525	0.0018	0.39382	268.6	7.4	261.2	5	297	261.2	5	0.0283308	0.0191424	0.0191424
Z3-18Apr16-3B - 162	0.301	0.012	0.04138	0.00087	0.21319	24.1663	0.508087	0.0532	0.0017	0.14336	269.1	8.5	261.4	5.4	329	261.4	5.4	0.0294568	0.020658	0.020658
Z3-18Apr16-3B - 117	0.298	0.015	0.04138	0.00095	0.35214	24.1663	0.554808	0.0521	0.002	-0.0055316	266	11	261.4	5.9	325	261.4	5.9	0.0175976	0.0225708	0.0225708
Z3-18Apr16-3B - 156	0.296	0.02	0.0415	0.0016	0.55845	24.0964	0.929017	0.0538	0.0036	-0.15774	263	16	262.3	9.7	330	262.3	9.7	0.0026687	0.0369806	0.0369806
Z3-18Apr16-3B - 126	0.3	0.011	0.04158	0.0009	-0.060605	24.05	0.520563	0.0523	0.0024	0.47145	266.2	8.8	262.6	5.6	286	262.6	5.6	0.0137091	0.0213252	0.0213252
Z3-18Apr16-3B - 231	0.3	0.012	0.0418	0.0014	0.55277	23.9234	0.801264	0.0528	0.0019	0.15675	268.5	8.3	263.9	8.9	330	263.9	8.9	0.0174308	0.0337249	0.0337249
Z4-18Apr16-3B - 12	0.318	0.02	0.04181	0.00094	0.075784	23.9177	0.537734	0.0553	0.0033	0.23295	280	15	264	5.8	400	264	5.8	0.0606061	0.0219697	0.0219697
Z4-18Apr16-3B - 31	0.299	0.016	0.0419	0.0013	0.33287	23.8663	0.740483	0.0523	0.0029	0.25346	265	13	264.5	8.2	290	264.5	8.2	0.00189036	0.0310019	0.0310019
Z3-18Apr16-3B - 90	0.3058	0.011	0.04202	0.00089	0.18403	23.7982	0.504055	0.0532	0.0018	0.41086	272	8.1	265.3	5.5	323	265.3	5.5	0.0252544	0.0207312	0.0207312
Z4-18Apr16-3B - 37	0.303	0.012	0.0421	0.00098	0.29227	23.753	0.552919	0.0521	0.0017	0.1248	268.4	9.5	265.8	6.1	280	265.8	6.1	0.00978179	0.0229496	0.0229496
Z3-18Apr16-3B - 84	0.2997	0.0079	0.04216	0.00083	0.65489	23.7192	0.466957	0.05175	0.0011	-0.0969	266.1	6.2	266.2	5.1	277	266.2	5.1	-0.000375657	0.0191585	0.0191585
Z3-18Apr16-3B - 89	0.3033	0.0089	0.04226	0.00083	0.28376	23.663	0.46475	0.0527	0.0014	0.30125	269.9	6.7	266.8	5.2	307	266.8	5.2	0.0116192	0.0194903	0.0194903
Z3-18Apr16-3B - 167	0.299	0.014	0.04233	0.00089	0.082382	23.6239	0.496699	0.0522	0.0026	0.23416	265	11	267.2	5.5	270	267.2	5.5	-0.00823353	0.0205838	0.0205838
Z3-18Apr16-3B - 78	0.306	0.019	0.0424	0.00081	-0.23542	23.5849	0.450561	0.0529	0.0036	0.43325	271	14	267.7	5	300	267.7	5	0.0123272	0.0186776	0.0186776
Z3-18Apr16-3B - 210	0.319	0.018	0.0424	0.0012	0.10009	23.5849	0.667497	0.0542	0.0027	0.26207	281	14	267.8	7.7	360	267.8	7.7	0.0492905	0.0287528	0.0287528
Z4-18Apr16-3B - 3	0.3089	0.0091	0.04256	0.00071	0.43187	23.4962	0.391972	0.0527	0.0013	0.05698	273.2	7.1	268.7	4.4	310	268.7	4.4	0.0167473	0.0163751	0.0163751
Z3-18Apr16-3B - 200	0.3033	0.009	0.04266	0.00086	0.40254	23.4412	0.47256	0.0519	0.0016	0.15007	268.8	7	269.3	5.3	271	269.3	5.3	-0.00185667	0.0196807	0.0196807
Z3-18Apr16-3B - 144	0.3024	0.0067	0.0427	0.0008	0.20815	23.4192	0.438767	0.0513	0.001	0.431	268.2	5.2	269.5	5	249	269.5	5	-0.00482375	0.0185529	0.0185529
Z3-18Apr16-3B - 235	0.3132	0.011	0.04272	0.00084	0.21575	23.4082	0.460274	0.053	0.0017	0.27318	277.8	7.7	269.7	5.2	317	269.7	5.2	0.0300334	0.0192807	0.0192807
Z3-18Apr16-3B - 79	0.3125	0.0089	0.04274	0.00082	0.29132	23.3973	0.448895	0.053	0.0012	0.20048	277	6.6	269.8	5.1	333	269.8	5.1	0.0266864	0.0189029	0.0189029
Z3-18Apr16-3B - 209	0.332	0.014	0.04275	0.0009	0.40632	23.3918	0.492459	0.0553	0.0019	0.07617	292.8	9.8	269.8	5.6	426	269.8	5.6	0.0852483	0.0207561	0.0207561
Z3-18Apr16-3B - 253	0.307	0.011	0.04277	0.00089	0.35518	23.3809	0.486532	0.0518	0.0017	0.19409	271.9	8.8	269.9	5.5	268	269.9	5.5	0.00741015	0.0203779	0.0203779
Z3-18Apr16-3B - 134	0.307	0.02	0.04281	0.00097	0.040728	23.359	0.529275	0.0524	0.003	0.26189	271	15	270.2	6	280	270.2	6	0.00296077	0.0222058	0.0222058
Z3-18Apr16-3B - 242	0.3057	0.011	0.04282	0.00083	0.42314	23.3536	0.452673	0.0524	0.0015	0.055986	270.6	8.3	270.3	5.1	292	270.3	5.1	0.00110988	0.0188679	0.0188679
Z4-18Apr16-3B - 39	0.305	0.011	0.0429	0.00085	0.55619	23.31	0.461854	0.0508	0.0014	-0.044746	270	8.5	270.8	5.3	236	270.8	5.3	-0.00295421	0.0195716	0.0195716
Z4-18Apr16-3B - 33	0.3019	0.011	0.04296	0.00075	0.43207	23.2775	0.40638	0.0511	0.0016	-0.042283	268.9	8.1	271.1	4.6	236	271.1	4.6	-0.00811509	0.0169679	0.0169679
Z3-18Apr16-3B - 75	0.3111	0.0092	0.04307	0.00077	-0.0046222	23.218	0.415089	0.0528	0.0016	0.39893	276.4	7.7	271.8	4.8	312	271.8	4.8	0.0169242	0.01766	0.01766
Z4-18Apr16-3B - 40	0.313	0.013	0.04308	0.00096	0.21489	23.2126	0.517273	0.053	0.0023	0.15934	278	11	271.9	5.9	346	271.9	5.9	0.0224347	0.0216992	0.0216992
Z3-18Apr16-3B - 143	0.298	0.015	0.0431	0.00098	0.020124	23.2019	0.52756	0.0502	0.0027	0.30061	266	12	272	6.1	230	272	6.1	-0.0220588	0.0224265	0.0224265
Z4-18Apr16-3B - 28	0.313	0.014	0.0431	0.00092	0.27503	23.2019	0.49526	0.0537	0.0023	0.10407	276.4	10	272	5.7	341	272	5.7	0.0161765	0.0209559	0.0209559
Z3-18Apr16-3B - 247	0.312	0.011	0.04311	0.001	0.50116	23.1965	0.538076	0.0529	0.0012	-0.038093	275.6	8.7	272.1	6.3	323	272.1	6.3	0.0128629	0.0231533	0.0231533
Z3-18Apr16-3B - 250	0.305	0.014	0.04316	0.00089	0.091887	23.1696	0.477779	0.0512	0.0023	0.16931	270	11	272.4	5.5	240	272.4	5.5	-0.00881057	0.0201909	0.0201909
Z3-18Apr16-3B - 179	0.3082	0.01	0.04316	0.00089	0.15478	23.1696	0.477779	0.0514	0.0016	0.40001	272.7	7.9	272.4	5.5	251	272.4	5.5	0.00110132	0.0201909	0.0201909
Z3-18Apr16-3B - 199	0.315	0.017	0.04316	0.0011	0.53189	23.1696	0.590513	0.053	0.0025	-0.10012	277	13	272.4	6.5	330	272.4	6.5	0.0168869	0.023862	0.023862
Z3-18Apr16-3B - 66	0.312	0.011	0.0432	0.0011	0.55212	23.1481	0.58942	0.0519	0.0015	0.14405	275.5	8.6	272.6	6.9	272	272.6	6.9	0.0106383	0.0253118	0.0253118
Z3-18Apr16-3B - 80	0.317	0.011	0.04329	0.001	0.55221	23.1	0.533611	0.053	0.0016	0.011723	279.4	8.2	273.2	6.3	333	273.2	6.3	0.022694	0.02306	0.02306
Z3-18Apr16-3B - 214	0.328	0.015	0.04333	0.00086	0.060748	23.0787	0.458059	0.055	0.0026	0.31103	288	12	273.4	5.3	390	273.4	5.3	0.0534016	0.0193855	0.0193855
Z4-18Apr16-3B - 10	0.32	0.016	0.04338	0.00095	0.20541	23.0521	0.504829	0.053	0.0026	0.10326	281	13	273.7	5.8	310	273.7	5.8	0.0266715	0.0211911	0.0211911
Z3-18Apr16-3B - 5	0.315	0.011	0.04343	0.0011	0.607	23.0256	0.583194	0.0527	0.0014	-0.065774	278.1	8.5	274.1	6.7	310	274.1	6.7	0.0145932	0.0244436	0.0244436
Z3-18Apr16-3B - 163	0.3175	0.0095	0.04343	0.00079	0.45423	23.0256	0.418839	0.0521	0.0013	0.027415	279.8	7.3	274.1	4.9	282	274.1	4.9	0.0207953	0.0178767	0.0178767
Z3-18Apr16-3B - 158	0.319	0.012	0.04345	0.0011	0.48293	23.015	0.582657	0.0531	0.0017	0.16721	280.9	8.9	274.2	6.8	329	274.2	6.8	0.0244347	0.0247994	0.0247994
Z3-18Apr16-3B - 251	0.3073	0.0094	0.04347	0.00088	-0.23673	23.0044	0.465697	0.0511	0.0019	0.65458	271.9	7.4	274.3	5.4	238	274.3	5.4	-0.00874954	0.0196865	0.0196865
Z3-18Apr16-3B - 184	0.31	0.011	0.04347	0.00085	0.066269	23.0044	0.449821	0.0513	0.0018	0.32172	273.7	8.6	274.3	5.2	247	274.3	5.2	-0.00218739	0.0189573	0.0189573
Z3-18Apr16-3B - 94	0.3123	0.0088	0.04348	0.00092	0.01234	22.9991	0.486641	0.0524	0.0016	0.52047	275.8	6.8	274.4	5.7	305	274.4	5.7	0.00510204	0.0207726	0.0207726
Z3-18Apr16-3B - 33	0.312	0.017	0.04351	0.00085	0.15878	22.9832	0.448994	0.0524	0.0027	0.12768	275	13	274.6	5.3	290	274.6	5.3	0.00145666	0.0193008	0.0193008
Z3-18Apr16-3B - 194	0.32	0.013	0.04355	0.0011	0.15658	22.9621	0.579984	0.0535	0.0022	0.33445	281.8	10	274.8	6.5	335	274.8	6.5	0.0254731	0.0236536	0.0236536
Z3-18Apr16-3B - 86	0.315	0.03	0.04355	0.00082	0.76935	22.9621	0.432352	0.0525	0.0049	-0.66746	277	22	274.8	5	260	274.8	5	0.00800582	0.0181951	0.0181951
Z3-18Apr16-3B - 155	0.311	0.014	0.04356	0.00091	0.1041	22.9568	0.479585	0.0513	0.0023	0.27852	276	11	274.8	5.6	241	274.8	5.6	0.00436681	0.0203785	0.0203785
Z4-18Apr16-3B - 32	0.32	0.012	0.04359	0.00082	0.26538	22.941	0.431559	0.0527	0.0019	0.067904	281.9	9.1	275	5.1	305	275	5.1	0.0250909	0.0185455	0.0185455
Z3-18Apr16-3B - 115	0.3121	0.0083	0.04361	0.00084	0.8865	22.9305	0.441679	0.05184	0.0011	-0.052255	275.7	6.4	275.1	5.2	273	275.1	5.2	0.00218103	0.0189022	0.0189022
Z3-18Apr16-3B - 217	0.32	0.013	0.04369	0.00092	0.41445	22.8885	0.481974	0.053	0.0021	-0.047058	281.9	10	275.6	5.7	320	275.6	5.7	0.0228592	0.0206821	0.0206821
Z3-18Apr16-3B - 114	0.32	0.013	0.04379	0.00094	0.50838	22.8363	0.490205	0.0536	0.002	-0.1821	281.7	9.7	276.3	5.8	340	276.3	5.8	0.019544	0.0209917	0.0209917
Z3-18Apr16-3B - 248	0.3214	0.0099	0.04385	0.00094	0.15078	22.805	0.488865	0.0535	0.0014	0.37554	282.8	7.6	276.6	5.8	341	276.6	5.8	0.022415	0.0209689	0.0209689
Z3-18Apr16-3B - 192	0.3104	0.0095	0.04391	0.001	0.41192	22.7739	0.518648	0.0511	0.0015	0.21994	274.3	7.4	277	6.3	248	277	6.3	-0.00974729	0.0227437	0.0227437
Z3-18Apr16-3B - 123	0.3203	0.0087	0.0439	0.0011	0.37179	22.779	0.570773	0.0528	0.0012	0.45642	282	6.7	277	7	316	277	7	0.0180505	0.0252708	0.0252708
Z3-18Apr16-3B - 119	0.3181	0.0096	0.04392	0.00084	0.4453	22.7687	0.435466	0.0523	0.0014	-0.013383	280.2	7.4	277	5.2	291	277	5.2	0.0115523	0.0187726	0.0187726
Z3-18Apr16-3B - 61	0.318	0.028	0.0439	0.0012	0.2446	22.779	0.622662	0.0532	0.0045	0.091955	280	21	277.2	7.3	320	277.2	7.3	0.010101	0.0263348	0.0263348
Z3-18Apr16-3B - 74	0.3097	0.0086	0.04398	0.00087	0.36914	22.7376	0.449789	0.0512	0.0013	0.18193	273.8	6.6	277.5	5.4	243	277.5	5.4	-0.0133333	0.0194595	0.0194595
Z3-18Apr16-3B - 148	0.314	0.016	0.04401	0.00098	0.52586	22.7221	0.505968	0.0517	0.0022	-0.188	277	13	277.6	6	273	277.6	6	-0.00216138	0.0216138	0.0216138
Z3-18Apr16-3B - 49	0.3151	0.0086	0.04403	0.00081	0.13016	22.7118	0.417818	0.052	0.0014	0.32644	278	6.7	277.8	5	277	277.8	5	0.000719942	0.0179986	0.0179986
Z3-18Apr16-3B - 129	0.317	0.0073	0.04404	0.00072	0.080589	22.7066	0.371226	0.05195	0.00094	0.41235	279.5	5.6	277.8	4.4	287	277.8	4.4	0.00611951	0.0158387	0.0158387
Z3-18Apr16-3B - 31	0.327	0.012	0.04412	0.00082	0.31613	22.6655	0.421253	0.0534	0.0017	0.18373	287.3	8.8	278.3	5.1	346	278.3	5.1	0.0323392	0.0183255	0.0183255
Z3-18Apr16-3B - 249	0.3234	0.0094	0.04418	0.00099	0.44958	22.6347	0.507205	0.0532	0.0014	0.14276	284.3	7.2	278.7	6.1	329	278.7	6.1	0.0200933	0.0218873	0.0218873
Z3-18Apr16-3B - 168	0.3171	0.0084	0.04424	0.00081	0.54877	22.604	0.413861	0.052	0.0011	-0.043044	279.6	6.5	279	5	282	279	5	0.00215054	0.0179211	0.0179211
Z3-18Apr16-3B - 221	0.312	0.014	0.04425	0.00091	0.18982	22.5989	0.464745	0.0508	0.0022	0.16469	275	11	279.1	5.6	252	279.1	5.6	-0.0146901	0.0200645	0.0200645
Z3-18Apr16-3B - 29	0.325	0.02	0.0443	0.001	0.51208	22.5734	0.509557	0.0537	0.0028	0.080625	287	16	279.4	6.2	340	279.4	6.2	0.0272011	0.0221904	0.0221904
Z3-18Apr16-3B - 234	0.321	0.015	0.0443	0.00085	0.26945	22.5734	0.433123	0.0522	0.0023	0.056647	282	11	279.4	5.2	279	279.4	5.2	0.00930565	0.0186113	0.0186113
Z3-18Apr16-3B - 153	0.3227	0.0093	0.04432	0.001	0.2557	22.5632	0.509097	0.0532	0.0014	0.30403	283.8	7.1	279.5	6.3	344	279.5	6.3	0.0153846	0.0225403	0.0225403
Z3-18Apr16-3B - 105	0.318	0.012	0.04433	0.001	0.22147	22.5581	0.508867	0.0527	0.0019	0.28581	279.8	9.4	279.6	6.2	302	279.6	6.2	0.000715308	0.0221745	0.0221745
Z4-18Apr16-3B - 43	0.325	0.019	0.04436	0.00089	0.3119	22.5428	0.45228	0.053	0.0027	-0.04505	285	14	279.8	5.5	310	279.8	5.5	0.0185847	0.0196569	0.0196569
Z3-18Apr16-3B - 125	0.321	0.013	0.04436	0.0009	0.1604	22.5428	0.457361	0.0522	0.0021	0.30838	282.5	9.9	279.8	5.5	278	279.8	5.5	0.00964975	0.0196569	0.0196569
Z3-18Apr16-3B - 219	0.33	0.027	0.04437	0.00089	0.1554	22.5378	0.452076	0.0543	0.0045	-0.012195	288	20	279.9	5.5	340	279.9	5.5	0.0289389	0.0196499	0.0196499
Z4-18Apr16-3B - 18	0.316	0.014	0.0444	0.001	0.10655	22.5225	0.507264	0.0514	0.0022	0.30101	279	11	280	6.4	260	280	6.4	-0.00357143	0.0228571	0.0228571
Z3-18Apr16-3B - 227	0.3134	0.0078	0.04439	0.00084	0.39944	22.5276	0.426294	0.05201	0.0011	0.18761	276.7	6	280	5.2	281	280	5.2	-0.0117857	0.0185714	0.0185714
Z3-18Apr16-3B - 70	0.327	0.014	0.04442	0.00094	0.43513	22.5124	0.476399	0.0533	0.0019	-0.0062454	286.9	10	280.1	5.8	327	280.1	5.8	0.024277	0.0207069	0.0207069
Z3-18Apr16-3B - 120	0.329	0.013	0.04441	0.00091	0.16539	22.5175	0.461402	0.0534	0.0021	0.23202	288.5	9.7	280.1	5.6	331	280.1	5.6	0.0299893	0.0199929	0.0199929
Z3-18Apr16-3B - 215	0.33	0.016	0.04445	0.001	0.20528	22.4972	0.506123	0.0531	0.0026	0.16565	289	12	280.3	6.2	320	280.3	6.2	0.0310382	0.0221192	0.0221192
Z3-18Apr16-3B - 82	0.318	0.013	0.04446	0.00098	0.54673	22.4921	0.495778	0.0524	0.0015	-0.19923	280.2	9.7	280.4	6	293	280.4	6	-0.000713267	0.021398	0.021398
Z3-18Apr16-3B - 135	0.326	0.013	0.04446	0.0011	0.44089	22.4921	0.556485	0.0529	0.0017	-0.030391	286.3	10	280.4	6.8	312	280.4	6.8	0.0210414	0.0242511	0.0242511
Z3-18Apr16-3B - 216	0.331	0.018	0.0445	0.0014	0.31232	22.4719	0.706981	0.0529	0.0031	0.19167	290	14	280.7	8.8	310	280.7	8.8	0.0331315	0.0313502	0.0313502
Z4-18Apr16-3B - 34	0.315	0.015	0.04453	0.001	0.17821	22.4568	0.504307	0.0514	0.0025	0.24118	278	12	280.8	6.3	243	280.8	6.3	-0.00997151	0.0224359	0.0224359
Z4-18Apr16-3B - 42	0.3133	0.0083	0.04455	0.00082	0.25899	22.4467	0.41316	0.0512	0.0012	0.25824	276.6	6.4	281	5.1	244	281	5.1	-0.0156584	0.0181495	0.0181495
Z3-18Apr16-3B - 213	0.33	0.014	0.04459	0.001	0.53427	22.4266	0.50295	0.0538	0.002	-0.034029	290	11	281.2	6.2	354	281.2	6.2	0.0312945	0.0220484	0.0220484
Z3-18Apr16-3B - 245	0.327	0.014	0.04462	0.001	0.28432	22.4115	0.502274	0.0527	0.002	0.16167	286.6	10	281.4	6.4	316	281.4	6.4	0.018479	0.0227434	0.0227434
Z3-18Apr16-3B - 76	0.3251	0.011	0.04465	0.00095	0.39878	22.3964	0.47652	0.0529	0.0015	0.20323	285.7	8.1	281.6	5.8	317	281.6	5.8	0.0145597	0.0205966	0.0205966
Z3-18Apr16-3B - 87	0.3287	0.0084	0.04471	0.00089	0.27883	22.3664	0.445226	0.0532	0.0015	0.26692	288.5	6.4	281.9	5.5	339	281.9	5.5	0.0234126	0.0195105	0.0195105
Z4-18Apr16-3B - 58	0.327	0.011	0.04471	0.00086	0.29007	22.3664	0.430219	0.053	0.0016	0.080884	287.4	8.7	282	5.3	318	282	5.3	0.0191489	0.0187943	0.0187943
Z3-18Apr16-3B - 252	0.318	0.013	0.04475	0.00088	0.22206	22.3464	0.439437	0.0521	0.0021	0.15717	280	9.8	282.2	5.4	275	282.2	5.4	-0.00779589	0.0191354	0.0191354
Z3-18Apr16-3B - 180	0.316	0.011	0.04475	0.00082	0.47684	22.3464	0.409475	0.052	0.0014	-0.061561	278.5	8.3	282.2	5	276	282.2	5	-0.0131113	0.0177179	0.0177179
Z3-18Apr16-3B - 92	0.32	0.014	0.04477	0.00087	0.22848	22.3364	0.434055	0.0514	0.002	0.079358	281.2	10	282.3	5.4	249	282.3	5.4	-0.00389656	0.0191286	0.0191286
Z3-18Apr16-3B - 141	0.323	0.015	0.04478	0.00084	0.58061	22.3314	0.418901	0.052	0.0015	-0.28592	284	11	282.4	5.2	301	282.4	5.2	0.00566572	0.0184136	0.0184136
Z4-18Apr16-3B - 13	0.322	0.018	0.0448	0.0012	-0.1215	22.3214	0.597895	0.0519	0.0035	0.45696	283	14	282.5	7.6	280	282.5	7.6	0.00176991	0.0269027	0.0269027
Z3-18Apr16-3B - 133	0.3263	0.011	0.04483	0.0011	0.39999	22.3065	0.547338	0.0525	0.0017	0.31183	286.5	8.2	282.7	6.6	310	282.7	6.6	0.0134418	0.0233463	0.0233463
Z3-18Apr16-3B - 212	0.312	0.014	0.04484	0.0011	0.021926	22.3015	0.547093	0.0503	0.0026	0.42043	277	11	282.7	6.5	200	282.7	6.5	-0.0201627	0.0229926	0.0229926
Z3-18Apr16-3B - 193	0.321	0.013	0.04483	0.00082	-0.18041	22.3065	0.408015	0.0523	0.0021	0.4667	282.1	10	282.7	5.1	290	282.7	5.1	-0.00212239	0.0180403	0.0180403
Z3-18Apr16-3B - 223	0.3272	0.0089	0.045	0.00088	0.28273	22.2222	0.434568	0.0523	0.0011	0.33516	287.3	6.8	283.8	5.4	294	283.8	5.4	0.0123326	0.0190275	0.0190275
Z3-18Apr16-3B - 206	0.322	0.011	0.04505	0.0011	0.40937	22.1976	0.542005	0.0522	0.0018	0.2273	283.3	8.5	284	7.1	293	284	7.1	-0.00246479	0.025	0.025
Z3-18Apr16-3B - 38	0.3244	0.011	0.04515	0.00098	0.38049	22.1484	0.48074	0.0516	0.0014	0.08853	285.1	8.1	284.7	6	260	284.7	6	0.00140499	0.0210748	0.0210748
Z3-18Apr16-3B - 56	0.3276	0.0085	0.0452	0.00079	-0.1416	22.1239	0.386679	0.0525	0.0013	0.50569	287.6	6.5	284.9	4.9	301	284.9	4.9	0.00947701	0.017199	0.017199
Z3-18Apr16-3B - 137	0.3304	0.01	0.04524	0.0012	0.36429	22.1043	0.586322	0.0531	0.0016	0.3661	289.7	7.9	285.2	7.2	322	285.2	7.2	0.0157784	0.0252454	0.0252454
Z3-18Apr16-3B - 261	0.3254	0.0076	0.0453	0.00082	0.48045	22.0751	0.399593	0.05181	0.00095	0.18144	286	5.8	285.6	5	273	285.6	5	0.00140056	0.017507	0.017507
Z3-18Apr16-3B - 204	0.3229	0.01	0.0454	0.00098	0.52239	22.0264	0.47546	0.0517	0.0015	0.024155	285.3	8.5	286.2	6	277	286.2	6	-0.00314465	0.0209644	0.0209644
Z3-18Apr16-3B - 142	0.332	0.013	0.04526	0.0011	0.44932	22.0946	0.536987	0.0532	0.0019	0.075114	292.6	9.7	286.5	6.5	324	286.5	6.5	0.0212914	0.0226876	0.0226876
Z3-18Apr16-3B - 198	0.332	0.013	0.04546	0.00099	0.37345	21.9974	0.479045	0.0529	0.0019	-0.039594	291	10	286.6	6.1	310	286.6	6.1	0.0153524	0.021284	0.021284
Z4-18Apr16-3B - 57	0.3324	0.01	0.0455	0.00089	0.57873	21.978	0.4299	0.0532	0.0012	0.029147	291.2	7.6	286.8	5.5	341	286.8	5.5	0.0153417	0.0191771	0.0191771
Z3-18Apr16-3B - 116	0.339	0.013	0.04551	0.00084	-0.038065	21.9732	0.40557	0.0534	0.0019	0.3292	296.3	9.9	286.9	5.2	330	286.9	5.2	0.032764	0.0181248	0.0181248
Z3-18Apr16-3B - 43	0.3342	0.0075	0.04558	0.00081	0.23922	21.9394	0.389885	0.05323	0.001	0.32102	293.5	5.9	287.3	5	342	287.3	5	0.0215802	0.0174034	0.0174034
Z3-18Apr16-3B - 131	0.336	0.0098	0.0457	0.001	0.32066	21.8818	0.478815	0.0536	0.0014	0.39728	293.9	7.4	288	6.1	346	288	6.1	0.0204861	0.0211806	0.0211806
Z3-18Apr16-3B - 19	0.34	0.013	0.0457	0.0013	0.59642	21.8818	0.622459	0.0539	0.0016	0.066024	297.2	9.6	288.1	7.8	357	288.1	7.8	0.0315863	0.0270739	0.0270739
Z3-18Apr16-3B - 130	0.3369	0.011	0.04592	0.0008	0.24235	21.777	0.37939	0.0526	0.0014	0.097275	296.7	7.2	289.4	4.9	328	289.4	4.9	0.0252246	0.0169316	0.0169316
Z3-18Apr16-3B - 257	0.34	0.012	0.04602	0.0011	0.21861	21.7297	0.519397	0.0544	0.0022	0.21846	297	8.8	290	6.8	374	290	6.8	0.0241379	0.0234483	0.0234483
Z3-18Apr16-3B - 17	0.338	0.013	0.0461	0.0015	0.3257	21.692	0.705813	0.0524	0.0019	0.51853	295.5	9.8	290.4	9.2	309	290.4	9.2	0.017562	0.0316804	0.0316804
Z3-18Apr16-3B - 39	0.328	0.014	0.0461	0.0012	0.10166	21.692	0.56465	0.0511	0.0022	0.40192	287.5	11	290.5	7.3	236	290.5	7.3	-0.010327	0.0251291	0.0251291
Z3-18Apr16-3B - 59	0.325	0.013	0.04609	0.001	-0.083738	21.6967	0.470746	0.0511	0.0023	0.47962	285.2	10	290.5	6.4	236	290.5	6.4	-0.0182444	0.022031	0.022031
Z3-18Apr16-3B - 11	0.3409	0.011	0.04609	0.00092	0.36848	21.6967	0.433086	0.0539	0.0015	0.14687	297.6	8.2	290.5	5.7	373	290.5	5.7	0.0244406	0.0196213	0.0196213
Z3-18Apr16-3B - 37	0.328	0.014	0.0461	0.0013	0.3608	21.692	0.611704	0.0514	0.0018	0.20132	287	11	290.6	8	268	290.6	8	-0.0123882	0.0275292	0.0275292
Z3-18Apr16-3B - 160	0.335	0.016	0.04614	0.0011	0.30204	21.6732	0.516699	0.0519	0.0022	0.080005	293	12	290.8	6.8	267	290.8	6.8	0.00756534	0.0233838	0.0233838
Z3-18Apr16-3B - 259	0.338	0.012	0.04635	0.0011	0.42184	21.575	0.512027	0.0537	0.0015	0.18086	295.5	9.3	292	6.6	350	292	6.6	0.0119863	0.0226027	0.0226027
Z3-18Apr16-3B - 85	0.3418	0.0086	0.04645	0.0011	0.59017	21.5285	0.509825	0.0534	0.0011	0.28318	298.4	6.5	292.7	6.5	339	292.7	6.5	0.0194739	0.022207	0.022207
Z3-18Apr16-3B - 157	0.3423	0.0074	0.04657	0.00082	0.19301	21.4731	0.378095	0.0537	0.0012	0.38818	298.8	5.6	293.4	5	353	293.4	5	0.0184049	0.0170416	0.0170416
Z3-18Apr16-3B - 65	0.348	0.017	0.04678	0.0012	-0.12725	21.3767	0.548354	0.054	0.0028	0.44346	303	13	294.7	7.3	390	294.7	7.3	0.0281642	0.024771	0.024771
Z3-18Apr16-3B - 233	0.3353	0.0084	0.0468	0.001	0.70942	21.3675	0.456571	0.05177	0.00086	0.20735	293.5	6.4	294.8	6.2	272	294.8	6.2	-0.00440977	0.0210312	0.0210312
Z3-18Apr16-3B - 170	0.3447	0.01	0.04699	0.0011	0.43467	21.2811	0.498175	0.0523	0.0012	0.20591	300.6	7.8	296	6.6	297	296	6.6	0.0155405	0.0222973	0.0222973
Z3-18Apr16-3B - 28	0.339	0.013	0.04708	0.00098	0.1582	21.2404	0.442133	0.0521	0.002	0.24413	296	9.8	296.6	6	274	296.6	6	-0.00202293	0.0202293	0.0202293
Z3-18Apr16-3B - 136	0.34	0.01	0.04725	0.0011	0.67335	21.164	0.492707	0.05156	0.001	0.1927	297	7.7	297.6	6.8	262	297.6	6.8	-0.00201613	0.0228495	0.0228495
Z3-18Apr16-3B - 241	0.336	0.017	0.0475	0.0013	0.33044	21.0526	0.576177	0.0517	0.0027	0.16513	296	14	299.2	8.1	250	299.2	8.1	-0.0106952	0.0270722	0.0270722
Z4-18Apr16-3B - 56	0.3502	0.0088	0.04762	0.0011	0.072779	20.9996	0.485081	0.0538	0.0013	0.49075	306.2	7.3	299.9	6.6	360	299.9	6.6	0.021007	0.0220073	0.0220073
Z4-18Apr16-3B - 65	0.342	0.011	0.0479	0.001	0.2674	20.8768	0.435842	0.0517	0.0015	0.33275	299.7	8	301.6	6.2	273	301.6	6.2	-0.00629973	0.020557	0.020557
Z3-18Apr16-3B - 224	0.3459	0.0066	0.04791	0.00087	0.44193	20.8725	0.379024	0.05249	0.00079	0.42333	301.6	5	301.7	5.3	305	301.7	5.3	-0.000331455	0.0175671	0.0175671
Z3-18Apr16-3B - 95	0.355	0.011	0.04837	0.00095	0.65848	20.674	0.406042	0.0533	0.0012	-0.12822	308.1	8.5	304.5	5.9	334	304.5	5.9	0.0118227	0.019376	0.019376
Z3-18Apr16-3B - 208	0.3599	0.0086	0.04941	0.00086	0.24271	20.2388	0.352264	0.0528	0.0012	0.4144	313	6.1	310.9	5.3	332	310.9	5.3	0.00675458	0.0170473	0.0170473
Z3-18Apr16-3B - 145	0.368	0.015	0.0496	0.0014	0.12094	20.1613	0.569069	0.0546	0.0025	0.38619	320	12	312.2	8.6	376	312.2	8.6	0.024984	0.0275464	0.0275464
Z3-18Apr16-3B - 238	0.361	0.012	0.04964	0.00092	0.40869	20.145	0.373357	0.0529	0.0015	0.0010352	314.1	8.3	312.3	5.6	315	312.3	5.6	0.00576369	0.0179315	0.0179315
Z4-18Apr16-3B - 64	0.399	0.038	0.0498	0.0019	0.076929	20.0803	0.766117	0.0569	0.0055	0.29153	344	26	313	12	540	313	12	0.0990415	0.0383387	0.0383387
Z3-18Apr16-3B - 243	0.359	0.013	0.05072	0.0011	0.35967	19.7161	0.427597	0.0513	0.0016	0.076588	311.1	9.8	318.9	6.9	247	318.9	6.9	-0.0244591	0.0216369	0.0216369
Z3-18Apr16-3B - 149	0.712	0.046	0.0899	0.002	0.02456	11.1235	0.247463	0.0582	0.004	0.22191	543	28	554.8	12	510	554.8	12	-0.0212689	0.0216294	0.0216294
Z3-18Apr16-3B - 169	0.876	0.029	0.104	0.0025	0.42482	9.61538	0.231139	0.0616	0.0019	0.1929	638	16	638	15	654	638	15	0	0.023511	0.023511
Z3-18Apr16-3B - 172	1.123	0.037	0.1257	0.0043	0.65894	7.95545	0.272143	0.0651	0.0017	0.3268	764	17	763	25	774	763	25	0.00131062	0.0327654	0.0327654
Z3-18Apr16-3B - 177	1.333	0.04	0.1407	0.0028	0.21046	7.10732	0.141439	0.069	0.0021	0.29215	859	17	849	16	888	888	63	0.0117786	0.0709459	0.0709459
Z3-18Apr16-3B - 72	1.571	0.035	0.1612	0.0027	0.36967	6.20347	0.103904	0.0701	0.0013	0.17158	958	14	963.6	15	943	943	38	-0.00581154	0.0402969	0.0402969
Z3-18Apr16-3B - 146	1.584	0.033	0.1624	0.0026	-0.064497	6.15764	0.0985828	0.0709	0.0013	0.6029	963.4	13	969.9	14	958	958	34	-0.00670172	0.0354906	0.0354906
Z3-18Apr16-3B - 18	1.605	0.049	0.1619	0.0039	0.76395	6.17665	0.148789	0.0713	0.0016	0.085833	971	19	967	22	960	960	46	0.0041365	0.0479167	0.0479167
Z3-18Apr16-3B - 255	1.538	0.035	0.1574	0.0026	0.4376	6.35324	0.104946	0.0712	0.0013	0.090685	947	14	942.4	14	960	960	38	0.00488115	0.0395833	0.0395833
Z3-18Apr16-3B - 104	1.436	0.041	0.1457	0.0035	0.67292	6.86342	0.164873	0.0713	0.0015	0.13632	903	17	877	20	961	961	43	0.0296465	0.0447451	0.0447451
Z4-18Apr16-3B - 29	1.628	0.052	0.1646	0.0035	0.23847	6.07533	0.129184	0.0714	0.0023	0.24731	983	21	982	19	967	967	66	0.00101833	0.0682523	0.0682523
Z3-18Apr16-3B - 164	1.592	0.052	0.1605	0.0029	0.26361	6.23053	0.112577	0.0713	0.0021	0.13686	966	20	960	16	968	968	62	0.00625	0.0640496	0.0640496
Z3-18Apr16-3B - 222	1.582	0.046	0.1596	0.0032	0.34783	6.26566	0.125627	0.0717	0.0019	0.24453	962	18	954	18	970	970	53	0.00838574	0.0546392	0.0546392
Z3-18Apr16-3B - 176	1.609	0.041	0.1664	0.0042	0.16273	6.00962	0.151685	0.0716	0.0018	0.50959	973	16	992	23	970	970	52	-0.0191532	0.0536082	0.0536082
Z3-18Apr16-3B - 41	1.642	0.042	0.1664	0.0033	0.41235	6.00962	0.119181	0.0717	0.0016	0.20934	986	16	992	18	971	971	47	-0.00604839	0.0484037	0.0484037
Z4-18Apr16-3B - 27	1.566	0.034	0.1592	0.0032	0.60204	6.28141	0.126259	0.0714	0.0012	0.39706	956	14	952	18	972	972	33	0.00420168	0.0339506	0.0339506
Z3-18Apr16-3B - 113	1.596	0.032	0.1614	0.0028	0.40889	6.19579	0.107486	0.0717	0.0012	0.44313	968.3	13	964.4	15	974	974	34	0.00404397	0.0349076	0.0349076
Z4-18Apr16-3B - 35	1.562	0.036	0.1591	0.0029	0.4717	6.28536	0.114566	0.0714	0.0013	0.0077573	957	13	952	16	974	974	34	0.0052521	0.0349076	0.0349076
Z3-18Apr16-3B - 229	1.63	0.042	0.1645	0.0041	0.85746	6.07903	0.151514	0.07168	0.00095	0.186	981	16	982	23	976	976	27	-0.00101833	0.0276639	0.0276639
Z3-18Apr16-3B - 23	1.558	0.033	0.1576	0.0031	0.70969	6.34518	0.12481	0.07179	0.001	0.29031	955	14	943	17	978	978	30	0.0127253	0.0306748	0.0306748
Z4-18Apr16-3B - 49	1.657	0.029	0.1675	0.0029	0.57997	5.97015	0.103364	0.07179	0.00094	0.45814	992.1	11	998.3	16	979	979	27	-0.00621056	0.0275792	0.0275792
Z4-18Apr16-3B - 4	1.604	0.034	0.1626	0.0033	0.83065	6.15006	0.124817	0.0718	0.0009	0.02015	971	13	971	18	979	979	25	0	0.0255363	0.0255363
Z3-18Apr16-3B - 73	1.605	0.033	0.1603	0.003	0.58262	6.2383	0.116749	0.07189	0.0011	0.30444	971.8	13	958	17	981	981	31	0.014405	0.0316004	0.0316004
Z4-18Apr16-3B - 63	1.603	0.028	0.1622	0.0027	0.6386	6.16523	0.102627	0.0719	0.00082	0.3161	971.2	11	968.8	15	982	982	23	0.00247729	0.0234216	0.0234216
Z3-18Apr16-3B - 48	1.639	0.04	0.1652	0.0029	0.51893	6.05327	0.106262	0.0721	0.0014	0.024661	985	15	985.6	16	984	984	39	-0.000608766	0.0396341	0.0396341
Z3-18Apr16-3B - 236	1.547	0.04	0.156	0.0038	0.46795	6.41026	0.156147	0.072	0.0016	0.34592	949	16	934	21	984	984	44	0.01606	0.0447154	0.0447154
Z3-18Apr16-3B - 40	1.574	0.034	0.1588	0.0031	0.55602	6.29723	0.122931	0.072	0.0012	0.23116	959	14	950	17	984	984	34	0.00947368	0.0345528	0.0345528
Z4-18Apr16-3B - 7	1.601	0.049	0.163	0.0032	0.68193	6.13497	0.120441	0.0716	0.0018	-0.28318	969	19	973	18	984	984	51	-0.004111	0.0518293	0.0518293
Z4-18Apr16-3B - 21	1.649	0.032	0.1651	0.0032	0.31795	6.05694	0.117397	0.0721	0.0013	0.63138	988.9	12	985	17	986	986	35	0.00395939	0.035497	0.035497
Z3-18Apr16-3B - 205	1.58	0.04	0.1592	0.0031	0.24336	6.28141	0.122314	0.0719	0.0019	0.38455	962	16	953	17	987	987	52	0.00944386	0.0526849	0.0526849
Z3-18Apr16-3B - 6	1.611	0.035	0.163	0.0033	0.79024	6.13497	0.124205	0.07197	0.00094	0.35129	974	14	973	19	988	988	28	0.00102775	0.0283401	0.0283401
Z4-18Apr16-3B - 25	1.663	0.035	0.1682	0.0029	0.57547	5.9453	0.102505	0.07202	0.0012	0.18583	994.2	13	1002	16	989	989	32	-0.00778443	0.0323559	0.0323559
Z3-18Apr16-3B - 190	1.702	0.049	0.1712	0.005	0.35146	5.84112	0.170594	0.0723	0.0022	0.54774	1009	19	1018	28	989	989	62	-0.00884086	0.0626896	0.0626896
Z4-18Apr16-3B - 55	1.683	0.032	0.1673	0.0028	0.40192	5.97729	0.100038	0.07223	0.0011	0.49094	1001.8	12	997.3	16	990	990	31	0.00451218	0.0313131	0.0313131
Z3-18Apr16-3B - 2	1.587	0.074	0.1569	0.0046	0.63129	6.37349	0.186858	0.072	0.0024	-0.009003	963	29	939	26	995	995	73	0.0255591	0.0733668	0.0733668
Z4-18Apr16-3B - 16	1.662	0.035	0.1669	0.003	0.4648	5.99161	0.107698	0.0723	0.0013	0.31524	994	14	995	16	996	996	36	-0.00100503	0.0361446	0.0361446
Z3-18Apr16-3B - 32	1.597	0.042	0.1594	0.0034	0.73094	6.27353	0.133814	0.0725	0.0012	0.033747	968	16	953	19	998	998	34	0.0157398	0.0340681	0.0340681
Z4-18Apr16-3B - 47	1.679	0.046	0.1689	0.004	0.24191	5.92066	0.140217	0.0726	0.0022	0.61424	1000	17	1006	22	998	998	64	-0.00596421	0.0641283	0.0641283
Z3-18Apr16-3B - 3	1.645	0.059	0.1643	0.0058	0.92167	6.08643	0.214859	0.07251	0.00096	0.35387	986	22	980	32	999	999	27	0.00612245	0.027027	0.027027
Z4-18Apr16-3B - 54	1.682	0.034	0.1685	0.0029	0.61006	5.93472	0.102141	0.0724	0.0011	0.18757	1003.4	14	1003.9	16	1000	1000	32	-0.000498058	0.032	0.032
Z3-18Apr16-3B - 197	1.65	0.03	0.1647	0.0032	0.77707	6.07165	0.117968	0.07257	0.00088	0.58292	989.5	12	983	18	1001	1001	25	0.00661241	0.024975	0.024975
Z3-18Apr16-3B - 154	1.729	0.058	0.1708	0.0035	0.36181	5.8548	0.119975	0.0728	0.0022	0.36847	1018	22	1017	19	1001	1001	61	0.000983284	0.0609391	0.0609391
Z4-18Apr16-3B - 26	1.694	0.055	0.168	0.0035	0.62137	5.95238	0.124008	0.0728	0.0018	-0.042839	1005	21	1001	19	1001	1001	52	0.003996	0.0519481	0.0519481
Z3-18Apr16-3B - 10	1.55	0.039	0.153	0.0034	0.33469	6.53595	0.145243	0.0727	0.0019	0.35921	950	16	918	19	1002	1002	52	0.0348584	0.0518962	0.0518962
Z4-18Apr16-3B - 53	1.671	0.036	0.1666	0.003	0.63855	6.0024	0.108086	0.07276	0.0012	0.18691	997	13	993	17	1005	1005	33	0.0040282	0.0328358	0.0328358
Z3-18Apr16-3B - 175	1.598	0.045	0.1593	0.0028	0.52954	6.27746	0.110338	0.0728	0.0014	-0.11478	969	17	953	16	1006	1006	40	0.0167891	0.0397614	0.0397614
Z3-18Apr16-3B - 127	1.612	0.079	0.1601	0.0066	0.78972	6.2461	0.257491	0.0729	0.0022	0.010604	973	31	957	37	1007	1007	61	0.0167189	0.060576	0.060576
Z3-18Apr16-3B - 147	1.645	0.034	0.1642	0.0028	0.58179	6.09013	0.103851	0.07282	0.0011	0.33811	988.9	12	979.9	16	1007	1007	30	0.00918461	0.0297915	0.0297915
Z3-18Apr16-3B - 13	1.656	0.033	0.1657	0.003	0.54034	6.035	0.109264	0.0728	0.001	0.277	991.6	13	990	16	1012	1012	28	0.00161616	0.027668	0.027668
Z3-18Apr16-3B - 4	1.484	0.041	0.1481	0.0032	0.38254	6.75219	0.145895	0.07298	0.0011	0.14357	923	17	890	18	1013	1013	30	0.0370787	0.029615	0.029615
Z3-18Apr16-3B - 124	1.608	0.039	0.1609	0.003	0.11248	6.21504	0.11588	0.0732	0.0018	0.45668	973	15	962	17	1013	1013	50	0.0114345	0.0493583	0.0493583
Z3-18Apr16-3B - 150	1.633	0.038	0.1635	0.003	0.53101	6.11621	0.112224	0.07328	0.0011	0.28866	983	15	976	16	1020	1020	32	0.00717213	0.0313725	0.0313725
Z3-18Apr16-3B - 132	1.683	0.061	0.1657	0.0044	0.80087	6.035	0.160254	0.0734	0.0015	-0.24119	1001	23	988	25	1023	1023	42	0.0131579	0.0410557	0.0410557
Z3-18Apr16-3B - 51	1.69	0.053	0.1688	0.0032	0.36742	5.92417	0.112307	0.0733	0.0017	0.10583	1003	20	1005	18	1026	1026	49	-0.00199005	0.0477583	0.0477583
Z3-18Apr16-3B - 220	1.685	0.06	0.166	0.0058	0.8235	6.0241	0.21048	0.0735	0.0012	0.28565	1002	23	990	32	1027	1027	32	0.0121212	0.0311587	0.0311587
Z3-18Apr16-3B - 34	1.687	0.045	0.1652	0.0031	0.47022	6.05327	0.11359	0.0736	0.0015	0.14779	1003	17	986	17	1029	1029	41	0.0172414	0.0398445	0.0398445
Z4-18Apr16-3B - 62	1.662	0.039	0.1654	0.0042	0.75952	6.04595	0.153525	0.0737	0.0012	0.37955	994	15	987	23	1032	1032	33	0.0070922	0.0319767	0.0319767
Z4-18Apr16-3B - 60	1.684	0.037	0.1672	0.0031	0.47186	5.98086	0.110889	0.0738	0.0013	0.2632	1002	14	997	17	1033	1033	37	0.00501505	0.035818	0.035818
Z3-18Apr16-3B - 21	1.568	0.034	0.1533	0.0029	0.63371	6.52316	0.1234	0.07396	0.001	0.074906	957	14	919	16	1040	1040	28	0.0413493	0.0269231	0.0269231
Z3-18Apr16-3B - 173	1.694	0.044	0.169	0.0034	0.67524	5.91716	0.119043	0.0741	0.0014	0.074628	1006	17	1006	19	1043	1043	37	0	0.0354746	0.0354746
Z3-18Apr16-3B - 161	1.754	0.043	0.1702	0.0035	0.2205	5.87544	0.120823	0.0745	0.0017	0.44935	1028	16	1013	19	1051	1051	46	0.0148075	0.0437678	0.0437678
Z4-18Apr16-3B - 50	1.779	0.036	0.174	0.0034	0.53754	5.74713	0.1123	0.0747	0.0012	0.57922	1037.7	13	1034	19	1059	1059	33	0.00357834	0.0311615	0.0311615
Z4-18Apr16-3B - 24	1.864	0.058	0.1805	0.0035	0.54668	5.54017	0.107427	0.0747	0.0019	0.14126	1067	20	1070	19	1061	1061	50	-0.00280374	0.0471254	0.0471254
Z3-18Apr16-3B - 118	1.91	0.064	0.185	0.0038	0.43251	5.40541	0.11103	0.0746	0.0021	0.07367	1083	22	1094	20	1063	1063	58	-0.0100548	0.0545626	0.0545626
Z4-18Apr16-3B - 1	1.722	0.051	0.1687	0.0036	0.52535	5.92768	0.126495	0.0749	0.0018	0.093861	1016	19	1005	20	1064	1064	48	0.0109453	0.0451128	0.0451128
Z3-18Apr16-3B - 101	1.746	0.044	0.1701	0.0029	0.51334	5.87889	0.100228	0.0747	0.0015	0.039943	1028	17	1012.7	16	1064	1064	38	0.0151081	0.0357143	0.0357143
Z3-18Apr16-3B - 102	1.859	0.036	0.1793	0.0031	0.23082	5.57724	0.0964275	0.0748	0.0013	0.55203	1066.2	13	1063	17	1066	1066	35	0.00301035	0.032833	0.032833
Z3-18Apr16-3B - 9	1.817	0.037	0.1759	0.0031	0.58701	5.68505	0.100191	0.0751	0.0011	0.3781	1051.2	13	1045	17	1069	1069	30	0.00593301	0.0280636	0.0280636
Z3-18Apr16-3B - 174	1.753	0.05	0.1698	0.0035	0.83027	5.88928	0.121393	0.07524	0.0011	-0.22018	1027	19	1011	19	1073	1073	31	0.0158259	0.028891	0.028891
Z4-18Apr16-3B - 52	1.903	0.074	0.1824	0.0039	0.77243	5.48246	0.117224	0.0754	0.0018	-0.065664	1081	26	1080	21	1078	1078	49	0.000925926	0.0454545	0.0454545
Z3-18Apr16-3B - 7	1.765	0.037	0.17	0.0034	0.49113	5.88235	0.117647	0.0755	0.0014	0.3626	1033	14	1012	19	1079	1079	37	0.020751	0.034291	0.034291
Z3-18Apr16-3B - 93	1.687	0.04	0.1616	0.0032	0.70734	6.18812	0.122537	0.07552	0.0012	0.19313	1003	15	965	18	1081	1081	31	0.0393782	0.0286772	0.0286772
Z3-18Apr16-3B - 186	1.875	0.064	0.1788	0.0043	0.22398	5.59284	0.134503	0.0757	0.0017	-0.12039	1071	22	1060	24	1084	1084	45	0.0103774	0.0415129	0.0415129
Z4-18Apr16-3B - 2	1.885	0.04	0.1797	0.0033	0.66698	5.56483	0.102192	0.07611	0.0011	0.27356	1075	14	1065	18	1096	1096	28	0.00938967	0.0255474	0.0255474
Z4-18Apr16-3B - 67	1.895	0.078	0.1798	0.0046	0.53868	5.56174	0.142291	0.076	0.0025	0.070043	1082	26	1066	25	1100	1100	65	0.0150094	0.0590909	0.0590909
Z3-18Apr16-3B - 237	1.906	0.077	0.179	0.0054	0.41475	5.58659	0.168534	0.0768	0.003	0.26972	1081	27	1061	30	1112	1112	77	0.0188501	0.0692446	0.0692446
Z3-18Apr16-3B - 67	2.023	0.055	0.189	0.004	0.84968	5.29101	0.111979	0.0772	0.0012	0.17559	1122	18	1116	22	1123	1123	32	0.00537634	0.0284951	0.0284951
Z3-18Apr16-3B - 64	2.013	0.057	0.1877	0.0046	0.67814	5.32765	0.130566	0.0772	0.0014	0.072401	1119	19	1109	25	1124	1124	35	0.00901713	0.0311388	0.0311388
Z4-18Apr16-3B - 59	2.035	0.035	0.1923	0.0031	0.43198	5.20021	0.0838307	0.07719	0.0011	0.388	1127.2	12	1133.8	17	1124	1124	29	-0.00582113	0.0258007	0.0258007
Z3-18Apr16-3B - 98	1.867	0.046	0.1757	0.0033	0.56938	5.69152	0.106898	0.0772	0.0012	0.16837	1069	16	1043	18	1125	1125	31	0.0249281	0.0275556	0.0275556
Z3-18Apr16-3B - 55	1.952	0.048	0.1829	0.0045	0.48919	5.46747	0.134519	0.0774	0.0018	0.50905	1099	17	1083	24	1128	1128	46	0.0147738	0.0407801	0.0407801
Z4-18Apr16-3B - 6	2.012	0.048	0.1879	0.004	0.65578	5.32198	0.113294	0.0775	0.0014	0.055913	1119	16	1110	22	1131	1131	37	0.00810811	0.0327144	0.0327144
Z3-18Apr16-3B - 181	2.108	0.052	0.1958	0.0036	0.51734	5.10725	0.0939025	0.0775	0.0014	0.19105	1153	16	1153	20	1132	1132	36	0	0.0318021	0.0318021
Z4-18Apr16-3B - 11	1.994	0.037	0.1871	0.0031	0.52829	5.34474	0.0885552	0.07759	0.001	0.41136	1113.2	12	1105.4	17	1135	1135	26	0.00705627	0.0229075	0.0229075
Z3-18Apr16-3B - 226	2.048	0.052	0.1902	0.0032	0.47986	5.25762	0.0884563	0.0777	0.0014	0.1783	1131	17	1122.4	17	1136	1136	36	0.00766215	0.0316901	0.0316901
Z4-18Apr16-3B - 30	2.114	0.046	0.197	0.0036	0.39289	5.07614	0.092762	0.0777	0.0014	0.32627	1153	15	1159	20	1136	1136	35	-0.00517688	0.0308099	0.0308099
Z4-18Apr16-3B - 8	1.918	0.049	0.1802	0.0039	0.74123	5.54939	0.120103	0.0777	0.0012	0.10439	1087	17	1068	21	1138	1138	31	0.0177903	0.0272408	0.0272408
Z3-18Apr16-3B - 159	1.991	0.042	0.1837	0.0034	0.52614	5.44366	0.100754	0.07775	0.0012	0.21407	1112	14	1087	18	1139	1139	30	0.0229991	0.0263389	0.0263389
Z3-18Apr16-3B - 166	1.94	0.059	0.182	0.0039	0.57909	5.49451	0.117739	0.0778	0.0018	0.087659	1094	21	1078	21	1140	1140	46	0.0148423	0.0403509	0.0403509
Z4-18Apr16-3B - 41	2.06	0.067	0.1911	0.0045	0.41594	5.23286	0.123223	0.0779	0.0016	0.28772	1134	22	1127	24	1141	1141	41	0.00621118	0.0359334	0.0359334
Z3-18Apr16-3B - 191	2.048	0.05	0.192	0.0035	0.45461	5.20833	0.0949436	0.0774	0.0017	0.14451	1131	17	1132	19	1141	1141	42	-0.000883392	0.0368098	0.0368098
Z3-18Apr16-3B - 77	2.111	0.057	0.1954	0.0041	0.61251	5.11771	0.107383	0.078	0.0016	0.084878	1155	17	1151	22	1143	1143	41	0.00347524	0.0358705	0.0358705
Z3-18Apr16-3B - 8	1.726	0.063	0.1614	0.0054	0.72577	6.19579	0.207294	0.0781	0.0022	0.19217	1017	23	964	30	1145	1145	56	0.0549793	0.0489083	0.0489083
Z3-18Apr16-3B - 140	2.098	0.057	0.1952	0.0049	0.64345	5.12295	0.128599	0.0779	0.0015	0.28362	1147	19	1149	27	1148	1148	41	-0.00174064	0.0357143	0.0357143
Z3-18Apr16-3B - 103	1.989	0.044	0.1852	0.0039	0.84543	5.39957	0.113706	0.07792	0.001	0.053227	1112	15	1095	21	1148	1148	24	0.0155251	0.0209059	0.0209059
Z3-18Apr16-3B - 91	1.905	0.049	0.1761	0.0035	0.81731	5.67859	0.112862	0.0781	0.0014	0.041715	1087	15	1046	19	1149	1149	35	0.0391969	0.0304613	0.0304613
Z3-18Apr16-3B - 225	2.089	0.044	0.1938	0.0039	0.47236	5.15996	0.103838	0.0783	0.0012	0.3979	1145	14	1144	22	1152	1152	31	0.000874126	0.0269097	0.0269097
Z4-18Apr16-3B - 15	2.146	0.06	0.199	0.0039	0.49587	5.02513	0.0984824	0.0782	0.0018	0.082702	1165	19	1170	21	1153	1153	47	-0.0042735	0.0407632	0.0407632
Z3-18Apr16-3B - 182	2.068	0.067	0.1927	0.0049	0.55426	5.18941	0.131957	0.0783	0.0017	0.27375	1137	22	1136	26	1153	1153	44	0.000880282	0.0381613	0.0381613
Z3-18Apr16-3B - 58	2.015	0.048	0.1861	0.0043	0.51942	5.37346	0.124158	0.0784	0.0016	0.48248	1120	16	1100	23	1156	1156	40	0.0181818	0.0346021	0.0346021
Z3-18Apr16-3B - 187	2.072	0.043	0.192	0.0037	0.52415	5.20833	0.100369	0.0783	0.0014	0.39131	1141.2	13	1132	20	1156	1156	34	0.00812721	0.0294118	0.0294118
Z3-18Apr16-3B - 30	2.175	0.055	0.1997	0.0038	0.55374	5.00751	0.0952856	0.0783	0.0015	0.076338	1172	18	1174	20	1158	1158	40	-0.00170358	0.0345423	0.0345423
Z4-18Apr16-3B - 66	2.128	0.051	0.197	0.0037	0.7245	5.07614	0.0953387	0.0786	0.0016	-0.21003	1157	17	1162	19	1159	1159	41	-0.00430293	0.0353753	0.0353753
Z3-18Apr16-3B - 111	2.085	0.047	0.191	0.0033	0.32539	5.2356	0.090458	0.0783	0.0015	0.19562	1143	15	1127	18	1160	1160	40	0.014197	0.0344828	0.0344828
Z3-18Apr16-3B - 188	2.092	0.04	0.1934	0.0033	0.44072	5.17063	0.0882269	0.0786	0.0011	0.40444	1145.7	13	1139.5	18	1161	1161	28	0.00544098	0.0241171	0.0241171
Z3-18Apr16-3B - 15	2.081	0.043	0.1937	0.0041	0.29346	5.16262	0.109276	0.0786	0.0018	0.49442	1142	14	1141	22	1164	1164	45	0.000876424	0.0386598	0.0386598
Z3-18Apr16-3B - 240	2.038	0.037	0.1873	0.0033	0.40623	5.33903	0.0940672	0.07887	0.0011	0.488	1128.1	12	1106	18	1168	1168	27	0.0199819	0.0231164	0.0231164
Z3-18Apr16-3B - 50	2.172	0.049	0.1994	0.0039	0.78066	5.01505	0.0980876	0.079	0.0011	0.11448	1171	16	1172	21	1171	1171	27	-0.000853242	0.0230572	0.0230572
Z3-18Apr16-3B - 69	2.143	0.04	0.1959	0.0035	0.61675	5.10465	0.0912009	0.07909	0.001	0.4152	1163.9	13	1153	19	1173	1173	25	0.0094536	0.0213129	0.0213129
Z3-18Apr16-3B - 228	2.227	0.039	0.204	0.0034	0.56884	4.90196	0.0816993	0.07899	0.00096	0.44681	1189.5	12	1196.9	18	1174	1174	23	-0.00618264	0.0195911	0.0195911
Z4-18Apr16-3B - 22	2.155	0.054	0.1971	0.0035	0.25594	5.07357	0.0900938	0.0794	0.0017	0.28661	1166	18	1160	19	1177	1177	42	0.00517241	0.0356839	0.0356839
Z3-18Apr16-3B - 81	2.17	0.065	0.1982	0.0061	0.88707	5.04541	0.155283	0.0794	0.0013	0.5122	1170	21	1165	33	1180	1180	31	0.00429185	0.0262712	0.0262712
Z3-18Apr16-3B - 171	2.191	0.062	0.2014	0.0046	0.70226	4.96524	0.113407	0.0795	0.0017	-0.071207	1180	21	1183	25	1180	1180	41	-0.00253593	0.0347458	0.0347458
Z3-18Apr16-3B - 100	2.092	0.045	0.1919	0.0034	0.58497	5.21105	0.0923271	0.0794	0.0013	0.28096	1146	15	1131	19	1181	1181	31	0.0132626	0.0262489	0.0262489
Z4-18Apr16-3B - 9	2.165	0.049	0.1987	0.0038	0.59585	5.03271	0.0962471	0.0793	0.0014	0.16206	1169	16	1168	21	1182	1182	35	0.000856164	0.0296108	0.0296108
Z4-18Apr16-3B - 17	2.145	0.049	0.1965	0.0035	0.35433	5.08906	0.0906448	0.0793	0.0015	0.3891	1165	15	1156	19	1183	1183	39	0.00778547	0.032967	0.032967
Z3-18Apr16-3B - 139	2.175	0.044	0.1978	0.0041	0.83519	5.05561	0.104793	0.07952	0.00091	0.3499	1172.8	14	1164	22	1184	1184	23	0.00756014	0.0194257	0.0194257
Z4-18Apr16-3B - 46	2.186	0.058	0.2029	0.0049	0.51419	4.92854	0.119023	0.0797	0.0017	0.28015	1179	19	1190	26	1184	1184	42	-0.0092437	0.035473	0.035473
Z3-18Apr16-3B - 232	2.184	0.065	0.2004	0.0039	0.36685	4.99002	0.0971112	0.0788	0.0021	0.1976	1175	21	1177	21	1186	1186	52	-0.00169924	0.0438449	0.0438449
Z3-18Apr16-3B - 35	2.044	0.049	0.1867	0.0038	0.35974	5.35619	0.109017	0.0797	0.0016	0.43328	1130	17	1103	21	1188	1188	39	0.0244787	0.0328283	0.0328283
Z3-18Apr16-3B - 63	2.154	0.054	0.1951	0.0043	0.76887	5.12558	0.112968	0.0796	0.0013	0.12243	1165	17	1149	23	1190	1190	30	0.0139252	0.0252101	0.0252101
Z3-18Apr16-3B - 52	2.128	0.073	0.1929	0.0037	0.26426	5.18403	0.0994345	0.0802	0.0027	0.18949	1159	25	1137	20	1190	1190	67	0.0193492	0.0563025	0.0563025
Z4-18Apr16-3B - 19	2.157	0.062	0.198	0.0041	0.66189	5.05051	0.104581	0.08	0.0015	0.035518	1166	20	1164	22	1193	1193	39	0.00171821	0.0326907	0.0326907
Z3-18Apr16-3B - 62	2.126	0.07	0.1933	0.0048	0.58029	5.17331	0.128463	0.0804	0.002	0.060716	1163	23	1139	26	1201	1201	49	0.0210711	0.0407993	0.0407993
Z3-18Apr16-3B - 211	2.113	0.052	0.1917	0.0037	0.11132	5.21648	0.100683	0.0799	0.0018	0.44176	1153	17	1130	20	1201	1201	48	0.020354	0.0399667	0.0399667
Z3-18Apr16-3B - 246	2.272	0.052	0.2045	0.0045	0.79624	4.88998	0.107603	0.08022	0.0011	0.28311	1203	16	1199	24	1201	1201	26	0.00333611	0.0216486	0.0216486
Z3-18Apr16-3B - 121	2.181	0.074	0.1983	0.0043	0.79757	5.04286	0.109351	0.0803	0.0017	-0.29949	1174	24	1166	23	1202	1202	42	0.00686106	0.0349418	0.0349418
Z3-18Apr16-3B - 88	2.113	0.055	0.1921	0.0032	0.34974	5.20562	0.0867152	0.0801	0.0017	0.2011	1152	18	1132.5	18	1202	1202	39	0.0172185	0.0324459	0.0324459
Z3-18Apr16-3B - 178	2.103	0.05	0.1907	0.0048	0.4855	5.24384	0.13199	0.0805	0.0018	0.41079	1149	16	1125	26	1206	1206	45	0.0213333	0.0373134	0.0373134
Z3-18Apr16-3B - 202	2.154	0.053	0.1955	0.0044	0.54991	5.11509	0.115122	0.0805	0.0017	0.3038	1166	17	1151	24	1207	1207	42	0.0130321	0.034797	0.034797
Z3-18Apr16-3B - 12	2.264	0.055	0.2024	0.0042	0.84576	4.94071	0.102525	0.08051	0.0012	-0.11579	1201	17	1188	23	1209	1209	29	0.0109428	0.0239868	0.0239868
Z3-18Apr16-3B - 201	2.253	0.06	0.2051	0.0051	0.88443	4.87567	0.121238	0.08059	0.001	0.089819	1197	19	1202	27	1210	1210	26	-0.00415973	0.0214876	0.0214876
Z3-18Apr16-3B - 122	2.231	0.05	0.2005	0.0039	0.55279	4.98753	0.0970143	0.0807	0.0013	0.38528	1190	16	1178	21	1212	1212	30	0.0101868	0.0247525	0.0247525
Z3-18Apr16-3B - 151	2.187	0.077	0.1977	0.0051	0.799	5.05817	0.130484	0.0807	0.0016	-0.2088	1180	26	1163	28	1212	1212	38	0.0146174	0.0313531	0.0313531
Z4-18Apr16-3B - 48	2.083	0.041	0.1863	0.0037	0.68561	5.36769	0.106605	0.08088	0.0011	0.39326	1144.5	14	1101	20	1217	1217	28	0.0395095	0.0230074	0.0230074
Z3-18Apr16-3B - 99	2.367	0.056	0.2107	0.0043	0.63107	4.74608	0.0968589	0.081	0.0014	0.22126	1232	17	1233	23	1218	1218	35	-0.00081103	0.0287356	0.0287356
Z3-18Apr16-3B - 14	2.123	0.05	0.1896	0.0035	0.58819	5.27426	0.0973624	0.0812	0.0014	0.27708	1156	16	1119	19	1224	1224	35	0.0330652	0.0285948	0.0285948
Z3-18Apr16-3B - 254	2.127	0.057	0.192	0.0041	0.67931	5.20833	0.11122	0.0809	0.0017	-0.11974	1157	19	1132	22	1225	1225	39	0.0220848	0.0318367	0.0318367
Z3-18Apr16-3B - 57	2.327	0.058	0.2075	0.0048	0.86966	4.81928	0.111482	0.08129	0.0011	0.058016	1220	18	1215	26	1227	1227	27	0.00411523	0.0220049	0.0220049
Z3-18Apr16-3B - 42	2.197	0.067	0.1976	0.0043	0.40423	5.06073	0.110127	0.0809	0.0021	0.14665	1179	21	1162	23	1227	1227	46	0.0146299	0.0374898	0.0374898
Z4-18Apr16-3B - 36	2.206	0.064	0.1971	0.0039	0.54393	5.07357	0.10039	0.0812	0.0019	0.1551	1182	20	1159	21	1229	1229	44	0.0198447	0.0358015	0.0358015
Z3-18Apr16-3B - 16	2.121	0.058	0.1875	0.0056	0.91369	5.33333	0.159289	0.08183	0.001	0.44273	1155	19	1107	30	1241	1241	24	0.0433604	0.0193392	0.0193392
Z3-18Apr16-3B - 108	2.352	0.049	0.2082	0.004	0.83085	4.80307	0.0922781	0.08195	0.00097	0.13503	1228	15	1219	21	1244	1244	23	0.0073831	0.0184887	0.0184887
Z4-18Apr16-3B - 61	2.293	0.046	0.2054	0.0038	0.54678	4.86855	0.0900705	0.08201	0.0012	0.40399	1209.6	14	1204	20	1244	1244	28	0.00465116	0.022508	0.022508
Z4-18Apr16-3B - 20	2.402	0.068	0.2125	0.0047	0.84	4.70588	0.104083	0.08241	0.0012	-0.091836	1245	19	1242	25	1254	1254	28	0.00241546	0.0223285	0.0223285
Z3-18Apr16-3B - 196	2.4	0.054	0.2099	0.0045	0.73762	4.76417	0.102138	0.08247	0.0011	0.33068	1244	17	1231	23	1255	1255	26	0.0105605	0.0207171	0.0207171
Z3-18Apr16-3B - 138	2.34	0.068	0.2053	0.0063	0.8407	4.87092	0.149473	0.0828	0.0018	0.45397	1224	21	1203	33	1263	1263	44	0.0174564	0.0348377	0.0348377
Z3-18Apr16-3B - 256	2.37	0.044	0.2067	0.0041	0.67291	4.83793	0.0959628	0.08306	0.0012	0.56402	1233.4	13	1211	22	1269	1269	27	0.0184971	0.0212766	0.0212766
Z3-18Apr16-3B - 96	2.565	0.053	0.222	0.0043	0.20912	4.5045	0.0872494	0.0845	0.0017	0.47091	1290	15	1292	23	1301	1301	38	-0.00154799	0.0292083	0.0292083
Z3-18Apr16-3B - 258	2.661	0.065	0.2271	0.0043	0.57416	4.40335	0.0833747	0.0848	0.0016	0.29013	1317	18	1319	23	1308	1308	37	-0.0015163	0.0282875	0.0282875
Z3-18Apr16-3B - 165	2.606	0.049	0.2228	0.0039	0.51515	4.48833	0.0785659	0.08494	0.0012	0.30624	1301.9	14	1296	20	1313	1313	27	0.00455247	0.0205636	0.0205636
Z3-18Apr16-3B - 189	2.51	0.17	0.2073	0.0069	0.85867	4.82393	0.160565	0.0875	0.0039	-0.65454	1267	47	1214	37	1360	1360	77	0.0436573	0.0566176	0.0566176
Z3-18Apr16-3B - 45	2.987	0.073	0.2368	0.0049	0.38595	4.22297	0.0873842	0.091	0.0021	0.48496	1404	19	1370	25	1451	1451	41	0.0248175	0.0282564	0.0282564
Z3-18Apr16-3B - 22	3.929	0.076	0.2726	0.005	0.68647	3.66838	0.067285	0.10402	0.0013	0.28229	1619	16	1554	25	1697	1697	23	0.0418275	0.0135533	0.0135533
Z3-18Apr16-3B - 60	3.99	0.12	0.2765	0.0072	0.82865	3.61664	0.0941764	0.1052	0.0019	-0.11152	1635	26	1573	36	1716	1716	33	0.0394151	0.0192308	0.0192308
Z3-18Apr16-3B - 218	0.0003	0.0011	8e-05	2.2e-05	-0.22487	12500	3437.5	0.08	0.22	0.13522	0.3	1.1	0.51	0.14	-5500	0.51	0.14	-0.411765	0.27451	0.27451
Z3-18Apr16-3B - 71	0.00103	0.00053	8.6e-05	1.2e-05	0.065427	11627.9	1622.5	0.097	0.072	0.25469	1.04	0.54	0.553	0.078	300	0.553	0.078	0.880651	0.141049	0.141049
Z3-18Apr16-3B - 83	0.00064	0.00075	8.7e-05	1.3e-05	0.093125	11494.3	1717.53	0.099	0.076	0.11502	0.64	0.76	0.561	0.086	-600	0.561	0.086	0.14082	0.153298	0.153298
Z4-18Apr16-3B - 23	-0.0009	0.0017	9.2e-05	3.6e-05	0.3663	10869.6	4253.31	0.07	0.16	-0.9687	-0.9	1.7	0.6	0.23	-4800	0.6	0.23	-2.5	0.383333	0.383333
Z3-18Apr16-3B - 110	0.16	0.011	0.02452	0.00067	-0.16612	40.783	1.11438	0.0472	0.0035	0.44748	150.6	9.8	156.1	4.2	70	156.1	4.2	-0.0352338	0.0269058	0.0269058
Z3-18Apr16-3B - 47	0.169	0.013	0.02596	0.00063	0.1168	38.5208	0.934827	0.0474	0.0031	0.060383	160	10	165.2	4	80	165.2	4	-0.031477	0.0242131	0.0242131
Z3-18Apr16-3B - 185	0.334	0.026	0.0332	0.0015	0.46334	30.1205	1.36087	0.0757	0.0057	0.20236	296	21	210.4	9.2	1080	210.4	9.2	0.406844	0.0437262	0.0437262
Z3-18Apr16-3B - 152	0.328	0.02	0.0339	0.0026	-0.23077	29.4985	2.26242	0.0723	0.0069	0.82434	288	15	215	16	980	215	16	0.339535	0.0744186	0.0744186
Z3-18Apr16-3B - 230	0.281	0.013	0.03571	0.0008	0.38349	28.0034	0.627351	0.0571	0.0023	0.11631	251.3	10	226.2	5	500	226.2	5	0.110964	0.0221043	0.0221043
Z3-18Apr16-3B - 46	0.295	0.012	0.04276	0.00086	-0.092041	23.3863	0.470352	0.0506	0.002	0.43373	262.1	9.1	269.9	5.3	231	269.9	5.3	-0.0288996	0.0196369	0.0196369
Z4-18Apr16-3B - 38	0.303	0.017	0.04409	0.00087	0.043344	22.6809	0.447547	0.0505	0.0029	0.26439	270	14	278.2	5.4	210	278.2	5.4	-0.0294752	0.0194105	0.0194105
Z4-18Apr16-3B - 14	0.298	0.018	0.04426	0.0011	-0.50284	22.5938	0.561526	0.0481	0.0032	0.68675	266	15	279.2	6.6	150	279.2	6.6	-0.0472779	0.023639	0.023639
Z3-18Apr16-3B - 128	0.325	0.012	0.0465	0.0013	0.26629	21.5054	0.601226	0.0514	0.0021	0.29478	285.2	9.4	293.2	7.9	250	293.2	7.9	-0.0272851	0.0269441	0.0269441
Z3-18Apr16-3B - 112	1.204	0.055	0.1116	0.0049	0.79132	8.96057	0.39343	0.0786	0.0024	0.22918	801	25	681	29	1158	681	29	0.176211	0.0425844	0.0425844
Z4-18Apr16-3B - 45	1.588	0.076	0.1635	0.0039	0.26568	6.11621	0.145891	0.0713	0.0034	0.16631	962	30	976	22	940	940	100	-0.0143443	0.106383	0.106383
Z3-18Apr16-3B - 183	1.63	0.14	0.1622	0.0042	0.36107	6.16523	0.159642	0.0711	0.0053	-0.1022	969	53	969	23	950	950	160	0	0.168421	0.168421
Z3-18Apr16-3B - 207	1.7	0.16	0.1679	0.006	0.48493	5.95593	0.212838	0.0734	0.0065	0.018826	1003	59	1000	33	960	960	190	0.003	0.197917	0.197917
Z4-18Apr16-3B - 51	1.794	0.055	0.1805	0.0037	0.31521	5.54017	0.113566	0.0713	0.0015	0.38203	1042	20	1070	20	965	965	43	-0.0261682	0.0445596	0.0445596
Z3-18Apr16-3B - 203	1.483	0.043	0.1465	0.0032	0.78627	6.82594	0.149099	0.0734	0.0014	-0.17311	923	18	881	18	1023	1023	37	0.0476731	0.0361681	0.0361681
Z3-18Apr16-3B - 260	1.484	0.072	0.1406	0.006	0.90795	7.11238	0.303515	0.0758	0.0014	-0.09573	921	29	847	34	1087	1087	38	0.0873672	0.0349586	0.0349586
Z3-18Apr16-3B - 53	1.545	0.084	0.1444	0.0067	0.79271	6.92521	0.321322	0.0775	0.0025	0.28925	945	33	869	37	1125	1125	66	0.0874568	0.0586667	0.0586667
Z3-18Apr16-3B - 36	1.573	0.059	0.1441	0.0032	0.34116	6.93963	0.154107	0.0785	0.0025	0.14705	958	23	868	18	1166	1166	67	0.103687	0.0574614	0.0574614
Z3-18Apr16-3B - 20	1.685	0.062	0.152	0.0028	0.36428	6.57895	0.121191	0.0799	0.0025	0.065011	1001	23	912.1	15	1186	1186	62	0.0974674	0.0522766	0.0522766
Z3-18Apr16-3B - 107	2.127	0.067	0.1867	0.0054	0.93768	5.35619	0.154919	0.08249	0.001	-0.074548	1156	22	1103	29	1256	1256	25	0.0480508	0.0199045	0.0199045

## Sheet: Tec2
Analysis	Ratio 207Pb/235U	Error2S	Ratio 206Pb/238U	Error2S	rho	Ratio 238U/206Pb	Error2S	Ratio 207Pb/206Pb	Error2S	207Pb/235Pb Age (Ma)	Error2S	206Pb/238U Age (Ma)	Error2S	207Pb/206Pb Age (Ma)	Error2S	Prefered Age	Unc 2S	% disc. (6/8-7/5)	% Error 6/8 2S	Th/U
180416_4B__3.FIN2	0.1911	0.0061	0.02763	0.0005	0.25881	36.1925	0.65495	0.0504	0.0017	177.1	5.2	175.6	3.2	197	66	175.6	3.2	0.00854214	0.0182232	0.730643
180416_4B__116.FIN2	0.2295	0.0057	0.03021	0.0005	0.32932	33.1016	0.547859	0.0554	0.0014	209.4	4.7	191.8	3.1	404	54	191.8	3.1	0.0917623	0.0161627	0.916996
180416_4B__103.FIN2	0.272	0.01	0.03825	0.00056	0.12205	26.1438	0.382759	0.0516	0.002	242.8	8.1	241.9	3.5	237	77	241.9	3.5	0.00372055	0.0144688	0.842784
180416_4B__62.FIN2	0.3148	0.0082	0.04105	0.00062	0.41906	24.3605	0.36793	0.0557	0.0014	277.5	6.3	259.3	3.9	421	55	259.3	3.9	0.070189	0.0150405	1.22456
180416_4B__112.FIN2	0.363	0.011	0.04277	0.00071	0.55919	23.3809	0.388132	0.0615	0.0015	314.2	7.8	270	4.4	643	51	270	4.4	0.163704	0.0162963	1.39286
180416_4B__107.FIN2	0.335	0.021	0.0442	0.0013	0.42731	22.6244	0.665425	0.0551	0.0031	292	16	278.8	7.9	380	120	278.8	7.9	0.0473458	0.0283357	0.760471
180416_4B__26.FIN2	0.321	0.012	0.04463	0.00081	0.19406	22.4065	0.40666	0.052	0.0019	280.9	8.8	281.4	5	261	74	281.4	5	-0.00177683	0.0177683	0.406489
180416_4B__88.FIN2	0.321	0.011	0.04468	0.00082	0.27752	22.3814	0.410759	0.0519	0.0017	281.3	8.2	281.7	5.1	263	69	281.7	5.1	-0.00141995	0.0181044	0.774783
180416_4B__113.FIN2	0.3278	0.0086	0.04489	0.00066	0.57408	22.2767	0.327525	0.0527	0.0013	288	6.4	283	4.1	303	52	283	4.1	0.0176678	0.0144876	0.655118
180416_4B__44.FIN2	0.326	0.014	0.0449	0.0011	0.31723	22.2717	0.545632	0.053	0.0022	285	10	283	7	293	83	283	7	0.00706714	0.024735	0.777494
180416_4B__85.FIN2	0.323	0.015	0.0449	0.0012	0.46349	22.2717	0.595235	0.0523	0.0021	283	11	283.2	7.3	278	85	283.2	7.3	-0.000706215	0.0257768	0.787484
180416_4B__73.FIN2	0.335	0.01	0.04495	0.00073	0.49688	22.2469	0.361296	0.0539	0.0015	292.9	7.9	283.4	4.5	347	59	283.4	4.5	0.0335215	0.0158786	1.02932
180416_4B__41.FIN2	0.351	0.015	0.0453	0.0011	0.093219	22.0751	0.536039	0.0565	0.0026	305	11	285.5	6.6	450	100	285.5	6.6	0.0683012	0.0231173	0.117597
180416_4B__124.FIN2	0.333	0.01	0.04531	0.00086	0.4571	22.0702	0.4189	0.0537	0.0015	291.3	7.8	285.6	5.3	335	61	285.6	5.3	0.019958	0.0185574	1.13052
180416_4B__14.FIN2	0.3291	0.0097	0.04538	0.00061	0.27006	22.0361	0.296211	0.0522	0.0015	289.1	7.1	286.1	3.8	275	59	286.1	3.8	0.0104858	0.0132821	0.678082
180416_4B__28.FIN2	0.34	0.01	0.04557	0.00065	0.19432	21.9443	0.313008	0.0538	0.0017	297.5	7.7	287.2	4	342	66	287.2	4	0.0358635	0.0139276	0.741497
180416_4B__31.FIN2	0.3162	0.0092	0.04572	0.00073	0.33513	21.8723	0.349229	0.0498	0.0014	278.3	7.1	288.2	4.5	190	58	288.2	4.5	-0.0343511	0.0156142	0.920981
180416_4B__39.FIN2	0.3328	0.0087	0.0458	0.00099	0.61828	21.8341	0.471959	0.0529	0.0012	290.9	6.6	288.6	6.1	305	47	288.6	6.1	0.00796951	0.0211365	0.710037
180416_4B__42.FIN2	0.326	0.011	0.04589	0.00066	0.078075	21.7912	0.313406	0.0518	0.0019	285.4	8.4	289.2	4.1	259	73	289.2	4.1	-0.0131397	0.014177	0.417411
180416_4B__54.FIN2	0.342	0.014	0.04594	0.0008	0.096358	21.7675	0.37906	0.0538	0.0022	297	10	289.5	4.9	335	83	289.5	4.9	0.0259067	0.0169257	0.824362
180416_4B__115.FIN2	0.3351	0.0079	0.04608	0.00068	0.49565	21.7014	0.320246	0.0531	0.0011	292.8	6	290.3	4.2	313	46	290.3	4.2	0.00861178	0.0144678	1.31565
180416_4B__32.FIN2	0.331	0.0088	0.04609	0.00069	0.21989	21.6967	0.324815	0.0519	0.0014	289.5	6.7	290.4	4.3	270	57	290.4	4.3	-0.00309917	0.0148072	0.814724
180416_4B__33.FIN2	0.32	0.01	0.04621	0.00071	0.24251	21.6403	0.332496	0.0503	0.0016	280.8	7.8	291.2	4.4	192	65	291.2	4.4	-0.0357143	0.0151099	1.00412
180416_4B__43.FIN2	0.327	0.0085	0.04662	0.00056	0.17665	21.45	0.257658	0.0511	0.0014	286.5	6.5	293.7	3.4	227	55	293.7	3.4	-0.0245148	0.0115764	0.856528
180416_4B__125.FIN2	0.3321	0.0099	0.04665	0.00073	0.35241	21.4362	0.335444	0.0518	0.0015	290.1	7.5	293.9	4.5	257	59	293.9	4.5	-0.0129296	0.0153113	0.936634
180416_4B__78.FIN2	0.3464	0.0083	0.04667	0.00056	0.22984	21.427	0.257106	0.0536	0.0012	301.3	6.2	294	3.4	341	51	294	3.4	0.0248299	0.0115646	0.659134
180416_4B__16.FIN2	0.3442	0.0095	0.04674	0.00066	0.43007	21.395	0.302111	0.0532	0.0013	299.6	7.1	294.4	4.1	317	54	294.4	4.1	0.017663	0.0139266	0.907824
180416_4B__22.FIN2	0.3463	0.009	0.04698	0.00087	0.41001	21.2857	0.394179	0.0533	0.0014	301	6.8	295.9	5.3	323	55	295.9	5.3	0.0172356	0.0179115	1.04384
180416_4B__140.FIN2	0.326	0.0076	0.04705	0.00074	0.42348	21.254	0.334282	0.0504	0.0011	285.8	5.9	296.3	4.6	205	47	296.3	4.6	-0.0354371	0.0155248	0.927398
180416_4B__57.FIN2	0.3407	0.0064	0.04708	0.00051	0.31144	21.2404	0.23009	0.0525	0.001	297.3	4.9	296.5	3.1	291	43	296.5	3.1	0.00269815	0.0104553	0.497561
180416_4B__94.FIN2	0.3439	0.0068	0.04711	0.00053	0.21798	21.2269	0.238808	0.053	0.0011	299.8	5.1	296.7	3.2	314	46	296.7	3.2	0.0104483	0.0107853	1.83777
180416_4B__71.FIN2	0.3665	0.0066	0.04753	0.0007	0.25937	21.0393	0.309858	0.0558	0.0011	316.6	4.9	299.3	4.3	438	45	299.3	4.3	0.0578015	0.0143669	2.12481
180416_4B__122.FIN2	0.379	0.021	0.0476	0.0011	0.18027	21.0084	0.485488	0.0576	0.0033	327	16	299.8	6.8	480	120	299.8	6.8	0.0907272	0.0226818	0.576923
180416_4B__45.FIN2	0.3431	0.009	0.04768	0.00059	0.14433	20.9732	0.259525	0.0524	0.0014	298.6	6.8	300.2	3.6	278	57	300.2	3.6	-0.00532978	0.011992	0.669096
180416_4B__79.FIN2	0.3564	0.0095	0.04781	0.00068	0.27277	20.9161	0.297489	0.054	0.0015	308.7	7.1	301	4.2	347	58	301	4.2	0.0255814	0.0139535	0.717604
180416_4B__49.FIN2	0.374	0.018	0.0479	0.0012	0.38202	20.8768	0.52301	0.0565	0.0025	322	13	301.8	7.3	436	96	301.8	7.3	0.0669317	0.0241882	1.09504
180416_4B__20.FIN2	0.358	0.011	0.04793	0.00068	0.074199	20.8638	0.296002	0.0543	0.0018	309.6	8.1	301.8	4.2	345	69	301.8	4.2	0.0258449	0.0139165	0.713101
180416_4B__118.FIN2	0.3476	0.0063	0.04822	0.00065	0.4262	20.7383	0.27955	0.05232	0.00089	302.5	4.7	303.5	4	289	38	303.5	4	-0.00329489	0.0131796	0.611396
180416_4B__55.FIN2	0.3445	0.0073	0.04829	0.00052	0.2218	20.7082	0.222992	0.0516	0.0011	300	5.5	304	3.2	259	46	304	3.2	-0.0131579	0.0105263	1.32852
180416_4B__23.FIN2	0.347	0.01	0.0484	0.0012	0.04616	20.6612	0.51226	0.0524	0.002	302.4	7.7	304.5	7.2	288	82	304.5	7.2	-0.00689655	0.0236453	0.66581
180416_4B__56.FIN2	0.3577	0.0064	0.04846	0.00059	0.23838	20.6356	0.251238	0.0538	0.0011	310.1	4.8	305.1	3.6	348	43	305.1	3.6	0.0163881	0.0117994	1.53316
180416_4B__21.FIN2	0.3422	0.0076	0.04856	0.00061	0.27728	20.5931	0.258686	0.0508	0.0012	298.2	5.8	305.6	3.8	220	48	305.6	3.8	-0.0242147	0.0124346	0.924036
180416_4B__80.FIN2	0.3652	0.0073	0.04873	0.00046	0.23704	20.5212	0.193716	0.0542	0.0011	315.5	5.5	306.7	2.8	362	45	306.7	2.8	0.0286925	0.00912944	1.1223
180416_4B__6.FIN2	0.381	0.017	0.0488	0.0017	0.77705	20.4918	0.713854	0.056	0.0016	325	13	307	10	425	61	307	10	0.0586319	0.0325733	0.266323
180416_4B__61.FIN2	0.363	0.01	0.04878	0.00071	0.24859	20.5002	0.298383	0.0538	0.0015	313.3	7.8	307	4.4	339	61	307	4.4	0.0205212	0.0143322	0.375516
180416_4B__97.FIN2	0.3553	0.0053	0.04985	0.00053	0.42684	20.0602	0.213278	0.05175	0.00071	308.4	4	313.6	3.3	262	31	313.6	3.3	-0.0165816	0.010523	0.582342
180416_4B__5.FIN2	0.3971	0.0089	0.05311	0.00048	0.29555	18.8288	0.170172	0.0541	0.0012	339.5	6.6	333.5	3	360	47	333.5	3	0.017991	0.0089955	1.41683
180416_4B__10.FIN2	0.533	0.057	0.0653	0.0047	0.55428	15.3139	1.10223	0.059	0.0051	433	38	408	29	550	190	408	29	0.0612745	0.0710784	0.819355
180416_4B__70.FIN2	0.606	0.04	0.0799	0.0031	0.55643	12.5156	0.485588	0.0548	0.0031	479	25	495	19	380	120	495	19	-0.0323232	0.0383838	0.58156
180416_4B__126.FIN2	0.688	0.016	0.0862	0.001	0.3314	11.6009	0.134582	0.0577	0.0012	531.6	9.2	533.1	6	509	47	533.1	6	-0.00281373	0.0112549	3.36196
180416_4B__137.FIN2	0.828	0.015	0.1005	0.0016	0.55073	9.95025	0.158412	0.0602	0.0011	611.9	8.3	617.5	9.6	611	36	617.5	9.6	-0.00906883	0.0155466	0.154611
180416_4B__129.FIN2	0.971	0.019	0.1062	0.002	0.75418	9.4162	0.177329	0.06631	0.0009	688	9.8	650	12	811	29	650	12	0.0584615	0.0184615	0.133233
180416_4B__137.FIN2	0.996	0.04	0.1134	0.0036	0.39506	8.81834	0.279947	0.0639	0.0024	700	20	692	21	718	81	692	21	0.0115607	0.0303468	0.794025
180416_4B__14.FIN2	1.29	0.1	0.138	0.012	0.53718	7.24638	0.63012	0.0675	0.0034	833	45	832	66	830	110	830	110	0.00120192	0.13253	0.695652
180416_4B__25.FIN2	1.375	0.041	0.1432	0.0024	0.25109	6.98324	0.117038	0.0693	0.0021	877	17	863	14	898	62	898	62	0.0162225	0.0690423	1.71225
180416_4B__15.FIN2	1.578	0.043	0.1623	0.004	0.5835	6.16143	0.151853	0.0707	0.0017	957	17	968	22	924	49	924	49	-0.0113636	0.0530303	0.551139
180416_4B__13.FIN2	1.668	0.031	0.1712	0.0026	0.61121	5.84112	0.0887086	0.0704	0.0011	994	12	1018	14	930	31	930	31	-0.0235756	0.0333333	0.761012
180416_4B__76.FIN2	1.616	0.017	0.1656	0.0016	0.64402	6.03865	0.0583444	0.07066	0.00064	975.6	6.7	987.4	9.1	943	19	943	19	-0.0119506	0.0201485	0.577551
180416_4B__128.FIN2	1.64	0.023	0.1684	0.0019	0.66547	5.93824	0.0669992	0.07071	0.00077	984.2	9	1003	11	943	22	943	22	-0.0187438	0.0233298	0.103513
180416_4B__27.FIN2	1.571	0.05	0.1606	0.0038	0.66258	6.22665	0.14733	0.071	0.0017	956	20	960	21	948	48	948	48	-0.00416667	0.0506329	0.508475
180416_4B__139.FIN2	1.575	0.016	0.1619	0.0015	0.64101	6.17665	0.0572265	0.0708	0.00058	960.3	6.3	967.1	8.3	948	17	948	17	-0.00703133	0.0179325	0.191983
180416_4B__52.FIN2	1.653	0.033	0.1688	0.0023	0.46304	5.92417	0.0807203	0.0711	0.0013	991	12	1005	13	948	37	948	37	-0.0139303	0.0390295	0.31087
180416_4B__109.FIN2	1.524	0.026	0.1549	0.0024	0.70419	6.45578	0.100025	0.07142	0.00099	938	10	928	13	959	29	959	29	0.0107759	0.0302398	0.311078
180416_4B__93.FIN2	1.631	0.023	0.1659	0.002	0.46175	6.02773	0.072667	0.07143	0.00099	980.8	8.7	989	11	960	28	960	28	-0.0082912	0.0291667	0.514212
180416_4B__89.FIN2	1.607	0.027	0.1634	0.003	0.67563	6.11995	0.112361	0.07122	0.00095	971	11	975	16	962	26	962	26	-0.00410256	0.027027	0.0952588
180416_4B__41.FIN2	1.605	0.021	0.1619	0.0019	0.37921	6.17665	0.072487	0.07169	0.00095	971.9	8.1	967	11	975	27	975	27	0.00506722	0.0276923	0.64365
180416_4B__12.FIN2	1.741	0.02	0.1745	0.0016	0.2414	5.73066	0.0525447	0.07226	0.00096	1024	7.8	1036.7	8.7	986	27	986	27	-0.0122504	0.0273834	0.262857
180416_4B__95.FIN2	1.472	0.021	0.1476	0.002	0.68711	6.77507	0.0918031	0.07236	0.00081	918.9	8.6	887	11	990	23	990	23	0.0359639	0.0232323	0.442643
180416_4B__64.FIN2	1.724	0.033	0.1745	0.0048	0.67226	5.73066	0.157634	0.072	0.0014	1017	12	1036	26	993	36	993	36	-0.0183398	0.0362538	1.1626
180416_4B__82.FIN2	1.649	0.022	0.1654	0.0019	0.70034	6.04595	0.0694517	0.07233	0.00074	988	8.3	986	10	993	20	993	20	0.0020284	0.020141	0.434582
180416_4B__86.FIN2	1.632	0.031	0.1628	0.0023	0.57578	6.14251	0.0867799	0.0726	0.0011	982	12	972	13	998	32	998	32	0.0102881	0.0320641	0.469475
180416_4B__102.FIN2	1.53	0.029	0.1525	0.0026	0.63519	6.55738	0.111798	0.0727	0.0011	941	11	915	15	998	31	998	31	0.0284153	0.0310621	0.694981
180416_4B__50.FIN2	1.593	0.033	0.1579	0.002	0.33324	6.33312	0.0802169	0.0732	0.0015	964	13	945	11	999	41	999	41	0.0201058	0.041041	0.452329
180416_4B__136.FIN2	1.605	0.033	0.1609	0.0035	0.58698	6.21504	0.135194	0.0728	0.0014	971	13	960	19	999	39	999	39	0.0114583	0.039039	0.389408
180416_4B__108.FIN2	1.708	0.03	0.1699	0.0021	0.73098	5.88582	0.0727499	0.07268	0.00087	1010	11	1011	12	999	24	999	24	-0.00098912	0.024024	1.02507
180416_4B__8.FIN2	1.747	0.025	0.1726	0.0019	0.59763	5.79374	0.0637782	0.073	0.00088	1024.3	9.3	1026	11	1006	24	1006	24	-0.00165692	0.0238569	0.322188
180416_4B__121.FIN2	1.641	0.034	0.1625	0.0035	0.69669	6.15385	0.132544	0.0736	0.0012	986	13	970	20	1018	33	1018	33	0.0164948	0.0324165	0.304834
180416_4B__36.FIN2	1.653	0.019	0.1631	0.0016	0.559	6.13121	0.0601467	0.07337	0.00077	990.6	7.6	973.6	8.6	1019	22	1019	22	0.017461	0.0215898	0.31028
180416_4B__111.FIN2	1.735	0.018	0.1719	0.0016	0.47497	5.81734	0.0541462	0.07314	0.00069	1021	6.5	1022.4	8.8	1019	20	1019	20	-0.00136933	0.0196271	0.909091
180416_4B__92.FIN2	1.679	0.041	0.167	0.0032	0.57546	5.98802	0.114741	0.0733	0.0015	1001	16	995	18	1020	41	1020	41	0.00603015	0.0401961	0.657009
180416_4B__107.FIN2	1.714	0.041	0.1687	0.0034	0.58069	5.92768	0.119467	0.0736	0.0015	1012	15	1004	19	1022	41	1022	41	0.00796813	0.0401174	0.30401
180416_4B__98.FIN2	1.727	0.046	0.1707	0.0047	0.70192	5.85823	0.161299	0.0737	0.0015	1017	17	1015	26	1025	42	1025	42	0.00197044	0.0409756	0.255109
180416_4B__7.FIN2	1.793	0.028	0.1753	0.0023	0.62858	5.70451	0.0748452	0.07387	0.00095	1041	10	1041	12	1030	26	1030	26	0	0.0252427	0.635846
180416_4B__34.FIN2	1.857	0.037	0.1819	0.0033	0.7993	5.49753	0.0997352	0.07398	0.00091	1063	13	1076	18	1033	25	1033	25	-0.0120818	0.0242014	0.470526
180416_4B__24.FIN2	1.53	0.077	0.1504	0.0068	0.95385	6.64894	0.300617	0.0737	0.0011	935	31	901	38	1034	29	1034	29	0.0377358	0.0280464	0.111714
180416_4B__1.FIN2	1.773	0.037	0.1733	0.0032	0.66535	5.77034	0.10655	0.0742	0.0012	1032	14	1031	17	1034	34	1034	34	0.000969932	0.032882	1.06263
180416_4B__90.FIN2	1.711	0.025	0.1676	0.0019	0.61656	5.96659	0.0676403	0.07403	0.00084	1012.2	9.4	1000	10	1036	23	1036	23	0.0122	0.0222008	0.478737
180416_4B__29.FIN2	1.871	0.047	0.1816	0.0034	0.61878	5.50661	0.103097	0.0745	0.0014	1066	16	1075	19	1040	40	1040	40	-0.00837209	0.0384615	0.918103
180416_4B__27.FIN2	1.974	0.038	0.1912	0.0027	0.66491	5.23013	0.0738564	0.0745	0.0011	1105	13	1127	15	1050	29	1050	29	-0.0195209	0.027619	0.430059
180416_4B__2.FIN2	1.645	0.02	0.1596	0.0014	0.68707	6.26566	0.054962	0.0745	0.00066	987.7	8	954.3	8	1052	18	1052	18	0.0349995	0.0171103	0.263719
180416_4B__104.FIN2	1.469	0.04	0.1423	0.0029	0.64266	7.02741	0.143215	0.075	0.0016	916	17	858	16	1061	43	1061	43	0.0675991	0.0405278	0.478261
180416_4B__9.FIN2	1.881	0.029	0.1811	0.0021	0.60332	5.52181	0.0640298	0.07503	0.0009	1072	10	1072	11	1068	25	1068	25	0	0.0234082	0.276719
180416_4B__35.FIN2	1.845	0.034	0.1766	0.0025	0.59658	5.66251	0.0801602	0.0755	0.0011	1059	12	1048	14	1072	29	1072	29	0.0104962	0.0270522	0.468504
180416_4B__60.FIN2	2.163	0.046	0.206	0.0036	0.75635	4.85437	0.0848336	0.0757	0.001	1165	15	1206	19	1086	28	1086	28	-0.0339967	0.0257827	0.492894
180416_4B__59.FIN2	2.156	0.033	0.2063	0.0026	0.67655	4.84731	0.0610907	0.07604	0.00092	1168	11	1208	14	1089	24	1089	24	-0.0331126	0.0220386	0.701613
180416_4B__46.FIN2	1.997	0.022	0.1904	0.0017	0.42395	5.2521	0.0468938	0.07604	0.00083	1114.3	7.7	1123.2	9.3	1090	22	1090	22	-0.00792379	0.0201835	0.628528
180416_4B__30.FIN2	1.903	0.034	0.1807	0.0024	0.81123	5.53403	0.0735013	0.076	0.00074	1080	12	1070	13	1093	20	1093	20	0.00934579	0.0182983	0.5125
180416_4B__37.FIN2	2.056	0.043	0.1948	0.004	0.6893	5.13347	0.10541	0.0766	0.0012	1131	14	1146	21	1096	33	1096	33	-0.013089	0.0301095	0.464272
180416_4B__67.FIN2	1.985	0.052	0.1871	0.0033	0.73371	5.34474	0.0942684	0.0767	0.0014	1105	18	1105	18	1098	35	1098	35	0	0.0318761	0.412869
180416_4B__77.FIN2	2.062	0.055	0.1953	0.004	0.71342	5.12033	0.104871	0.0763	0.0014	1135	18	1150	21	1099	37	1099	37	-0.0130435	0.033667	0.389853
180416_4B__38.FIN2	1.799	0.021	0.1715	0.0015	0.44999	5.8309	0.0509992	0.07636	0.00085	1044.5	7.5	1020.4	8	1100	22	1100	22	0.0236182	0.02	1.16471
180416_4B__51.FIN2	2.011	0.031	0.1896	0.0029	0.82721	5.27426	0.0806717	0.07688	0.00072	1117	11	1118	16	1114	19	1114	19	-0.000894454	0.0170557	0.3125
180416_4B__48.FIN2	1.871	0.032	0.1755	0.0021	0.66132	5.69801	0.0681813	0.07725	0.00096	1069	11	1042	12	1120	25	1120	25	0.0259117	0.0223214	0.185526
180416_4B__17.FIN2	1.531	0.06	0.1436	0.0048	0.76032	6.96379	0.232773	0.0775	0.0021	940	24	864	27	1127	53	1127	53	0.087963	0.0470275	0.458637
180416_4B__89.FIN2	2.017	0.059	0.1874	0.0041	0.46225	5.33618	0.116747	0.0778	0.0021	1120	20	1107	22	1137	54	1137	54	0.0117435	0.0474934	0.52644
180416_4B__120.FIN2	2.335	0.039	0.2169	0.003	0.41337	4.61042	0.0637679	0.0784	0.0013	1220	12	1265	16	1147	33	1147	33	-0.0355731	0.0287707	0.705556
180416_4B__138.FIN2	1.766	0.04	0.1638	0.0038	0.70778	6.10501	0.14163	0.0787	0.0014	1029	15	977	21	1154	35	1154	35	0.0532242	0.0303293	0.899143
180416_4B__106.FIN2	2.225	0.041	0.2054	0.0031	0.7412	4.86855	0.0734786	0.07851	0.00095	1186	13	1203	17	1156	24	1156	24	-0.0141313	0.0207612	0.341298
180416_4B__69.FIN2	2.146	0.036	0.1972	0.0031	0.68537	5.07099	0.0797164	0.0787	0.001	1163	12	1160	17	1160	26	1160	26	0.00258621	0.0224138	0.565636
180416_4B__66.FIN2	2.108	0.029	0.1933	0.0025	0.5605	5.17331	0.0669077	0.07877	0.00096	1150.2	9.4	1139	14	1165	25	1165	25	0.00983319	0.0214592	0.577114
180416_4B__83.FIN2	1.994	0.053	0.1817	0.0036	0.81541	5.50358	0.109042	0.0792	0.0012	1107	18	1075	20	1170	30	1170	30	0.0297674	0.025641	0.382278
180416_4B__40.FIN2	2.139	0.022	0.1952	0.0021	0.74331	5.12295	0.0551137	0.07942	0.0007	1160.4	7.3	1149	11	1179	17	1179	17	0.00992167	0.014419	0.913386
180416_4B__65.FIN2	2.271	0.032	0.2064	0.0022	0.49553	4.84496	0.051642	0.0797	0.001	1202.6	9.9	1209	12	1181	26	1181	26	-0.00529363	0.0220152	0.442947
180416_4B__18.FIN2	1.808	0.056	0.1639	0.0048	0.94766	6.10128	0.178683	0.07952	0.00074	1043	21	977	26	1182	18	1182	18	0.0675537	0.0152284	1.50297
180416_4B__4.FIN2	2.328	0.047	0.2115	0.0028	0.71468	4.72813	0.0625947	0.0797	0.0011	1219	14	1236	15	1182	26	1182	26	-0.013754	0.0219966	0.130952
180416_4B__105.FIN2	2.246	0.049	0.203	0.0045	0.56325	4.92611	0.109199	0.0803	0.0017	1192	15	1190	24	1194	42	1194	42	0.00168067	0.0351759	0.927914
180416_4B__11.FIN2	2.046	0.072	0.1845	0.0063	0.94859	5.42005	0.185075	0.08012	0.00095	1122	24	1089	34	1198	23	1198	23	0.030303	0.0191987	0.3
180416_4B__23.FIN2	2.253	0.056	0.2031	0.004	0.32469	4.92368	0.0969706	0.0805	0.0016	1199	19	1191	21	1203	41	1203	41	0.00671704	0.0340815	0.759259
180416_4B__72.FIN2	2.059	0.026	0.185	0.0022	0.45505	5.40541	0.0642805	0.0803	0.001	1135.4	9	1094	12	1204	27	1204	27	0.0378428	0.0224252	0.824281
180416_4B__81.FIN2	2.325	0.031	0.2087	0.0024	0.65598	4.79157	0.0551019	0.08054	0.00085	1218.5	9.6	1221	13	1206	21	1206	21	-0.0020475	0.0174129	0.381395
180416_4B__117.FIN2	2.081	0.037	0.1865	0.0024	0.5028	5.36193	0.0690007	0.0811	0.0013	1140	12	1102	13	1214	32	1214	32	0.0344828	0.0263591	0.673684
180416_4B__92.FIN2	2.381	0.067	0.2094	0.0046	0.51428	4.77555	0.104907	0.0823	0.002	1236	20	1225	25	1247	48	1247	48	0.00897959	0.0384924	0.864407
180416_4B__10.FIN2	2.517	0.034	0.2177	0.0023	0.39612	4.59348	0.0485301	0.0835	0.0011	1275.7	9.9	1270	12	1276	26	1276	26	0.00448819	0.0203762	0.636553
180416_4B__123.FIN2	2.723	0.056	0.2247	0.0052	0.68077	4.45038	0.102991	0.0886	0.0016	1331	15	1305	27	1385	34	1385	34	0.0199234	0.0245487	0.725731
180416_4B__86.FIN2	2.951	0.093	0.23	0.005	0.61825	4.34783	0.094518	0.0922	0.0023	1392	24	1334	26	1464	48	1464	48	0.0434783	0.0327869	0.988571
180416_4B__64.FIN2	4.4	0.15	0.3032	0.0078	0.21996	3.29815	0.0848469	0.1035	0.002	1709	29	1706	38	1684	37	1684	37	0.0017585	0.0219715	0.743243
180416_4B__24.FIN2	4.01	0.13	0.2589	0.0075	0.89976	3.8625	0.111892	0.1116	0.0016	1630	27	1482	38	1822	27	1822	27	0.099865	0.0148189	0.745033

## Sheet: Tec3
Analysis	Ratio 207Pb/235U	Error2S	Ratio 206Pb/238U	Error2S	rho	Ratio 238U/206Pb	Error2S	Ratio 207Pb/206Pb	Error2S	207Pb/235Pb Age (Ma)	Error2S	206Pb/238U Age (Ma)	Error2S	207Pb/206Pb Age (Ma)	Error2S	Prefered Age	Unc 2S	% disc. (6/8-7/5)	% Error 6/8 2S	Th/U
Z4-15Apr16-4E - 1	0.35	0.035	0.0466	0.0024	-0.023119	21.4592	1.1052	0.0526	0.0056	303	26	293	15	330	230	293	15	0.0341297	0.0511945	0.0127869
Z4-15Apr16-4E - 10	0.3075	0.011	0.0425	0.00088	-0.011034	23.5294	0.487197	0.0526	0.0019	272	8.4	268.3	5.4	299	83	268.3	5.4	0.0137905	0.0201267	0.550098
Z4-15Apr16-4E - 11	0.329	0.016	0.04466	0.00097	0.34894	22.3914	0.486334	0.0528	0.0023	288	12	281.6	6	321	100	281.6	6	0.0227273	0.0213068	0.394636
Z4-15Apr16-4E - 12	0.335	0.017	0.04571	0.0011	0.21793	21.8771	0.526466	0.053	0.0025	293	13	288.1	6.5	350	110	288.1	6.5	0.017008	0.0225616	1.7707
Z4-15Apr16-4E - 13	0.321	0.014	0.04437	0.00099	-0.15543	22.5378	0.502871	0.0528	0.0023	282.3	10	279.8	6.1	304	94	279.8	6.1	0.00893495	0.0218013	0.588448
Z4-15Apr16-4E - 14	0.347	0.013	0.04769	0.0011	0.40392	20.9688	0.483658	0.0535	0.002	304.2	11	300.3	6.9	336	82	300.3	6.9	0.012987	0.022977	0.605463
Z4-15Apr16-4E - 15	2.292	0.067	0.2082	0.0056	0.82571	4.80307	0.129189	0.079	0.0014	1208	20	1219	29	1180	37	1180	37	-0.00902379	0.0313559	0.536913
Z4-15Apr16-4E - 16	2.213	0.054	0.2	0.0039	0.45341	5	0.0975	0.08	0.0016	1184	17	1175	21	1195	39	1195	39	0.00765957	0.032636	0.301299
Z4-15Apr16-4E - 17	2.163	0.041	0.2024	0.0032	0.32686	4.94071	0.078114	0.0778	0.0013	1168.9	13	1188.3	17	1141	32	1141	32	-0.0163258	0.0280456	0.335169
Z4-15Apr16-4E - 18	1.579	0.032	0.1596	0.0032	0.38863	6.26566	0.125627	0.07154	0.0011	964	14	955	18	971	33	971	33	0.00942408	0.0339856	0.196787
Z4-15Apr16-4E - 19	1.58	0.028	0.16033	0.0024	0.50713	6.23714	0.0933645	0.07147	0.0009	962	11	958.6	14	970	26	970	26	0.00354684	0.0268041	0.125968
Z4-15Apr16-4E - 2	2.233	0.04	0.2018	0.0033	0.46939	4.9554	0.0810348	0.0798	0.001	1191.1	13	1185.1	18	1191	26	1191	26	0.00506286	0.0218304	0.219789
Z4-15Apr16-4E - 20	0.314	0.014	0.04288	0.0009	0.15951	23.3209	0.489478	0.0536	0.0024	277	11	270.6	5.6	334	98	270.6	5.6	0.0236511	0.0206948	0.807437
Z4-15Apr16-4E - 21	0.315	0.017	0.04382	0.001	-0.1435	22.8206	0.520781	0.052	0.0029	277	13	276.4	6.3	290	120	276.4	6.3	0.00217077	0.0227931	0.537805
Z4-15Apr16-4E - 3	2.2	0.044	0.1988	0.0033	0.33074	5.03018	0.083499	0.0806	0.0012	1180.5	14	1169	18	1210	31	1210	31	0.00983747	0.0256198	0.481
Z4-15Apr16-4E - 4	0.312	0.018	0.04415	0.00094	0.1953	22.6501	0.482244	0.0512	0.003	275	14	278.5	5.8	250	130	278.5	5.8	-0.0125673	0.0208259	0.589354
Z4-15Apr16-4E - 5	1.9	0.084	0.184	0.0057	0.77117	5.43478	0.16836	0.0742	0.0022	1080	30	1089	31	1060	65	1060	65	-0.00826446	0.0613208	0.211636
Z4-15Apr16-4E - 6	0.321	0.016	0.04577	0.00082	0.22876	21.8484	0.391428	0.0507	0.0024	282	12	288.5	5.1	230	100	288.5	5.1	-0.0225303	0.0176776	0.732759
Z4-15Apr16-4E - 7	2.24	0.043	0.2019	0.0033	0.45498	4.95295	0.0809546	0.08035	0.0012	1193.3	13	1185.7	18	1204	29	1204	29	0.00640972	0.0240864	0.941958
Z4-15Apr16-4E - 8	0.334	0.011	0.04538	0.00096	0.41608	22.0361	0.466168	0.0535	0.0017	292.2	8.5	286.1	5.9	339	71	286.1	5.9	0.0213212	0.0206222	0.825397
Z4-15Apr16-4E - 9	0.2972	0.0091	0.04163	0.0007	0.2512	24.0211	0.403911	0.0514	0.0015	264	7.1	262.9	4.3	272	69	262.9	4.3	0.0041841	0.016356	0.325094
Zo03-2-15Apr16-4E - 1	0.3441	0.0087	0.04712	0.00074	0.27549	21.2224	0.333289	0.0531	0.0011	300.2	6.6	296.8	4.5	330	45	296.8	4.5	0.0114555	0.0151617	0.738292
Zo03-2-15Apr16-4E - 10	0.32	0.012	0.04434	0.00059	0.4225	22.553	0.300096	0.0526	0.0018	281.3	8.9	279.6	3.7	300	76	279.6	3.7	0.00608011	0.0132332	0.562963
Zo03-2-15Apr16-4E - 100	2.122	0.033	0.1943	0.0023	0.073115	5.14668	0.0609231	0.07896	0.00092	1155.7	11	1144.8	13	1170	23	1170	23	0.00952131	0.0196581	0.254688
Zo03-2-15Apr16-4E - 101	0.3192	0.007	0.04383	0.00076	0.58993	22.8154	0.395613	0.0529	0.00091	281.2	5.4	276.5	4.7	323	39	276.5	4.7	0.0169982	0.0169982	0.207427
Zo03-2-15Apr16-4E - 102	0.3033	0.0069	0.04197	0.00055	0.15416	23.8265	0.312237	0.0525	0.0011	268.9	5.4	265.1	3.4	310	51	265.1	3.4	0.0143342	0.0128253	0.708791
Zo03-2-15Apr16-4E - 103	1.787	0.037	0.1747	0.0022	0.54807	5.7241	0.0720837	0.074	0.0011	1040	13	1038.1	12	1038	30	1038	30	0.00183027	0.0289017	0.383014
Zo03-2-15Apr16-4E - 104	2.117	0.037	0.1946	0.0026	0.70195	5.13875	0.0686575	0.07916	0.00073	1155.7	11	1146	14	1175	18	1175	18	0.00846422	0.0153191	0.409272
Zo03-2-15Apr16-4E - 105	0.3254	0.0074	0.04534	0.00066	0.43604	22.0556	0.321056	0.05169	0.00091	285.9	5.7	285.9	4.1	267	41	285.9	4.1	0	0.0143407	0.535755
Zo03-2-15Apr16-4E - 106	0.3342	0.01	0.04647	0.00065	0.10199	21.5193	0.301001	0.0522	0.0015	292.5	7.9	292.8	4	282	66	292.8	4	-0.00102459	0.0136612	0.46873
Zo03-2-15Apr16-4E - 107	2.032	0.037	0.1891	0.0028	0.49876	5.28821	0.0783024	0.0779	0.0012	1128	13	1116	15	1146	31	1146	31	0.0107527	0.0270506	0.198399
Zo03-2-15Apr16-4E - 108	1.858	0.047	0.1786	0.0034	0.78537	5.5991	0.10659	0.0753	0.001	1066	17	1059	19	1074	27	1074	27	0.00661001	0.0251397	0.518578
Zo03-2-15Apr16-4E - 109	1.874	0.044	0.1786	0.0023	0.37965	5.5991	0.0721049	0.076	0.0014	1071	16	1059.1	13	1093	37	1093	37	0.011236	0.0338518	0.613103
Zo03-2-15Apr16-4E - 11	2.198	0.05	0.1977	0.0029	0.44207	5.05817	0.0741967	0.0811	0.0012	1180	16	1163	16	1222	28	1222	28	0.0146174	0.0229133	0.375969
Zo03-2-15Apr16-4E - 110	0.3129	0.0085	0.04367	0.00056	0.26553	22.899	0.293644	0.0515	0.0013	276.3	6.6	275.5	3.5	255	58	275.5	3.5	0.00290381	0.0127042	0.68773
Zo03-2-15Apr16-4E - 111	0.3241	0.0073	0.04548	0.00062	0.17111	21.9877	0.299744	0.0517	0.0011	284.9	5.6	286.7	3.8	267	48	286.7	3.8	-0.00627834	0.0132543	0.66893
Zo03-2-15Apr16-4E - 113	0.331	0.011	0.04508	0.0007	0.15745	22.1828	0.344453	0.053	0.0016	289.9	8.4	284.2	4.3	322	71	284.2	4.3	0.0200563	0.0151302	0.52705
Zo03-2-15Apr16-4E - 114	2.229	0.048	0.1976	0.0042	0.39733	5.06073	0.107566	0.0823	0.0017	1190	15	1162	22	1250	40	1250	40	0.0240964	0.032	0.668246
Zo03-2-15Apr16-4E - 115	1.699	0.067	0.1694	0.0066	0.98077	5.90319	0.229994	0.07247	0.00053	1006	24	1008	36	1002	16	1002	16	-0.00198413	0.0159681	0.40257
Zo03-2-15Apr16-4E - 117	0.319	0.018	0.04434	0.00085	0.63669	22.553	0.432342	0.0521	0.0024	281	14	279.6	5.3	280	100	279.6	5.3	0.00500715	0.0189557	0.443445
Zo03-2-15Apr16-4E - 118	0.381	0.019	0.0506	0.0019	0.93353	19.7628	0.742083	0.05431	0.00085	327	14	318	11	390	38	318	11	0.0283019	0.0345912	0.0627119
Zo03-2-15Apr16-4E - 119	0.3124	0.0083	0.04311	0.00061	0.17879	23.1965	0.328227	0.0521	0.0012	275.9	6.4	272.1	3.8	295	48	272.1	3.8	0.0139655	0.0139655	1.02395
Zo03-2-15Apr16-4E - 12	0.323	0.014	0.04451	0.0008	0.22539	22.4669	0.403808	0.0526	0.0022	284	11	280.7	4.9	302	94	280.7	4.9	0.0117563	0.0174564	0.642978
Zo03-2-15Apr16-4E - 121	1.792	0.03	0.1721	0.0022	0.55656	5.81058	0.0742781	0.07607	0.00098	1042.2	11	1023.4	12	1096	26	1096	26	0.0183701	0.0237226	0.133882
Zo03-2-15Apr16-4E - 122	0.3166	0.0092	0.04427	0.00087	0.60984	22.5887	0.443915	0.0516	0.0011	280.6	6.6	279.2	5.4	273	51	279.2	5.4	0.00501433	0.019341	0.385447
Zo03-2-15Apr16-4E - 123	0.3762	0.009	0.05148	0.00098	0.81835	19.425	0.369785	0.05266	0.00061	324.1	6.7	323.6	6	312	26	323.6	6	0.00154512	0.0185414	0.160648
Zo03-2-15Apr16-4E - 125	2.147	0.039	0.1963	0.0025	0.46407	5.09424	0.0648783	0.07917	0.00099	1167.4	12	1155.2	13	1184	25	1184	25	0.0105609	0.0211149	0.0908451
Zo03-2-15Apr16-4E - 126	0.1802	0.0057	0.02611	0.00037	0.13687	38.2995	0.542735	0.0501	0.0015	168.2	4.9	166.2	2.3	222	75	166.2	2.3	0.0120337	0.0138387	0.557927
Zo03-2-15Apr16-4E - 127	0.1557	0.0053	0.02366	0.00045	0.17579	42.2654	0.803865	0.048	0.0017	146.9	4.7	150.8	2.8	81	82	150.8	2.8	-0.0258621	0.0185676	0.944631
Zo03-2-15Apr16-4E - 128	0.3125	0.0088	0.04426	0.00068	0.51949	22.5938	0.347125	0.0514	0.0011	276	6.8	279.1	4.2	251	49	279.1	4.2	-0.0111071	0.0150484	0.681574
Zo03-2-15Apr16-4E - 129	0.309	0.0082	0.04347	0.00065	0.063116	23.0044	0.343981	0.0513	0.0014	273.2	6.3	274.3	4	248	59	274.3	4	-0.00401021	0.0145826	0.694444
Zo03-2-15Apr16-4E - 13	0.322	0.011	0.04455	0.00061	0.1406	22.4467	0.307351	0.0525	0.0016	284.5	8.7	280.9	3.7	297	68	280.9	3.7	0.0128159	0.0131719	0.618048
Zo03-2-15Apr16-4E - 130	0.3158	0.0074	0.04397	0.00059	0.3635	22.7428	0.305168	0.052	0.0011	278.6	5.7	277.4	3.6	289	45	277.4	3.6	0.00432588	0.0129776	0.730964
Zo03-2-15Apr16-4E - 132	0.3116	0.01	0.0426	0.00068	0.19506	23.4742	0.374705	0.0529	0.0016	275.3	7.8	268.9	4.2	332	70	268.9	4.2	0.0238007	0.0156192	0.378613
Zo03-2-15Apr16-4E - 133	0.2688	0.0074	0.03741	0.0008	0.36643	26.7308	0.571629	0.0515	0.0013	241.7	5.9	236.7	5	258	57	236.7	5	0.0211238	0.0211238	0.276619
Zo03-2-15Apr16-4E - 134	1.554	0.041	0.1533	0.0023	0.61782	6.52316	0.0978686	0.0738	0.0013	952	16	919	13	1033	37	1033	37	0.0359086	0.035818	0.522539
Zo03-2-15Apr16-4E - 135	0.3284	0.0089	0.04506	0.00057	0.13536	22.1926	0.280732	0.053	0.0014	288.1	6.8	284.1	3.5	318	59	284.1	3.5	0.0140795	0.0123196	0.597884
Zo03-2-15Apr16-4E - 136	0.313	0.012	0.04432	0.00094	0.25558	22.5632	0.478551	0.0515	0.0021	277.5	9.1	279.5	5.8	251	89	279.5	5.8	-0.00715564	0.0207513	0.619101
Zo03-2-15Apr16-4E - 137	0.3065	0.0092	0.04371	0.0006	0.39788	22.8781	0.314043	0.0515	0.0014	271.3	7.1	275.8	3.7	253	62	275.8	3.7	-0.0163162	0.0134155	0.703165
Zo03-2-15Apr16-4E - 138	0.3026	0.0086	0.04166	0.00079	0.36718	24.0038	0.455186	0.0531	0.0011	268.3	6.7	263.1	4.9	330	47	263.1	4.9	0.0197643	0.0186241	0.516129
Zo03-2-15Apr16-4E - 139	1.617	0.025	0.1599	0.002	0.52288	6.25391	0.0782227	0.07355	0.00066	976.7	9.6	956.4	11	1028	18	1028	18	0.0212254	0.0175097	0.200658
Zo03-2-15Apr16-4E - 14	1.864	0.051	0.178	0.0026	0.23285	5.61798	0.0820603	0.0768	0.0017	1068	18	1056	14	1115	43	1115	43	0.0113636	0.038565	0.339257
Zo03-2-15Apr16-4E - 140	0.3164	0.0074	0.04447	0.00059	0.30001	22.4871	0.298344	0.05148	0.0008	279.1	5.7	280.5	3.6	274	44	280.5	3.6	-0.00499109	0.0128342	0.542613
Zo03-2-15Apr16-4E - 141	0.3466	0.0074	0.04811	0.0009	0.83714	20.7857	0.388841	0.05297	0.00089	302.2	5.6	302.9	5.5	326	38	302.9	5.5	-0.00231099	0.0181578	0.0991727
Zo03-2-15Apr16-4E - 142	2.09	0.047	0.1927	0.0035	0.6636	5.18941	0.094255	0.0786	0.001	1145	15	1136	19	1160	26	1160	26	0.00792254	0.0224138	0.427044
Zo03-2-15Apr16-4E - 143	0.3123	0.009	0.04373	0.00061	0.068436	22.8676	0.318985	0.0522	0.0014	276.9	7.2	275.9	3.8	285	60	275.9	3.8	0.0036245	0.0137731	0.737833
Zo03-2-15Apr16-4E - 144	0.3203	0.0094	0.04467	0.00055	0.40352	22.3864	0.275633	0.0518	0.0012	281.9	7.2	281.7	3.4	269	53	281.7	3.4	0.000709975	0.0120696	0.977011
Zo03-2-15Apr16-4E - 145	0.2966	0.0066	0.04152	0.00052	0.44809	24.0848	0.30164	0.05189	0.00089	263.6	5.2	262.3	3.2	277	39	262.3	3.2	0.00495616	0.0121998	0.876866
Zo03-2-15Apr16-4E - 147	0.316	0.008	0.04428	0.00063	0.2789	22.5836	0.321311	0.0513	0.0013	278.7	6.2	279.3	3.9	249	56	279.3	3.9	-0.00214823	0.0139635	0.633067
Zo03-2-15Apr16-4E - 148	1.77	0.032	0.172	0.003	0.21821	5.81395	0.101406	0.0745	0.0012	1034.4	12	1023	17	1053	33	1053	33	0.0111437	0.031339	0.591819
Zo03-2-15Apr16-4E - 149	0.3252	0.0087	0.04499	0.00062	0.2622	22.2272	0.306309	0.0524	0.0013	285.7	6.7	283.7	3.8	306	57	283.7	3.8	0.0070497	0.0133944	0.847458
Zo03-2-15Apr16-4E - 15	0.3211	0.0073	0.04397	0.00051	0.054989	22.7428	0.263789	0.0531	0.0012	282.6	5.6	277.4	3.1	336	49	277.4	3.1	0.0187455	0.0111752	0.712949
Zo03-2-15Apr16-4E - 150	0.261	0.012	0.03603	0.00056	0.58498	27.7546	0.43138	0.0534	0.0019	235.4	9.6	228.2	3.5	361	90	228.2	3.5	0.0315513	0.0153374	0.723898
Zo03-2-15Apr16-4E - 151	1.984	0.042	0.1866	0.0031	0.77773	5.35906	0.0890304	0.07702	0.0009	1109	14	1103	17	1124	24	1124	24	0.00543971	0.0213523	0.361045
Zo03-2-15Apr16-4E - 152	1.703	0.038	0.166	0.0024	0.59325	6.0241	0.0870954	0.0738	0.0011	1009	14	990	13	1033	31	1033	31	0.0191919	0.0300097	0.352381
Zo03-2-15Apr16-4E - 153	0.3195	0.0085	0.04371	0.00068	0.26417	22.8781	0.355916	0.0528	0.0013	282.4	6.3	275.8	4.2	311	55	275.8	4.2	0.0239304	0.0152284	1.56701
Zo03-2-15Apr16-4E - 154	0.3309	0.0096	0.04513	0.00065	-0.1795	22.1582	0.319141	0.0526	0.0016	290	7.3	284.5	4	332	78	284.5	4	0.0193322	0.0140598	0.484244
Zo03-2-15Apr16-4E - 156	0.3168	0.0084	0.04287	0.00066	0.34657	23.3263	0.359118	0.0533	0.0012	279.3	6.5	270.6	4.1	334	52	270.6	4.1	0.0321508	0.0151515	0.672932
Zo03-2-15Apr16-4E - 157	0.3172	0.0088	0.04395	0.00062	0.37788	22.7531	0.320977	0.0523	0.0012	281.9	6.1	277.3	3.8	289	52	277.3	3.8	0.0165885	0.0137036	0.846715
Zo03-2-15Apr16-4E - 159	0.3071	0.0083	0.04271	0.00066	0.22083	23.4137	0.361814	0.0527	0.0012	272.9	6.8	269.6	4.1	308	53	269.6	4.1	0.0122404	0.0152077	0.387574
Zo03-2-15Apr16-4E - 16	0.3671	0.0082	0.04994	0.001	0.63925	20.024	0.400962	0.05289	0.00067	317.4	6.1	314.2	6.2	323	29	314.2	6.2	0.0101846	0.0197327	0.313953
Zo03-2-15Apr16-4E - 160	1.676	0.029	0.1655	0.003	0.40571	6.0423	0.109528	0.0733	0.0011	999.4	11	987	16	1027	32	1027	32	0.0125633	0.0311587	0.404678
Zo03-2-15Apr16-4E - 163	1.945	0.033	0.1838	0.0021	0.19801	5.4407	0.0621625	0.0769	0.001	1096.6	12	1087.5	12	1121	26	1121	26	0.00836782	0.0231936	0.650181
Zo03-2-15Apr16-4E - 165	0.3531	0.0097	0.04791	0.00062	0.4081	20.8725	0.270109	0.0537	0.0013	306.9	7.2	301.7	3.8	351	52	301.7	3.8	0.0172357	0.0125953	0.810244
Zo03-2-15Apr16-4E - 166	0.333	0.0098	0.0467	0.0011	0.87059	21.4133	0.504381	0.05174	0.00073	291.6	7.5	294.3	6.9	271	32	294.3	6.9	-0.00917431	0.0234455	0.718837
Zo03-2-15Apr16-4E - 167	0.3131	0.01	0.0446	0.00075	0.014388	22.4215	0.377044	0.0508	0.0019	276.3	8	281.3	4.7	221	80	281.3	4.7	-0.0177746	0.0167081	0.519112
Zo03-2-15Apr16-4E - 168	2.084	0.037	0.1901	0.0021	0.40894	5.26039	0.0581106	0.07934	0.00089	1144.9	12	1122.1	11	1179	22	1179	22	0.020319	0.0186599	0.594164
Zo03-2-15Apr16-4E - 169	2.059	0.031	0.1914	0.0023	0.36509	5.22466	0.0627833	0.07788	0.00071	1134.9	10	1128.9	12	1146	19	1146	19	0.00531491	0.0165794	0.292991
Zo03-2-15Apr16-4E - 17	0.322	0.012	0.04468	0.00064	0.2239	22.3814	0.320593	0.0527	0.0018	283.1	9.2	281.7	3.9	304	76	281.7	3.9	0.00496983	0.0138445	0.559722
Zo03-2-15Apr16-4E - 170	0.3119	0.0097	0.04351	0.00082	0.42905	22.9832	0.433147	0.0524	0.0015	275.5	7.5	274.6	5	296	65	274.6	5	0.00327749	0.0182083	0.570629
Zo03-2-15Apr16-4E - 171	0.3417	0.0082	0.04795	0.001	0.85263	20.8551	0.434933	0.0513	0.00064	298.3	6.2	301.9	6.1	252	29	301.9	6.1	-0.0119245	0.0202054	0.524257
Zo03-2-15Apr16-4E - 172	1.722	0.038	0.1736	0.0033	0.94416	5.76037	0.1095	0.07188	0.00051	1016	14	1032	18	987	16	987	16	-0.0155039	0.0162107	0.181883
Zo03-2-15Apr16-4E - 173	2.131	0.037	0.1924	0.0025	0.68392	5.19751	0.0675352	0.07999	0.00079	1158.6	12	1134.5	13	1196	20	1196	20	0.0212428	0.0167224	0.342366
Zo03-2-15Apr16-4E - 174	0.3165	0.0087	0.04409	0.00054	-0.009156	22.6809	0.277788	0.0519	0.0013	279	6.7	278.1	3.3	283	60	278.1	3.3	0.00323625	0.0118662	0.78453
Zo03-2-15Apr16-4E - 175	0.318	0.0084	0.04427	0.00067	0.16548	22.5887	0.341866	0.0521	0.0013	280.2	6.5	279.2	4.1	283	56	279.2	4.1	0.00358166	0.0146848	0.695015
Zo03-2-15Apr16-4E - 177	0.3155	0.0087	0.04419	0.00058	0.23204	22.6296	0.297016	0.0523	0.0014	278.3	6.7	278.7	3.6	298	63	278.7	3.6	-0.00143524	0.0129171	0.666891
Zo03-2-15Apr16-4E - 178	0.3259	0.0084	0.04501	0.00067	0.40923	22.2173	0.330717	0.0525	0.0012	286.3	6.4	283.8	4.1	301	51	283.8	4.1	0.00880902	0.0144468	0.748344
Zo03-2-15Apr16-4E - 179	0.37	0.015	0.0521	0.0012	0.61711	19.1939	0.442085	0.051	0.0015	320	11	327.1	7.1	247	73	327.1	7.1	-0.0217059	0.0217059	0.346452
Zo03-2-15Apr16-4E - 18	1.682	0.065	0.1688	0.0024	0.49664	5.92417	0.0842299	0.0722	0.0021	1003	24	1005	14	992	64	992	64	-0.00199005	0.0645161	0.470611
Zo03-2-15Apr16-4E - 180	0.312	0.012	0.04256	0.00059	0.45783	23.4962	0.325723	0.0533	0.0017	275.6	9.6	268.7	3.7	332	71	268.7	3.7	0.0256792	0.01377	0.858867
Zo03-2-15Apr16-4E - 181	2.24	0.037	0.203	0.0028	0.60506	4.92611	0.0679463	0.08028	0.00074	1193.5	12	1191	15	1207	17	1207	17	0.00209908	0.0140845	0.431328
Zo03-2-15Apr16-4E - 182	2.125	0.042	0.1945	0.0032	0.39892	5.14139	0.0845884	0.0791	0.0013	1159	14	1146	17	1173	33	1173	33	0.0113438	0.028133	0.50835
Zo03-2-15Apr16-4E - 183	0.31	0.0062	0.04298	0.00057	0.50198	23.2666	0.308562	0.05232	0.00067	274.1	4.8	271.3	3.5	303	31	271.3	3.5	0.0103207	0.0129008	0.744828
Zo03-2-15Apr16-4E - 184	1.666	0.032	0.1648	0.0021	0.53227	6.06796	0.0773223	0.0728	0.001	995.3	12	983.3	12	1008	29	1008	29	0.0122038	0.0287698	0.147069
Zo03-2-15Apr16-4E - 185	0.303	0.013	0.0435	0.00074	0.41373	22.9885	0.391069	0.0507	0.0019	268	10	274.5	4.5	221	85	274.5	4.5	-0.0236794	0.0163934	0.69791
Zo03-2-15Apr16-4E - 186	0.2832	0.0095	0.03934	0.00069	0.44467	25.4194	0.445841	0.0525	0.0016	253.1	7.5	248.7	4.3	330	66	248.7	4.3	0.017692	0.0172899	0.45829
Zo03-2-15Apr16-4E - 187	1.863	0.03	0.1793	0.0025	0.32873	5.57724	0.0777642	0.076	0.0013	1068	11	1063	14	1093	33	1093	33	0.00470367	0.0301921	0.302367
Zo03-2-15Apr16-4E - 188	0.3551	0.01	0.04848	0.00071	0.31895	20.6271	0.302088	0.0534	0.0014	308.4	7.9	305.2	4.4	342	59	305.2	4.4	0.0104849	0.0144168	0.821317
Zo03-2-15Apr16-4E - 189	0.312	0.011	0.04292	0.00076	0.30053	23.2992	0.412567	0.0522	0.0016	275.8	8.7	270.9	4.7	301	75	270.9	4.7	0.0180879	0.0173496	0.666287
Zo03-2-15Apr16-4E - 19	1.66	0.037	0.1654	0.0021	0.28507	6.04595	0.0767624	0.0731	0.0014	993	14	986.9	12	1013	38	1013	38	0.00618097	0.0375123	0.124148
Zo03-2-15Apr16-4E - 190	0.3121	0.0069	0.04194	0.00063	0.27295	23.8436	0.358165	0.05415	0.00093	275.7	5.3	264.9	3.9	382	41	264.9	3.9	0.0407701	0.0147225	0.458792
Zo03-2-15Apr16-4E - 191	0.3083	0.0083	0.04388	0.0006	0.0078982	22.7894	0.311615	0.051	0.0013	272.7	6.4	276.8	3.7	236	58	276.8	3.7	-0.0148121	0.0133671	0.580034
Zo03-2-15Apr16-4E - 192	0.3142	0.0087	0.04475	0.00067	0.27026	22.3464	0.334571	0.051	0.0011	277.3	6.7	282.2	4.1	234	52	282.2	4.1	-0.0173636	0.0145287	0.700331
Zo03-2-15Apr16-4E - 193	0.3133	0.0086	0.04313	0.00076	0.69895	23.1857	0.408559	0.05321	0.00091	276.6	6.6	272.2	4.7	342	36	272.2	4.7	0.0161646	0.0172667	0.870134
Zo03-2-15Apr16-4E - 195	2.023	0.047	0.1892	0.0036	0.87972	5.28541	0.100568	0.07765	0.00071	1122	16	1117	20	1137	18	1137	18	0.00447628	0.0158311	0.594697
Zo03-2-15Apr16-4E - 196	0.317	0.011	0.04406	0.00066	0.32723	22.6963	0.339981	0.052	0.0015	279.2	8.6	278	4.1	291	66	278	4.1	0.00431655	0.0147482	0.602797
Zo03-2-15Apr16-4E - 197	0.3131	0.007	0.04337	0.00054	0.3805	23.0574	0.287088	0.05223	0.00095	277.3	5.6	273.7	3.4	298	43	273.7	3.4	0.0131531	0.0124224	0.313778
Zo03-2-15Apr16-4E - 198	0.3214	0.0093	0.04422	0.00067	0.12665	22.6142	0.342639	0.0524	0.0015	282.8	7.2	278.9	4.1	294	67	278.9	4.1	0.0139835	0.0147006	0.567647
Zo03-2-15Apr16-4E - 199	0.3176	0.0088	0.04305	0.00063	0.36542	23.2288	0.339934	0.0535	0.0012	279.9	6.8	271.7	3.9	341	52	271.7	3.9	0.0301803	0.0143541	0.620321
Zo03-2-15Apr16-4E - 2	0.3105	0.008	0.04317	0.0006	0.18482	23.1642	0.321949	0.052	0.0013	274.5	6.2	272.5	3.7	277	54	272.5	3.7	0.00733945	0.013578	1.0288
Zo03-2-15Apr16-4E - 20	0.312	0.011	0.04332	0.00066	0.42783	23.084	0.351696	0.0518	0.0015	275.4	8.5	273.4	4.1	266	65	273.4	4.1	0.00731529	0.0149963	0.738547
Zo03-2-15Apr16-4E - 200	0.3758	0.0087	0.0527	0.0012	0.85023	18.9753	0.432076	0.05207	0.00058	323.8	6.4	330.9	7.1	287	26	330.9	7.1	-0.0214566	0.0214566	0.744957
Zo03-2-15Apr16-4E - 202	2.137	0.059	0.1992	0.0039	0.63693	5.02008	0.0982847	0.0785	0.0018	1160	19	1171	21	1157	45	1157	45	-0.00939368	0.0388937	0.497326
Zo03-2-15Apr16-4E - 204	0.324	0.014	0.04446	0.0008	0.5934	22.4921	0.404717	0.0527	0.0018	284	11	280.4	5	308	79	280.4	5	0.0128388	0.0178317	0.791411
Zo03-2-15Apr16-4E - 205	2.123	0.036	0.196	0.0025	0.50281	5.10204	0.0650771	0.07839	0.00076	1155.9	12	1153.6	13	1156	19	1156	19	0.00199376	0.016436	0.392029
Zo03-2-15Apr16-4E - 206	1.609	0.025	0.1607	0.0021	0.35483	6.22278	0.0813182	0.07245	0.00082	973.4	9.7	960.9	12	997	23	997	23	0.0130086	0.0230692	0.140702
Zo03-2-15Apr16-4E - 207	2.305	0.057	0.2137	0.0048	0.92587	4.67946	0.105107	0.07793	0.00064	1216	18	1248	26	1145	16	1145	16	-0.025641	0.0139738	0.329002
Zo03-2-15Apr16-4E - 209	2.102	0.046	0.1932	0.0025	0.32014	5.17598	0.066977	0.0785	0.0015	1149	15	1138.8	14	1163	36	1163	36	0.0089568	0.0309544	0.486486
Zo03-2-15Apr16-4E - 21	0.3307	0.0094	0.0457	0.00082	0.65867	21.8818	0.392628	0.0525	0.0011	290	7.2	288	5.1	319	43	288	5.1	0.00694444	0.0177083	0.727273
Zo03-2-15Apr16-4E - 211	0.3128	0.008	0.04378	0.00053	0.25657	22.8415	0.276519	0.0523	0.001	276.2	6.2	276.2	3.3	291	46	276.2	3.3	0	0.0119479	0.783708
Zo03-2-15Apr16-4E - 212	0.3173	0.0087	0.04373	0.00061	0.072027	22.8676	0.318985	0.0521	0.0015	279.7	6.8	275.9	3.8	301	63	275.9	3.8	0.0137731	0.0137731	0.618234
Zo03-2-15Apr16-4E - 213	0.3454	0.008	0.04763	0.0011	0.86441	20.9952	0.484877	0.05222	0.00062	301.2	6	301	6.8	293	27	301	6.8	0.000664452	0.0225914	0.766071
Zo03-2-15Apr16-4E - 214	0.3194	0.01	0.04446	0.00081	0.58661	22.4921	0.409776	0.0523	0.0012	281.2	8	280.4	5	292	53	280.4	5	0.00285307	0.0178317	0.831354
Zo03-2-15Apr16-4E - 215	0.315	0.011	0.04303	0.00059	0.45445	23.2396	0.318647	0.0525	0.0013	278	8.2	271.6	3.7	304	54	271.6	3.7	0.0235641	0.013623	0.832636
Zo03-2-15Apr16-4E - 216	2.008	0.039	0.1888	0.0025	0.62033	5.29661	0.0701352	0.07756	0.00093	1118	13	1114.8	14	1134	24	1134	24	0.00287047	0.021164	0.619979
Zo03-2-15Apr16-4E - 218	0.342	0.013	0.04859	0.00092	0.24055	20.5804	0.389667	0.0511	0.0016	298.7	10	305.9	5.7	237	73	305.9	5.7	-0.0235371	0.0186335	0.84629
Zo03-2-15Apr16-4E - 219	0.3037	0.0093	0.0429	0.00094	0.58689	23.31	0.510756	0.0521	0.0012	269.2	7.3	270.8	5.8	282	54	270.8	5.8	-0.00590842	0.021418	0.406716
Zo03-2-15Apr16-4E - 22	0.3161	0.01	0.04376	0.0006	-0.094293	22.8519	0.313326	0.0524	0.0017	278.7	7.8	276.1	3.7	292	73	276.1	3.7	0.00941688	0.0134009	0.801325
Zo03-2-15Apr16-4E - 220	1.837	0.031	0.1748	0.0024	0.64201	5.72082	0.0785468	0.07643	0.0007	1058.5	11	1040.4	13	1105	18	1105	18	0.0173972	0.0162896	0.842727
Zo03-2-15Apr16-4E - 222	0.3113	0.0092	0.0443	0.00062	0.11758	22.5734	0.315925	0.0507	0.0015	275	7.1	279.4	3.9	219	68	279.4	3.9	-0.015748	0.0139585	0.609225
Zo03-2-15Apr16-4E - 223	0.3197	0.01	0.04396	0.00088	0.6943	22.748	0.455373	0.0527	0.0014	281.5	7.7	277.3	5.4	310	59	277.3	5.4	0.0151461	0.0194735	0.700798
Zo03-2-15Apr16-4E - 224	0.3152	0.0091	0.04348	0.00061	0.20275	22.9991	0.322664	0.0525	0.0014	278.1	7.1	274.4	3.8	300	61	274.4	3.8	0.013484	0.0138484	0.548472
Zo03-2-15Apr16-4E - 225	0.309	0.0076	0.04129	0.00061	0.34243	24.2189	0.3578	0.0533	0.0011	273.3	5.9	260.8	3.8	336	49	260.8	3.8	0.0479294	0.0145706	0.523498
Zo03-2-15Apr16-4E - 226	2.364	0.041	0.2093	0.0028	0.5933	4.77783	0.0639175	0.08213	0.00089	1231.3	12	1225	15	1252	20	1252	20	0.00514286	0.0159744	0.597837
Zo03-2-15Apr16-4E - 227	2.031	0.038	0.1865	0.0025	0.81529	5.36193	0.0718757	0.07903	0.00068	1125.5	13	1102.5	13	1172	17	1172	17	0.0208617	0.0145051	0.589612
Zo03-2-15Apr16-4E - 228	2.038	0.038	0.1914	0.0028	0.61759	5.22466	0.0764318	0.077	0.001	1128	13	1129	15	1123	28	1123	28	-0.00088574	0.0249332	0.286503
Zo03-2-15Apr16-4E - 229	0.3147	0.0095	0.04412	0.00059	0.35905	22.6655	0.303097	0.0518	0.0014	277.7	7.3	278.3	3.7	268	60	278.3	3.7	-0.00215595	0.013295	0.588068
Zo03-2-15Apr16-4E - 23	0.3122	0.0094	0.04416	0.00065	0.1711	22.6449	0.333315	0.0511	0.0014	275.7	7.3	278.6	4	237	63	278.6	4	-0.0104092	0.0143575	0.579545
Zo03-2-15Apr16-4E - 230	0.324	0.0091	0.04324	0.00064	0.22449	23.1267	0.342301	0.0542	0.0014	284.8	7	272.9	3.9	372	59	272.9	3.9	0.0436057	0.0142909	0.638247
Zo03-2-15Apr16-4E - 231	0.303	0.015	0.04188	0.001	0.60467	23.8777	0.570147	0.0528	0.0017	271	11	264.4	6.4	314	72	264.4	6.4	0.0249622	0.0242057	0.576687
Zo03-2-15Apr16-4E - 232	0.3046	0.0094	0.04339	0.00059	0.27716	23.0468	0.313381	0.0513	0.0013	269.8	7.3	273.8	3.7	248	59	273.8	3.7	-0.0146092	0.0135135	0.895394
Zo03-2-15Apr16-4E - 233	2.072	0.04	0.196	0.0032	0.7453	5.10204	0.0832986	0.07706	0.00071	1140	13	1154	17	1122	18	1122	18	-0.0121317	0.0160428	0.372754
Zo03-2-15Apr16-4E - 234	1.898	0.041	0.1787	0.0033	0.43135	5.59597	0.103339	0.0782	0.0012	1084	16	1060	18	1151	29	1151	29	0.0226415	0.0251955	0.413007
Zo03-2-15Apr16-4E - 235	0.306	0.012	0.04298	0.00066	0.2703	23.2666	0.357282	0.0521	0.0018	272.4	9.2	271.2	4.1	266	81	271.2	4.1	0.00442478	0.015118	0.546053
Zo03-2-15Apr16-4E - 236	0.3153	0.0075	0.04377	0.00058	0.11735	22.8467	0.302744	0.052	0.0012	278.1	5.8	276.1	3.6	279	54	276.1	3.6	0.00724375	0.0130388	0.675127
Zo03-2-15Apr16-4E - 237	0.3109	0.0086	0.04285	0.00072	0.28929	23.3372	0.392131	0.0528	0.0014	274.8	6.7	270.5	4.4	310	60	270.5	4.4	0.0158965	0.0162662	0.602273
Zo03-2-15Apr16-4E - 238	0.321	0.012	0.04319	0.00069	-0.17159	23.1535	0.369899	0.0544	0.0024	282.1	9.4	272.6	4.3	367	99	272.6	4.3	0.0348496	0.015774	0.725352
Zo03-2-15Apr16-4E - 239	0.3129	0.0075	0.04348	0.00062	0.36692	22.9991	0.327954	0.0524	0.0011	276.3	5.8	274.3	3.9	296	46	274.3	3.9	0.00729129	0.014218	0.604818
Zo03-2-15Apr16-4E - 24	0.3152	0.0092	0.04351	0.00062	-0.30544	22.9832	0.327502	0.0525	0.0014	278	7.1	274.6	3.8	299	61	274.6	3.8	0.0123816	0.0138383	0.86682
Zo03-2-15Apr16-4E - 240	0.3108	0.0085	0.04288	0.00057	-0.27504	23.3209	0.310003	0.0522	0.0013	276.1	6	270.7	3.5	290	56	270.7	3.5	0.0199483	0.0129294	0.704138
Zo03-2-15Apr16-4E - 241	0.173	0.0055	0.02575	0.00035	0.14577	38.835	0.527854	0.0488	0.0015	162	4.8	163.9	2.2	139	66	163.9	2.2	-0.0115924	0.0134228	0.440994
Zo03-2-15Apr16-4E - 242	2.084	0.043	0.1951	0.0035	0.78462	5.12558	0.0919504	0.07777	0.00081	1143	14	1149	19	1140	21	1140	21	-0.00522193	0.0184211	0.380134
Zo03-2-15Apr16-4E - 243	0.316	0.015	0.04321	0.00085	0.14159	23.1428	0.45525	0.0531	0.0023	281	11	272.7	5.3	343	90	272.7	5.3	0.0304364	0.0194353	0.725806
Zo03-2-15Apr16-4E - 244	0.305	0.011	0.04173	0.00056	0.23029	23.9636	0.321582	0.053	0.0016	270.4	8.4	263.5	3.4	337	66	263.5	3.4	0.026186	0.0129032	0.48985
Zo03-2-15Apr16-4E - 245	2.161	0.041	0.1984	0.0028	0.80829	5.04032	0.0711336	0.07931	0.00063	1168	13	1167	15	1179	16	1179	16	0.000856898	0.0135708	0.297938
Zo03-2-15Apr16-4E - 246	2.413	0.051	0.2077	0.0032	0.89085	4.81464	0.0741783	0.08476	0.00064	1246	15	1216	17	1310	15	1310	15	0.0246711	0.0114504	0.512416
Zo03-2-15Apr16-4E - 247	2.086	0.034	0.1931	0.0025	0.47545	5.17866	0.0670464	0.0788	0.001	1144	11	1138	14	1165	26	1165	26	0.00527241	0.0223176	0.44359
Zo03-2-15Apr16-4E - 248	0.3098	0.0078	0.04348	0.00067	0.07483	22.9991	0.354402	0.0518	0.0012	273.9	6.1	274.4	4.1	282	54	274.4	4.1	-0.00182216	0.0149417	0.683957
Zo03-2-15Apr16-4E - 249	0.3145	0.0073	0.0435	0.00054	0.31236	22.9885	0.285375	0.0527	0.001	277.6	5.6	274.5	3.3	318	42	274.5	3.3	0.0112933	0.0120219	0.431361
Zo03-2-15Apr16-4E - 25	1.686	0.031	0.1683	0.002	0.18857	5.94177	0.0706093	0.07262	0.00097	1003	12	1002.6	11	1007	28	1007	28	0.000398963	0.0278054	0.472921
Zo03-2-15Apr16-4E - 250	0.33	0.012	0.04603	0.00075	0.35177	21.725	0.35398	0.052	0.0017	289.5	9.2	290.1	4.6	305	83	290.1	4.6	-0.00206825	0.0158566	0.656183
Zo03-2-15Apr16-4E - 251	0.327	0.014	0.04403	0.00094	0.39713	22.7118	0.484876	0.0539	0.0021	287	11	277.8	5.8	359	90	277.8	5.8	0.0331174	0.0208783	0.532602
Zo03-2-15Apr16-4E - 252	0.3104	0.0084	0.04224	0.00056	0.029337	23.6742	0.313863	0.0532	0.0013	274.4	6.5	266.7	3.4	335	57	266.7	3.4	0.0288714	0.0127484	1.09375
Zo03-2-15Apr16-4E - 253	1.928	0.028	0.1804	0.0023	0.66601	5.54324	0.0706732	0.07788	0.00057	1090.7	9.7	1069.2	13	1143	15	1143	15	0.0201085	0.0131234	0.409884
Zo03-2-15Apr16-4E - 254	1.491	0.024	0.1482	0.0022	0.26406	6.74764	0.100167	0.07253	0.00091	926.6	9.9	891	12	1000	26	1000	26	0.0399551	0.026	0.181422
Zo03-2-15Apr16-4E - 255	0.3177	0.0098	0.04374	0.00054	0.42777	22.8624	0.282251	0.0533	0.0013	279.9	7.6	276	3.3	336	54	276	3.3	0.0141304	0.0119565	0.700826
Zo03-2-15Apr16-4E - 256	1.79	0.034	0.1741	0.0023	0.5539	5.74383	0.0758805	0.07449	0.0009	1041.5	12	1034.4	13	1053	24	1053	24	0.00686388	0.022792	0.347432
Zo03-2-15Apr16-4E - 257	1.955	0.046	0.1833	0.0029	0.2441	5.45554	0.0863124	0.0775	0.0017	1099	16	1085	16	1129	45	1129	45	0.0129032	0.0398583	0.57291
Zo03-2-15Apr16-4E - 258	0.339	0.017	0.04544	0.00066	-0.0078178	22.007	0.319645	0.0538	0.0026	296	13	287	4.2	360	110	287	4.2	0.0313589	0.0146341	0.370044
Zo03-2-15Apr16-4E - 259	0.3282	0.009	0.04471	0.0005	0.3517	22.3664	0.250127	0.0525	0.0011	288	6.9	281.9	3.1	312	52	281.9	3.1	0.0216389	0.0109968	0.571645
Zo03-2-15Apr16-4E - 26	0.3082	0.0086	0.04283	0.0006	0.13171	23.3481	0.327081	0.0521	0.0014	272.6	6.7	270.4	3.7	290	61	270.4	3.7	0.00813609	0.0136834	0.899563
Zo03-2-15Apr16-4E - 260	0.318	0.011	0.04398	0.00058	0.44382	22.7376	0.299859	0.0529	0.0016	280.5	8.3	277.4	3.6	314	67	277.4	3.6	0.0111752	0.0129776	0.688196
Zo03-2-15Apr16-4E - 261	1.848	0.036	0.1793	0.0023	0.60464	5.57724	0.071543	0.07494	0.00096	1064	13	1063.3	13	1070	27	1070	27	0.000658328	0.0252336	0.208442
Zo03-2-15Apr16-4E - 262	1.539	0.034	0.1545	0.0024	0.53326	6.47249	0.100544	0.0724	0.0013	946	14	926	14	995	38	995	38	0.0215983	0.038191	0.29656
Zo03-2-15Apr16-4E - 263	0.347	0.012	0.04629	0.00073	0.20668	21.6029	0.340681	0.0542	0.0018	302.5	9.4	291.7	4.5	372	74	291.7	4.5	0.0370243	0.0154268	0.499494
Zo03-2-15Apr16-4E - 265	1.834	0.048	0.1778	0.0036	0.78806	5.6243	0.113878	0.07443	0.00098	1057	17	1055	20	1052	27	1052	27	0.00189573	0.0256654	0.479495
Zo03-2-15Apr16-4E - 266	2.042	0.057	0.1888	0.0028	0.13718	5.29661	0.0785514	0.0786	0.0021	1128	19	1115	15	1153	55	1153	55	0.0116592	0.0477016	0.564227
Zo03-2-15Apr16-4E - 267	0.32	0.012	0.04411	0.00062	0.12693	22.6706	0.318653	0.0525	0.0017	281.9	9	278.3	3.8	308	78	278.3	3.8	0.0129357	0.0136543	0.797101
Zo03-2-15Apr16-4E - 27	0.333	0.018	0.04409	0.00078	0.18343	22.6809	0.401249	0.0552	0.0031	292	14	278.1	4.8	390	120	278.1	4.8	0.049982	0.01726	0.655372
Zo03-2-15Apr16-4E - 28	2.06	0.062	0.1927	0.0032	0.49109	5.18941	0.086176	0.0781	0.0021	1140	22	1136	17	1158	50	1158	50	0.00352113	0.0431779	0.574041
Zo03-2-15Apr16-4E - 29	0.3223	0.0093	0.04425	0.00063	0.13413	22.5989	0.321747	0.0522	0.0014	283.6	7.2	279.1	3.9	288	63	279.1	3.9	0.0161233	0.0139735	0.572016
Zo03-2-15Apr16-4E - 3	1.66	0.029	0.1659	0.0025	0.59346	6.02773	0.0908337	0.07213	0.00079	995.4	12	989	14	989	22	989	22	0.00647118	0.0222447	0.544681
Zo03-2-15Apr16-4E - 30	0.3088	0.007	0.04301	0.0006	0.065431	23.2504	0.324349	0.0517	0.0012	273.2	5.4	271.5	3.7	278	58	271.5	3.7	0.00626151	0.013628	0.209643
Zo03-2-15Apr16-4E - 31	0.3216	0.0096	0.04446	0.00066	0.021911	22.4921	0.333891	0.0525	0.0017	283	7.3	280.4	4.1	324	77	280.4	4.1	0.00927247	0.014622	0.612729
Zo03-2-15Apr16-4E - 32	0.307	0.013	0.04132	0.00064	0.38351	24.2014	0.374852	0.0539	0.0022	272	10	261	4	354	92	261	4	0.0421456	0.0153257	0.525246
Zo03-2-15Apr16-4E - 33	0.317	0.016	0.04359	0.00061	0.11363	22.941	0.321038	0.0525	0.0026	279	13	275.1	3.8	300	110	275.1	3.8	0.0141767	0.0138132	0.504686
Zo03-2-15Apr16-4E - 34	2.088	0.04	0.1959	0.0027	0.68198	5.10465	0.070355	0.07818	0.00078	1144	13	1153	15	1150	20	1150	20	-0.00780572	0.0173913	1.4176
Zo03-2-15Apr16-4E - 35	0.3145	0.0077	0.04393	0.00054	0.34987	22.7635	0.279815	0.0515	0.0011	277.6	5.9	277.1	3.3	256	48	277.1	3.3	0.0018044	0.0119091	1.0939
Zo03-2-15Apr16-4E - 36	0.321	0.012	0.04413	0.00075	0.82708	22.6603	0.385118	0.0522	0.0014	282.3	8.9	278.4	4.7	290	60	278.4	4.7	0.0140086	0.0168822	0.789051
Zo03-2-15Apr16-4E - 37	1.892	0.043	0.1811	0.003	0.75166	5.52181	0.0914712	0.0759	0.0012	1078	15	1073	16	1092	33	1092	33	0.00465983	0.0302198	0.524804
Zo03-2-15Apr16-4E - 38	2.118	0.062	0.1876	0.0031	0.78116	5.33049	0.0880838	0.0816	0.0015	1153	20	1108	17	1239	34	1239	34	0.0406137	0.0274415	0.428937
Zo03-2-15Apr16-4E - 39	2.062	0.038	0.192	0.0025	0.74639	5.20833	0.0678168	0.07771	0.00074	1136	13	1132.2	13	1139	19	1139	19	0.0033563	0.0166813	0.317259
Zo03-2-15Apr16-4E - 4	1.595	0.027	0.1577	0.0022	0.59117	6.34115	0.0884625	0.07298	0.00081	969.6	10	943.7	12	1012	22	1012	22	0.0274452	0.0217391	0.268293
Zo03-2-15Apr16-4E - 40	0.3259	0.01	0.0442	0.0013	0.33583	22.6244	0.665425	0.0534	0.0013	286.3	7.9	279	8	343	56	279	8	0.0261649	0.0286738	0.743802
Zo03-2-15Apr16-4E - 41	0.306	0.012	0.04351	0.00095	0.40994	22.9832	0.501817	0.0516	0.0014	271.3	9.4	274.6	5.9	261	64	274.6	5.9	-0.0120175	0.0214858	0.673607
Zo03-2-15Apr16-4E - 42	0.3065	0.011	0.04118	0.00064	0.22975	24.2836	0.377405	0.054	0.0018	271.3	8.2	260.1	4	362	76	260.1	4	0.0430604	0.0153787	0.301531
Zo03-2-15Apr16-4E - 43	1.595	0.026	0.1574	0.0025	0.6511	6.35324	0.100909	0.07311	0.0006	968	10	942	14	1020	16	1020	16	0.0276008	0.0156863	0.488235
Zo03-2-15Apr16-4E - 44	0.308	0.016	0.04143	0.001	0.59575	24.1371	0.5826	0.0549	0.002	272	13	261.7	6.2	402	82	261.7	6.2	0.039358	0.0236912	0.763483
Zo03-2-15Apr16-4E - 45	2.119	0.054	0.1978	0.0034	0.65144	5.05561	0.0869013	0.0779	0.0014	1154	18	1164	18	1147	34	1147	34	-0.00859107	0.0296425	0.452536
Zo03-2-15Apr16-4E - 46	1.662	0.028	0.1629	0.0021	0.23727	6.13874	0.0791366	0.07353	0.00092	993.8	11	972.6	12	1028	25	1028	25	0.0217972	0.0243191	0.190939
Zo03-2-15Apr16-4E - 47	1.701	0.048	0.1616	0.0028	0.81059	6.18812	0.10722	0.0763	0.0017	1008	18	966	15	1100	47	1100	47	0.0434783	0.0427273	0.737892
Zo03-2-15Apr16-4E - 48	0.325	0.013	0.0448	0.00089	0.62362	22.3214	0.443439	0.0526	0.0015	285.5	9.7	282.5	5.5	305	68	282.5	5.5	0.0106195	0.019469	0.559838
Zo03-2-15Apr16-4E - 49	0.3099	0.0074	0.04309	0.00054	0.1302	23.2072	0.290831	0.0527	0.0012	274	5.8	271.9	3.4	308	51	271.9	3.4	0.00772343	0.0125046	0.410593
Zo03-2-15Apr16-4E - 5	0.3062	0.0077	0.0422	0.00057	0.30796	23.6967	0.320074	0.05276	0.00099	271.1	6	266.4	3.5	324	46	266.4	3.5	0.0176426	0.0131381	0.621963
Zo03-2-15Apr16-4E - 50	0.32	0.013	0.0434	0.0011	0.51038	23.0415	0.584001	0.054	0.002	281.6	10	273.6	6.9	363	84	273.6	6.9	0.0292398	0.0252193	0.488065
Zo03-2-15Apr16-4E - 51	1.807	0.035	0.1804	0.0029	0.91306	5.54324	0.0891097	0.0723	0.00048	1048	13	1069	16	994	13	994	13	-0.0196445	0.0130785	0.118236
Zo03-2-15Apr16-4E - 52	2.119	0.034	0.1949	0.0028	0.52608	5.13084	0.0737113	0.07889	0.00097	1154.8	11	1148	15	1168	24	1168	24	0.00592334	0.0205479	0.479283
Zo03-2-15Apr16-4E - 53	2.111	0.038	0.1946	0.0033	0.70081	5.13875	0.0871421	0.07862	0.0008	1152	12	1146	18	1162	20	1162	20	0.0052356	0.0172117	0.304573
Zo03-2-15Apr16-4E - 54	0.3224	0.0097	0.04416	0.0007	0.34618	22.6449	0.358955	0.0529	0.0013	283.5	7.5	278.6	4.3	327	57	278.6	4.3	0.0175879	0.0154343	0.603977
Zo03-2-15Apr16-4E - 55	0.3126	0.0095	0.04309	0.00084	0.14705	23.2072	0.452404	0.0527	0.0017	276.1	7.4	272	5.2	312	70	272	5.2	0.0150735	0.0191176	0.471665
Zo03-2-15Apr16-4E - 56	0.3318	0.0097	0.04598	0.00072	0.30569	21.7486	0.340561	0.0516	0.0011	290.7	7.4	289.8	4.4	261	51	289.8	4.4	0.00310559	0.0151829	0.865807
Zo03-2-15Apr16-4E - 57	0.312	0.012	0.04434	0.00058	0.021357	22.553	0.29501	0.051	0.002	275.5	9.4	279.7	3.6	229	84	279.7	3.6	-0.0150161	0.0128709	0.608748
Zo03-2-15Apr16-4E - 58	0.3128	0.0064	0.04305	0.00064	0.34968	23.2288	0.345329	0.0531	0.001	276.3	4.9	271.7	3.9	329	44	271.7	3.9	0.0169304	0.0143541	0.503968
Zo03-2-15Apr16-4E - 59	0.3133	0.007	0.04326	0.00072	0.24877	23.116	0.384733	0.0526	0.0011	276.6	5.4	273	4.4	317	43	273	4.4	0.0131868	0.0161172	0.800224
Zo03-2-15Apr16-4E - 6	0.306	0.0081	0.0434	0.00064	0.54771	23.0415	0.339782	0.05129	0.0009	271	6.2	273.9	3.9	250	40	273.9	3.9	-0.0105878	0.0142388	0.495674
Zo03-2-15Apr16-4E - 60	0.3272	0.0089	0.04465	0.00074	0.16305	22.3964	0.371184	0.0537	0.0013	288.3	6.6	281.6	4.6	351	56	281.6	4.6	0.0237926	0.0163352	0.821918
Zo03-2-15Apr16-4E - 61	0.3094	0.0074	0.04201	0.00083	0.55573	23.8039	0.470298	0.0538	0.0011	273.6	5.8	265.3	5.1	361	45	265.3	5.1	0.0312853	0.0192235	0.741107
Zo03-2-15Apr16-4E - 62	1.818	0.028	0.1752	0.002	0.20566	5.70776	0.0651571	0.07509	0.00082	1051.9	10	1040.8	11	1074	21	1074	21	0.0106649	0.0195531	0.351295
Zo03-2-15Apr16-4E - 64	0.3058	0.0082	0.0426	0.00063	0.46966	23.4742	0.347153	0.0515	0.0011	270.8	6.4	268.9	3.9	261	51	268.9	3.9	0.00706582	0.0145035	0.311273
Zo03-2-15Apr16-4E - 66	1.809	0.038	0.1746	0.0024	0.40394	5.72738	0.0787268	0.0755	0.0011	1051	15	1037.6	13	1078	30	1078	30	0.0129144	0.0278293	0.388112
Zo03-2-15Apr16-4E - 67	1.583	0.045	0.156	0.0034	0.86645	6.41026	0.139711	0.07406	0.00093	966	17	934	19	1042	25	1042	25	0.0342612	0.0239923	0.439768
Zo03-2-15Apr16-4E - 68	2.236	0.045	0.2027	0.0027	-0.090355	4.9334	0.0657138	0.0802	0.0016	1192	14	1190	14	1197	40	1197	40	0.00168067	0.0334169	0.421793
Zo03-2-15Apr16-4E - 69	2.314	0.041	0.2078	0.0027	0.52539	4.81232	0.0625277	0.08115	0.00086	1216.3	13	1217	14	1224	21	1224	21	-0.000575185	0.0171569	0.298122
Zo03-2-15Apr16-4E - 7	2.09	0.031	0.191	0.0023	0.47264	5.2356	0.0630465	0.07906	0.00077	1145.2	10	1126.7	12	1172	19	1172	19	0.0164196	0.0162116	0.437401
Zo03-2-15Apr16-4E - 70	0.3119	0.0091	0.04347	0.00067	0.37963	23.0044	0.354565	0.0527	0.0012	275.5	7	274.3	4.2	309	54	274.3	4.2	0.00437477	0.0153117	0.606293
Zo03-2-15Apr16-4E - 71	0.3115	0.0094	0.04287	0.00062	0.30259	23.3263	0.337353	0.0526	0.0014	275.2	7.3	270.6	3.9	311	64	270.6	3.9	0.0169993	0.0144124	0.553809
Zo03-2-15Apr16-4E - 72	1.942	0.037	0.1838	0.0028	0.78629	5.4407	0.0828833	0.07671	0.00091	1095	13	1088	15	1113	24	1113	24	0.00643382	0.0215633	0.411637
Zo03-2-15Apr16-4E - 73	1.578	0.024	0.1591	0.002	0.34767	6.28536	0.0790114	0.07191	0.00083	961.5	9.5	952	11	982	24	982	24	0.00997899	0.0244399	0.110135
Zo03-2-15Apr16-4E - 74	0.324	0.013	0.0459	0.00071	0.20912	21.7865	0.337002	0.0511	0.0019	284	10	289.3	4.4	233	82	289.3	4.4	-0.0183201	0.0152091	0.573805
Zo03-2-15Apr16-4E - 75	0.682	0.014	0.08531	0.0012	0.55952	11.722	0.164885	0.0584	0.001	527.6	8.3	527.7	7.4	543	37	527.7	7.4	-0.000189502	0.0140231	1.42587
Zo03-2-15Apr16-4E - 76	0.3885	0.011	0.0538	0.0015	0.87679	18.5874	0.518235	0.05259	0.00074	333.1	7.8	338	8.9	309	32	338	8.9	-0.014497	0.0263314	1.39458
Zo03-2-15Apr16-4E - 77	0.3928	0.0095	0.0534	0.0012	0.80283	18.7266	0.420822	0.05297	0.00049	336.3	6.9	335.2	7.1	333	24	335.2	7.1	0.00328162	0.0211814	1.7021
Zo03-2-15Apr16-4E - 78	1.956	0.045	0.1776	0.0027	0.56897	5.63063	0.0856008	0.0794	0.0015	1100	15	1054	15	1180	36	1180	36	0.0436433	0.0305085	0.235417
Zo03-2-15Apr16-4E - 8	0.3531	0.0087	0.0487	0.0011	0.73493	20.5339	0.463804	0.0524	0.0011	307	6.5	306.5	6.8	299	50	306.5	6.8	0.00163132	0.022186	0.924863
Zo03-2-15Apr16-4E - 80	0.3129	0.008	0.04325	0.00063	0.24161	23.1214	0.336797	0.0519	0.0013	277.3	6.4	273	3.9	294	55	273	3.9	0.0157509	0.0142857	0.62201
Zo03-2-15Apr16-4E - 81	0.2945	0.0061	0.03988	0.00082	0.34869	25.0752	0.515589	0.0539	0.0012	262.1	4.8	252.1	5.1	362	48	252.1	5.1	0.0396668	0.0202301	0.31634
Zo03-2-15Apr16-4E - 82	0.3202	0.0096	0.04354	0.00084	0.70012	22.9674	0.443101	0.053	0.0014	281.9	7.4	274.8	5.2	327	59	274.8	5.2	0.025837	0.0189229	0.795918
Zo03-2-15Apr16-4E - 83	1.95	0.033	0.1841	0.0027	0.54941	5.43183	0.0796629	0.07733	0.00085	1098.3	11	1089	15	1128	22	1128	22	0.00853994	0.0195035	0.415635
Zo03-2-15Apr16-4E - 84	1.648	0.035	0.1636	0.003	0.58858	6.11247	0.112087	0.07189	0.00084	989	13	977	17	982	24	982	24	0.0122825	0.0244399	0.318909
Zo03-2-15Apr16-4E - 85	0.3214	0.01	0.04393	0.00071	0.46458	22.7635	0.367905	0.053	0.0014	282.8	7.9	277.2	4.4	333	56	277.2	4.4	0.020202	0.015873	0.804516
Zo03-2-15Apr16-4E - 86	0.3242	0.01	0.0428	0.00068	0.063264	23.3645	0.371211	0.0551	0.0019	285	8.1	270.1	4.2	445	78	270.1	4.2	0.0551648	0.0155498	0.591433
Zo03-2-15Apr16-4E - 87	1.86	0.03	0.176	0.003	0.5419	5.68182	0.0968492	0.07641	0.00086	1066.7	11	1045	16	1105	23	1105	23	0.0207656	0.0208145	0.268862
Zo03-2-15Apr16-4E - 88	2.151	0.098	0.199	0.0091	0.95026	5.02513	0.229792	0.0785	0.0013	1164	32	1169	49	1158	33	1158	33	-0.00427716	0.0284974	0.296016
Zo03-2-15Apr16-4E - 89	0.3247	0.01	0.04331	0.00079	0.32721	23.0894	0.421163	0.0551	0.0013	285.4	8.1	273.3	4.9	411	55	273.3	4.9	0.0442737	0.017929	0.517978
Zo03-2-15Apr16-4E - 9	12.93	0.2	0.4958	0.0067	0.79427	2.01694	0.027256	0.1889	0.001	2676	15	2599	28	2732.4	8.8	2732.4	8.8	0.0296268	0.00322061	1.43421
Zo03-2-15Apr16-4E - 90	0.3002	0.0075	0.04232	0.00057	0.33727	23.6295	0.318261	0.0517	0.0012	266.4	5.9	267.2	3.5	264	52	267.2	3.5	-0.00299401	0.0130988	0.286846
Zo03-2-15Apr16-4E - 91	0.3078	0.0094	0.04275	0.00073	0.43124	23.3918	0.399439	0.0528	0.0014	272.3	7.3	269.9	4.5	315	58	269.9	4.5	0.00889218	0.0166728	0.626275
Zo03-2-15Apr16-4E - 92	0.2833	0.0061	0.03842	0.00069	0.79222	26.0281	0.467449	0.05384	0.00098	253.2	4.8	243	4.3	363	41	243	4.3	0.0419753	0.0176955	0.227198
Zo03-2-15Apr16-4E - 93	0.36	0.0073	0.04946	0.00067	0.54666	20.2184	0.273884	0.05239	0.00087	312.2	5.5	311.8	4.3	298	38	311.8	4.3	0.00128287	0.0137909	0.3083
Zo03-2-15Apr16-4E - 94	0.306	0.011	0.0431	0.00091	0.1449	23.2019	0.489877	0.0521	0.0019	270.8	8.3	272	5.7	309	80	272	5.7	-0.00441176	0.0209559	0.939024
Zo03-2-15Apr16-4E - 96	0.315	0.014	0.04423	0.00064	0.1841	22.6091	0.327149	0.0518	0.0022	277	11	279	4	261	94	279	4	-0.00716846	0.0143369	0.636469
Zo03-2-15Apr16-4E - 97	0.338	0.011	0.04659	0.00076	0.48753	21.4638	0.350129	0.0524	0.0015	295.7	8.1	293.5	4.7	295	66	293.5	4.7	0.00749574	0.0160136	0.407821
Zo03-2-15Apr16-4E - 98	0.3171	0.0093	0.0436	0.00077	0.40502	22.9358	0.405058	0.0522	0.0012	279.5	7.2	275.1	4.8	292	52	275.1	4.8	0.0159942	0.0174482	0.821031
Zo03-2-15Apr16-4E - 99	2.171	0.039	0.1978	0.0025	0.56658	5.05561	0.063898	0.07936	0.00093	1171.3	12	1163.2	13	1180	23	1180	23	0.00696355	0.0194915	0.334243
Zo03S-15Apr16-4E	0.312	0.016	0.04318	0.00068	0.093923	23.1589	0.364707	0.0524	0.0016	275	13	272.5	4.2	295	69	272.5	4.2	0.00917431	0.0154128	0.809735
Zo03S-15Apr16-4E_1	0.309	0.016	0.04325	0.00067	0.1556	23.1214	0.358181	0.0516	0.0013	273	13	272.9	4.1	260	56	272.9	4.1	0.000366435	0.0150238	0.486119
Zo03S-15Apr16-4E_10	2.04	0.14	0.192	0.0024	-0.10098	5.20833	0.0651042	0.0764	0.0016	1121	46	1132	13	1109	39	1109	39	-0.00971731	0.0351668	0.459052
Zo03S-15Apr16-4E_101	0.335	0.03	0.04684	0.00085	0.3429	21.3493	0.387423	0.0518	0.0031	292	23	295.1	5.2	260	130	295.1	5.2	-0.0105049	0.0176211	0.469488
Zo03S-15Apr16-4E_103	1.923	0.07	0.1809	0.0026	0.55031	5.52792	0.0794504	0.07794	0.001	1087	24	1072	14	1145	26	1145	26	0.0139925	0.0227074	0.303829
Zo03S-15Apr16-4E_104	2.195	0.095	0.2001	0.0021	-0.10874	4.9975	0.0524475	0.07852	0.0011	1176	29	1175.5	12	1159	27	1159	27	0.000425351	0.0232959	0.55
Zo03S-15Apr16-4E_105	2.4	0.12	0.2154	0.0026	-0.04037	4.64253	0.0560379	0.0813	0.0013	1238	36	1258	14	1227	32	1227	32	-0.0158983	0.0260799	0.343871
Zo03S-15Apr16-4E_107	2.05	0.11	0.1917	0.0031	0.76232	5.21648	0.0843563	0.0788	0.0015	1127	37	1131	17	1164	39	1164	39	-0.00353669	0.0335052	0.217778
Zo03S-15Apr16-4E_108	1.99	0.073	0.1879	0.0031	0.10961	5.32198	0.0878028	0.07804	0.0011	1110	24	1110	17	1147	27	1147	27	0	0.0235397	0.464894
Zo03S-15Apr16-4E_109	2.286	0.083	0.2048	0.0026	0.24407	4.88281	0.0619888	0.08123	0.0011	1210	27	1201	14	1226	26	1226	26	0.00749376	0.0212072	0.314765
Zo03S-15Apr16-4E_11	1.886	0.1	0.1794	0.0024	0.51455	5.57414	0.0745704	0.0761	0.0014	1071	35	1064	13	1094	37	1094	37	0.00657895	0.0338208	0.42
Zo03S-15Apr16-4E_110	0.3141	0.011	0.04467	0.00072	0.1408	22.3864	0.360828	0.0522	0.0012	277.1	8.8	281.7	4.4	288	53	281.7	4.4	-0.0163294	0.0156195	0.716475
Zo03S-15Apr16-4E_111	0.324	0.018	0.04541	0.00055	0.42428	22.0216	0.266723	0.0514	0.0015	284	14	286.3	3.4	249	64	286.3	3.4	-0.00803353	0.0118757	0.435229
Zo03S-15Apr16-4E_112	0.369	0.038	0.04939	0.00097	-0.074395	20.247	0.397643	0.0498	0.0022	316	28	310.8	6	195	98	310.8	6	0.016731	0.019305	0.698454
Zo03S-15Apr16-4E_113	0.328	0.019	0.04459	0.00069	0.036941	22.4266	0.347036	0.0538	0.0017	287	15	281.2	4.2	351	70	281.2	4.2	0.0206259	0.014936	0.675634
Zo03S-15Apr16-4E_115	1.81	0.18	0.1672	0.0056	0.074192	5.98086	0.200316	0.0751	0.0018	1032	62	1002	31	1075	49	1075	49	0.0299401	0.0455814	0.696602
Zo03S-15Apr16-4E_116	2.21	0.13	0.1989	0.0029	0.062937	5.02765	0.0733041	0.079	0.0017	1178	41	1169	16	1169	43	1169	43	0.00769889	0.0367836	0.824089
Zo03S-15Apr16-4E_117	1.644	0.061	0.1556	0.003	0.2099	6.42674	0.123909	0.07682	0.0012	985	23	932	17	1115	31	1115	31	0.056867	0.0278027	0.299178
Zo03S-15Apr16-4E_118	2.59	0.12	0.2253	0.0027	-0.085707	4.43853	0.0531914	0.08475	0.0014	1300	32	1310	14	1308	31	1308	31	-0.00763359	0.0237003	0.460193
Zo03S-15Apr16-4E_119	0.323	0.024	0.04443	0.00063	0.15833	22.5073	0.319145	0.0527	0.0018	283	18	280.3	3.9	319	81	280.3	3.9	0.00963254	0.0139137	0.570552
Zo03S-15Apr16-4E_12	2.252	0.1	0.2002	0.0027	-0.13533	4.995	0.0673652	0.07938	0.0012	1194	32	1176	14	1184	28	1184	28	0.0153061	0.0236486	0.601379
Zo03S-15Apr16-4E_120	0.29	0.012	0.03999	0.00083	0.15873	25.0063	0.519009	0.0518	0.0012	259.7	9.1	252.8	5.2	283	54	252.8	5.2	0.0272943	0.0205696	0.23165
Zo03S-15Apr16-4E_121	0.315	0.017	0.04488	0.00066	0.009697	22.2816	0.327671	0.0527	0.0022	281	15	283	4.1	302	93	283	4.1	-0.00706714	0.0144876	0.525606
Zo03S-15Apr16-4E_122	0.307	0.013	0.04312	0.00059	0.20203	23.1911	0.317318	0.0538	0.0016	271.2	9.8	272.2	3.7	362	69	272.2	3.7	-0.00367377	0.0135929	0.656904
Zo03S-15Apr16-4E_123	0.318	0.024	0.04502	0.00085	-0.24434	22.2124	0.41938	0.0525	0.0027	279	18	283.9	5.2	290	110	283.9	5.2	-0.0172596	0.0183163	0.525988
Zo03S-15Apr16-4E_124	0.331	0.023	0.04389	0.00055	-0.12259	22.7842	0.285517	0.0521	0.0019	292	18	276.9	3.4	317	97	276.9	3.4	0.0545323	0.0122788	0.777301
Zo03S-15Apr16-4E_125	0.313	0.026	0.04233	0.00058	-0.31504	23.6239	0.323692	0.0573	0.0031	276	20	267.2	3.6	520	110	267.2	3.6	0.0329341	0.0134731	0.577277
Zo03S-15Apr16-4E_126	0.311	0.017	0.04459	0.00063	0.16155	22.4266	0.316859	0.0526	0.0018	274	14	281.2	3.9	301	76	281.2	3.9	-0.0256046	0.0138691	0.717297
Zo03S-15Apr16-4E_127	0.332	0.016	0.04678	0.0007	0.26955	21.3767	0.319873	0.0516	0.0012	291	12	294.7	4.3	263	53	294.7	4.3	-0.0125551	0.0145911	0.860465
Zo03S-15Apr16-4E_128	0.329	0.02	0.0452	0.00086	-0.20209	22.1239	0.420941	0.0531	0.002	288	16	285	5.3	321	85	285	5.3	0.0105263	0.0185965	0.842105
Zo03S-15Apr16-4E_13	0.335	0.016	0.0457	0.00052	0.045562	21.8818	0.248984	0.0529	0.0019	293	12	288.1	3.2	309	79	288.1	3.2	0.017008	0.0111073	0.518467
Zo03S-15Apr16-4E_130	0.312	0.012	0.04332	0.00058	-0.29196	23.084	0.309066	0.05216	0.001	275	9.5	273.4	3.6	289	45	273.4	3.6	0.00585223	0.0131675	0.784053
Zo03S-15Apr16-4E_131	0.3081	0.011	0.04402	0.00058	-0.052644	22.7169	0.299315	0.0523	0.0011	272.5	8.3	277.7	3.6	294	48	277.7	3.6	-0.0187252	0.0129636	0.698962
Zo03S-15Apr16-4E_132	1.581	0.073	0.1634	0.0046	0.43625	6.11995	0.172287	0.07046	0.0012	960	29	975	25	940	36	940	36	-0.0153846	0.0382979	0.437725
Zo03S-15Apr16-4E_134	0.365	0.016	0.05083	0.00059	0.087718	19.6734	0.228356	0.0526	0.0013	315	12	319.6	3.6	303	56	319.6	3.6	-0.014393	0.0112641	0.517834
Zo03S-15Apr16-4E_136	1.779	0.066	0.1717	0.0021	0.27606	5.82411	0.0712326	0.0733	0.0014	1036	24	1021.4	11	1019	39	1019	39	0.0142941	0.0382728	0.850329
Zo03S-15Apr16-4E_138	0.316	0.02	0.04375	0.00066	-0.1547	22.8571	0.344816	0.0525	0.0019	278	16	276	4.1	293	81	276	4.1	0.00724638	0.0148551	0.51359
Zo03S-15Apr16-4E_139	1.41	0.11	0.1444	0.0055	0.79648	6.92521	0.263772	0.0745	0.0016	905	44	869	31	1059	40	1059	40	0.0414269	0.0377715	0.232311
Zo03S-15Apr16-4E_14	0.327	0.018	0.04506	0.00057	-0.021962	22.1926	0.280732	0.0534	0.0014	287	14	284.1	3.5	336	61	284.1	3.5	0.0102077	0.0123196	0.343791
Zo03S-15Apr16-4E_141	0.331	0.024	0.04509	0.0009	0.41284	22.1779	0.442672	0.0512	0.0019	289	18	284.3	5.5	270	88	284.3	5.5	0.0165318	0.0193458	0.540948
Zo03S-15Apr16-4E_142	0.324	0.032	0.04274	0.00071	-0.074315	23.3973	0.388677	0.0533	0.0025	283	24	269.8	4.4	322	100	269.8	4.4	0.0489251	0.0163084	0.588621
Zo03S-15Apr16-4E_143	0.334	0.024	0.04517	0.00088	0.19701	22.1386	0.431303	0.0526	0.0028	292	18	284.8	5.4	310	120	284.8	5.4	0.0252809	0.0189607	0.764599
Zo03S-15Apr16-4E_144	0.331	0.022	0.04514	0.00061	0.015294	22.1533	0.299369	0.0519	0.0013	289	17	284.6	3.7	273	56	284.6	3.7	0.0154603	0.0130007	0.602703
Zo03S-15Apr16-4E_145	0.277	0.015	0.03871	0.00072	-0.05586	25.8331	0.480492	0.0507	0.0018	248	12	244.8	4.5	245	83	244.8	4.5	0.0130719	0.0183824	0.830882
Zo03S-15Apr16-4E_146	0.293	0.024	0.04081	0.00072	0.10387	24.5038	0.432314	0.0515	0.0026	259	19	257.8	4.5	250	110	257.8	4.5	0.00465477	0.0174554	0.554892
Zo03S-15Apr16-4E_147	0.325	0.036	0.04491	0.00085	-0.018648	22.2668	0.421437	0.0511	0.0023	283	27	283.2	5.2	260	110	283.2	5.2	-0.000706215	0.0183616	0.585714
Zo03S-15Apr16-4E_148	0.299	0.015	0.04081	0.00063	0.19865	24.5038	0.378275	0.0537	0.0014	265	12	257.8	3.9	352	62	257.8	3.9	0.0279286	0.015128	0.681818
Zo03S-15Apr16-4E_149	2.037	0.083	0.1908	0.0034	0.13535	5.24109	0.0933947	0.08174	0.0011	1126	27	1125	19	1239	26	1239	26	0.000888889	0.0209847	0.30076
Zo03S-15Apr16-4E_150	1.626	0.047	0.1649	0.0039	0.040828	6.06428	0.143424	0.07252	0.00093	982	19	983	21	1000	26	1000	26	-0.00101729	0.026	0.185009
Zo03S-15Apr16-4E_151	1.743	0.086	0.1717	0.002	-0.14354	5.82411	0.0678406	0.0726	0.0011	1031	32	1021.5	11	1005	31	1005	31	0.00930005	0.0308458	0.232549
Zo03S-15Apr16-4E_153	2.17	0.14	0.1959	0.0023	0.30259	5.10465	0.059932	0.07968	0.0013	1164	46	1153.2	13	1188	31	1188	31	0.00936524	0.0260943	0.405609
Zo03S-15Apr16-4E_154	0.565	0.019	0.07365	0.0011	-0.031289	13.5777	0.20279	0.05633	0.0011	454	12	458.1	6.3	468	47	458.1	6.3	-0.00895001	0.0137525	0.726257
Zo03S-15Apr16-4E_155	1.92	0.12	0.1782	0.0019	-0.30351	5.61167	0.0598326	0.0758	0.0018	1086	42	1057	10	1089	49	1089	49	0.0274361	0.0449954	0.387349
Zo03S-15Apr16-4E_157	2.19	0.14	0.2002	0.0025	0.2418	4.995	0.0623752	0.07948	0.0012	1170	44	1176.3	13	1187	32	1187	32	-0.00535578	0.0269587	0.361416
Zo03S-15Apr16-4E_159	0.366	0.021	0.05017	0.0011	0.071049	19.9322	0.437023	0.0528	0.0012	321	13	315.5	6.5	317	52	315.5	6.5	0.0174326	0.0206022	0.236
Zo03S-15Apr16-4E_16	1.637	0.09	0.1671	0.002	-0.064631	5.98444	0.0716271	0.0734	0.0014	980	34	996.1	11	1022	39	1022	39	-0.016163	0.0381605	0.198073
Zo03S-15Apr16-4E_160	0.2911	0.011	0.04142	0.0007	0.60165	24.1429	0.408017	0.0516	0.0012	259.2	8.8	261.6	4.3	272	52	261.6	4.3	-0.00917431	0.0164373	0.392819
Zo03S-15Apr16-4E_161	0.265	0.012	0.0373	0.0022	0.48669	26.8097	1.58127	0.055	0.0013	238.7	9.4	236	14	408	52	236	14	0.0114407	0.059322	0.256897
Zo03S-15Apr16-4E_162	0.323	0.017	0.0452	0.00055	0.21728	22.1239	0.269207	0.0521	0.0013	284	13	285	3.4	285	59	285	3.4	-0.00350877	0.0119298	0.704182
Zo03S-15Apr16-4E_164	0.275	0.015	0.03854	0.0005	0.042444	25.9471	0.336625	0.0516	0.00092	247	11	243.8	3.1	265	41	243.8	3.1	0.0131255	0.0127153	0.144792
Zo03S-15Apr16-4E_165	1.903	0.078	0.1795	0.002	0.43462	5.57103	0.0620728	0.07711	0.001	1084	26	1064.1	11	1124	26	1124	26	0.0187012	0.0231317	0.565502
Zo03S-15Apr16-4E_166	0.316	0.015	0.04458	0.00061	-0.07634	22.4316	0.306937	0.0527	0.0013	278	12	281.1	3.8	316	57	281.1	3.8	-0.0110281	0.0135183	0.767403
Zo03S-15Apr16-4E_167	1.686	0.088	0.1637	0.0019	0.10227	6.10874	0.0709016	0.0727	0.0013	999	32	977.2	11	1014	36	1014	36	0.0223086	0.035503	0.421105
Zo03S-15Apr16-4E_168	0.319	0.022	0.04513	0.0006	-0.05581	22.1582	0.294592	0.0519	0.0013	280	17	284.5	3.7	282	61	284.5	3.7	-0.0158172	0.0130053	0.551542
Zo03S-15Apr16-4E_17	1.75	0.15	0.1691	0.0021	0.10974	5.91366	0.0734399	0.0745	0.0016	1016	53	1007	12	1051	43	1051	43	0.00893744	0.0409134	0.249821
Zo03S-15Apr16-4E_170	0.335	0.017	0.04602	0.00075	0.45122	21.7297	0.354134	0.0517	0.0014	293	14	290	4.6	266	61	290	4.6	0.0103448	0.0158621	0.632479
Zo03S-15Apr16-4E_171	0.3096	0.011	0.0438	0.0015	0.36616	22.8311	0.781885	0.05727	0.0011	273.7	8.4	276.1	9.6	498	43	276.1	9.6	-0.0086925	0.03477	0.105966
Zo03S-15Apr16-4E_172	2.13	0.17	0.1976	0.0027	0.19542	5.06073	0.0691496	0.0775	0.0017	1158	56	1162	15	1131	44	1131	44	-0.00344234	0.0389036	0.528037
Zo03S-15Apr16-4E_173	2.056	0.1	0.1875	0.0027	0.16682	5.33333	0.0768	0.0779	0.0013	1131	34	1108	15	1143	34	1143	34	0.0207581	0.0297463	0.293987
Zo03S-15Apr16-4E_174	2.03	0.078	0.1911	0.0032	0.37688	5.23286	0.0876251	0.07903	0.001	1123	26	1127	17	1172	26	1172	26	-0.00354925	0.0221843	0.379638
Zo03S-15Apr16-4E_175	0.331	0.02	0.04475	0.00066	-0.0024115	22.3464	0.329578	0.0529	0.0012	289	15	282.2	4.1	321	54	282.2	4.1	0.0240964	0.0145287	0.448675
Zo03S-15Apr16-4E_176	0.339	0.016	0.04521	0.00063	-0.21075	22.119	0.308228	0.0528	0.002	296	12	285	3.9	310	87	285	3.9	0.0385965	0.0136842	0.369611
Zo03S-15Apr16-4E_177	0.314	0.022	0.0445	0.00066	-0.083099	22.4719	0.333291	0.0523	0.0021	279	17	280.7	4.1	297	90	280.7	4.1	-0.00605629	0.0146063	0.621677
Zo03S-15Apr16-4E_178	1.857	0.1	0.1747	0.0025	0.26027	5.7241	0.0819133	0.0743	0.0015	1062	37	1038	14	1047	42	1047	42	0.0231214	0.0401146	0.303395
Zo03S-15Apr16-4E_179	1.84	0.11	0.1787	0.0021	-0.19839	5.59597	0.0657613	0.074	0.0014	1057	38	1059.8	12	1040	37	1040	37	-0.00264201	0.0355769	0.308955
Zo03S-15Apr16-4E_18	0.3025	0.011	0.04299	0.00054	-0.075774	23.2612	0.292186	0.05275	0.0011	268.1	8.8	271.3	3.3	314	46	271.3	3.3	-0.0117951	0.0121637	0.775093
Zo03S-15Apr16-4E_180	0.323	0.029	0.04563	0.00068	0.17191	21.9154	0.326594	0.051	0.0033	283	22	287.7	4.2	230	140	287.7	4.2	-0.0163365	0.0145985	0.575221
Zo03S-15Apr16-4E_182	1.666	0.082	0.1659	0.002	0.047283	6.02773	0.072667	0.0721	0.0014	997	32	989.2	11	986	39	986	39	0.00788516	0.0395538	0.325417
Zo03S-15Apr16-4E_183	1.866	0.093	0.1776	0.0021	0.51671	5.63063	0.0665784	0.07546	0.0011	1065	32	1054	11	1080	29	1080	29	0.0104364	0.0268519	0.286813
Zo03S-15Apr16-4E_184	0.3226	0.012	0.04493	0.00058	-0.069677	22.2568	0.287313	0.0519	0.0011	283.7	9	283.3	3.6	284	46	283.3	3.6	0.00141193	0.0127074	0.53271
Zo03S-15Apr16-4E_185	2.358	0.1	0.205	0.0026	0.26053	4.87805	0.0618679	0.08175	0.0011	1227	30	1202	14	1239	26	1239	26	0.0207987	0.0209847	0.33682
Zo03S-15Apr16-4E_186	1.97	0.1	0.1859	0.0022	-0.090711	5.37924	0.0636596	0.07684	0.0012	1100	35	1100.3	12	1115	32	1115	32	-0.000272653	0.0286996	0.153911
Zo03S-15Apr16-4E_187	0.328	0.022	0.04643	0.00093	0.25629	21.5378	0.431405	0.0521	0.0017	288	17	292.5	5.7	283	73	292.5	5.7	-0.0153846	0.0194872	0.797721
Zo03S-15Apr16-4E_188	0.322	0.012	0.0449	0.00064	0.12049	22.2717	0.317459	0.0521	0.0013	282.9	9.5	283.1	4	283	57	283.1	4	-0.000706464	0.0141293	0.654922
Zo03S-15Apr16-4E_189	1.96	0.13	0.1852	0.0027	-0.21911	5.39957	0.0787194	0.0789	0.0021	1097	43	1095	15	1165	51	1165	51	0.00182648	0.0437768	0.372932
Zo03S-15Apr16-4E_190	0.335	0.025	0.04421	0.00066	-0.0022978	22.6193	0.337678	0.0527	0.0025	292	19	278.9	4.1	300	100	278.9	4.1	0.0469702	0.0147006	1.16092
Zo03S-15Apr16-4E_191	2.352	0.1	0.2059	0.0026	0.00080957	4.85673	0.0613283	0.07984	0.0011	1230	30	1207	14	1196	30	1196	30	0.0190555	0.0250836	0.370122
Zo03S-15Apr16-4E_193	1.991	0.085	0.1852	0.0022	0.4395	5.39957	0.0641417	0.0785	0.0012	1110	29	1095.3	12	1158	31	1158	31	0.013421	0.0267703	0.416196
Zo03S-15Apr16-4E_195	0.332	0.019	0.04625	0.00051	0.29481	21.6216	0.238422	0.0532	0.0013	290	14	291.4	3.1	347	53	291.4	3.1	-0.00480439	0.0106383	0.481188
Zo03S-15Apr16-4E_196	0.326	0.019	0.04625	0.0006	0.17123	21.6216	0.280497	0.0523	0.0017	286	14	291.4	3.7	290	71	291.4	3.7	-0.0185312	0.0126973	0.538088
Zo03S-15Apr16-4E_197	1.78	0.11	0.1721	0.0023	-0.21592	5.81058	0.0776544	0.0736	0.0017	1042	41	1023	12	1028	48	1028	48	0.0185728	0.0466926	0.404523
Zo03S-15Apr16-4E_198	2.21	0.12	0.2036	0.0037	0.17492	4.91159	0.0892578	0.0785	0.0014	1192	41	1194	20	1156	36	1156	36	-0.00167504	0.0311419	0.795139
Zo03S-15Apr16-4E_2	2.12	0.13	0.1944	0.0029	-0.0086928	5.14403	0.0767371	0.0779	0.0016	1157	41	1145	15	1141	39	1141	39	0.0104803	0.0341805	0.341483
Zo03S-15Apr16-4E_21	1.593	0.079	0.1601	0.0021	-0.17807	6.2461	0.0819288	0.07252	0.0012	964	31	957.3	12	999	33	999	33	0.00699885	0.033033	0.557547
Zo03S-15Apr16-4E_23	0.341	0.034	0.04714	0.00084	-0.23355	21.2134	0.378007	0.0529	0.0026	295	26	296.9	5.2	310	110	296.9	5.2	-0.00639946	0.0175143	0.571713
Zo03S-15Apr16-4E_24	1.649	0.057	0.1646	0.0024	0.26274	6.07533	0.0885832	0.07322	0.0011	988	22	982	13	1019	29	1019	29	0.00610998	0.0284593	0.632161
Zo03S-15Apr16-4E_26	1.9	0.12	0.1752	0.0029	0.30808	5.70776	0.0944778	0.07468	0.0013	1080	41	1041	16	1063	36	1063	36	0.037464	0.0338664	0.212883
Zo03S-15Apr16-4E_27	0.376	0.023	0.05082	0.00071	0.02812	19.6773	0.274909	0.0531	0.0015	327	16	319.6	4.3	324	65	319.6	4.3	0.0231539	0.0134543	0.748285
Zo03S-15Apr16-4E_3	1.92	0.11	0.1853	0.0023	-0.018654	5.39665	0.0669849	0.0764	0.0015	1083	38	1095.6	13	1102	39	1102	39	-0.0115005	0.0353902	0.289839
Zo03S-15Apr16-4E_30	0.341	0.022	0.04739	0.00082	0.27623	21.1015	0.365124	0.0521	0.0018	297	17	298.5	5.1	292	78	298.5	5.1	-0.00502513	0.0170854	0.894309
Zo03S-15Apr16-4E_31	0.324	0.013	0.04463	0.00056	0.22086	22.4065	0.281148	0.05219	0.0011	286.2	9.7	281.5	3.5	289	49	281.5	3.5	0.0166963	0.0124334	0.673171
Zo03S-15Apr16-4E_32	1.97	0.12	0.1874	0.0024	0.15618	5.33618	0.0683395	0.078	0.0019	1102	41	1107	13	1144	47	1144	47	-0.00451671	0.0410839	0.625
Zo03S-15Apr16-4E_33	0.316	0.017	0.0451	0.00059	0.089004	22.1729	0.290067	0.0525	0.0015	280	13	284.4	3.6	298	66	284.4	3.6	-0.0154712	0.0126582	0.645669
Zo03S-15Apr16-4E_34	0.294	0.014	0.04064	0.00076	0.57204	24.6063	0.460157	0.0527	0.0012	261	11	256.8	4.7	310	53	256.8	4.7	0.0163551	0.0183022	0.930041
Zo03S-15Apr16-4E_35	0.317	0.014	0.04513	0.00079	0.2818	22.1582	0.387879	0.05196	0.0011	279.1	11	284.5	4.9	281	48	284.5	4.9	-0.0189807	0.0172232	0.420744
Zo03S-15Apr16-4E_4	1.765	0.076	0.1751	0.002	0.11976	5.71102	0.0652316	0.07382	0.00097	1036	29	1040.3	11	1036	26	1036	26	-0.00413342	0.0250965	0.531429
Zo03S-15Apr16-4E_40	0.33	0.013	0.04484	0.00076	0.049955	22.3015	0.377992	0.05331	0.001	289.6	10	282.7	4.7	346	46	282.7	4.7	0.0244075	0.0166254	0.203827
Zo03S-15Apr16-4E_41	0.362	0.017	0.05057	0.00062	-0.11908	19.7746	0.242441	0.0531	0.0013	313	14	318	3.8	337	53	318	3.8	-0.0157233	0.0119497	0.524454
Zo03S-15Apr16-4E_43	2.23	0.12	0.1986	0.0024	0.21218	5.03525	0.0608489	0.0796	0.0014	1192	35	1167.6	13	1184	35	1184	35	0.0208976	0.0295608	0.667476
Zo03S-15Apr16-4E_44	0.316	0.017	0.04426	0.00073	0.30149	22.5938	0.372649	0.0526	0.0017	279	13	279.2	4.5	303	74	279.2	4.5	-0.000716332	0.0161175	0.582192
Zo03S-15Apr16-4E_45	0.315	0.016	0.0446	0.00055	0.17842	22.4215	0.276499	0.0532	0.0016	277	12	281.3	3.4	328	67	281.3	3.4	-0.0152862	0.0120867	0.667699
Zo03S-15Apr16-4E_48	0.324	0.032	0.04493	0.00065	-0.090328	22.2568	0.321989	0.05	0.0021	284	24	283.3	4	190	93	283.3	4	0.00247088	0.0141193	0.283333
Zo03S-15Apr16-4E_49	1.819	0.068	0.1766	0.0028	0.3641	5.66251	0.0897794	0.07414	0.001	1050	24	1049	15	1045	28	1045	28	0.000953289	0.0267943	0.283989
Zo03S-15Apr16-4E_5	1.614	0.058	0.1629	0.0022	0.29711	6.13874	0.082905	0.07305	0.0011	974	23	972.8	12	1014	30	1014	30	0.00123355	0.0295858	0.419061
Zo03S-15Apr16-4E_50	0.322	0.019	0.04538	0.00072	-0.19177	22.0361	0.349626	0.052	0.0016	282	15	286.1	4.4	277	68	286.1	4.4	-0.0143307	0.0153792	0.61287
Zo03S-15Apr16-4E_51	0.316	0.016	0.04318	0.00047	0.1882	23.1589	0.252077	0.0519	0.0014	279	12	272.5	2.9	292	61	272.5	2.9	0.0238532	0.0106422	0.935286
Zo03S-15Apr16-4E_52	0.337	0.026	0.0458	0.00068	0.013874	21.8341	0.324174	0.0503	0.0019	293	20	288.7	4.2	202	83	288.7	4.2	0.0148944	0.014548	0.820896
Zo03S-15Apr16-4E_53	1.95	0.11	0.1848	0.0026	0.18246	5.41126	0.0761324	0.0768	0.0013	1092	37	1093	14	1114	34	1114	34	-0.000914913	0.0305206	0.464539
Zo03S-15Apr16-4E_54	2.23	0.15	0.2028	0.0026	-0.16171	4.93097	0.0632175	0.0789	0.0015	1186	47	1191	14	1178	41	1178	41	-0.00419815	0.0348048	0.396537
Zo03S-15Apr16-4E_55	2.082	0.1	0.187	0.0026	0.37508	5.34759	0.0743516	0.07726	0.0011	1146	35	1105	14	1127	29	1127	29	0.0371041	0.025732	0.221698
Zo03S-15Apr16-4E_56	2.11	0.15	0.1895	0.0028	-0.17312	5.27704	0.0779722	0.0772	0.0015	1150	47	1119	15	1124	40	1124	40	0.0277033	0.0355872	0.341055
Zo03S-15Apr16-4E_58	0.337	0.017	0.04674	0.00065	0.21397	21.395	0.297534	0.0523	0.0014	294	13	294.5	4	292	60	294.5	4	-0.00169779	0.0135823	0.375691
Zo03S-15Apr16-4E_6	0.343	0.028	0.04508	0.00069	0.037803	22.1828	0.339532	0.0517	0.0022	297	21	284.2	4.2	273	95	284.2	4.2	0.0450387	0.0147783	0.522828
Zo03S-15Apr16-4E_60	0.302	0.02	0.04336	0.0006	-0.078806	23.0627	0.319134	0.0524	0.0018	267	16	273.6	3.7	306	81	273.6	3.7	-0.0241228	0.0135234	0.463504
Zo03S-15Apr16-4E_61	0.307	0.013	0.04214	0.00064	-0.035888	23.7304	0.360405	0.0532	0.0012	273.4	10	266.1	3.9	331	51	266.1	3.9	0.0274333	0.0146561	0.636691
Zo03S-15Apr16-4E_62	0.321	0.023	0.04366	0.00055	0.34545	22.9043	0.288533	0.0512	0.0017	281	18	276.1	3.4	242	75	276.1	3.4	0.0177472	0.0123144	0.823178
Zo03S-15Apr16-4E_63	0.337	0.028	0.04391	0.00063	-0.15147	22.7739	0.326749	0.0517	0.0023	293	21	277	3.9	258	96	277	3.9	0.0577617	0.0140794	0.557484
Zo03S-15Apr16-4E_64	2.05	0.12	0.1893	0.003	-0.080069	5.28262	0.0837182	0.0803	0.0012	1128	38	1118	16	1204	29	1204	29	0.00894454	0.0240864	0.239474
Zo03S-15Apr16-4E_65	2.328	0.091	0.2124	0.0026	0.077786	4.7081	0.0576321	0.0803	0.0014	1233	33	1242	14	1204	34	1204	34	-0.00724638	0.0282392	0.244495
Zo03S-15Apr16-4E_66	2.14	0.15	0.1954	0.0031	0.0032224	5.11771	0.0811919	0.08042	0.0012	1157	47	1151	17	1213	34	1213	34	0.00521286	0.0280297	0.407025
Zo03S-15Apr16-4E_67	1.706	0.075	0.1716	0.0022	0.056763	5.82751	0.0747116	0.07316	0.0012	1008	28	1021	12	1022	32	1022	32	-0.0127326	0.0313112	0.224342
Zo03S-15Apr16-4E_69	0.36	0.018	0.04876	0.0005	-0.044954	20.5086	0.210302	0.0523	0.0012	312	13	306.9	3.1	300	53	306.9	3.1	0.0166178	0.010101	1.09612
Zo03S-15Apr16-4E_71	1.455	0.067	0.1482	0.0031	0.13329	6.74764	0.141145	0.0722	0.001	914	27	891	17	991	29	991	29	0.0258137	0.0292634	0.174503
Zo03S-15Apr16-4E_72	0.333	0.017	0.04696	0.00062	-0.066809	21.2947	0.281148	0.0531	0.0015	291	13	295.9	3.8	322	68	295.9	3.8	-0.0165596	0.0128422	0.639655
Zo03S-15Apr16-4E_73	0.321	0.016	0.04519	0.00058	-0.029808	22.1288	0.284016	0.0527	0.0014	284	13	284.9	3.6	319	64	284.9	3.6	-0.003159	0.012636	0.546855
Zo03S-15Apr16-4E_74	0.342	0.02	0.04544	0.00074	0.40089	22.007	0.358389	0.0569	0.0016	298	15	286.5	4.6	479	64	286.5	4.6	0.0401396	0.0160558	0.710227
Zo03S-15Apr16-4E_77	2.51	0.15	0.2211	0.0026	-0.023894	4.52284	0.0531858	0.08442	0.0014	1269	44	1288	15	1306	29	1306	29	-0.0147516	0.0222052	0.385613
Zo03S-15Apr16-4E_79	0.325	0.014	0.044	0.00052	0.20958	22.7273	0.268595	0.0525	0.0016	288	12	277.6	3.2	316	67	277.6	3.2	0.037464	0.0115274	0.645177
Zo03S-15Apr16-4E_8	2.35	0.12	0.2051	0.0027	0.27262	4.87567	0.0641848	0.0813	0.0015	1231	38	1203	14	1232	35	1232	35	0.0232751	0.0284091	0.825683
Zo03S-15Apr16-4E_81	0.271	0.012	0.03822	0.00048	0.27975	26.1643	0.328594	0.0528	0.0013	243.5	9.4	241.8	3	315	57	241.8	3	0.0070306	0.0124069	0.412256
Zo03S-15Apr16-4E_83	0.309	0.023	0.0441	0.00063	-0.13603	22.6757	0.323939	0.0513	0.0016	272	18	278.2	3.9	258	71	278.2	3.9	-0.0222861	0.0140187	0.45852
Zo03S-15Apr16-4E_84	0.32	0.014	0.0452	0.00068	0.11257	22.1239	0.332837	0.0534	0.0014	281.6	11	285	4.2	338	60	285	4.2	-0.0119298	0.0147368	0.682943
Zo03S-15Apr16-4E_86	0.313	0.023	0.04385	0.00062	0.24159	22.805	0.322443	0.051	0.0019	275	18	276.7	3.9	232	81	276.7	3.9	-0.00614384	0.0140947	0.771465
Zo03S-15Apr16-4E_87	1.634	0.074	0.1618	0.0022	0.36398	6.18047	0.0840361	0.073	0.0015	981	29	967	12	1011	42	1011	42	0.0144778	0.041543	0.369761
Zo03S-15Apr16-4E_88	0.322	0.021	0.04555	0.00065	-0.24951	21.9539	0.313283	0.0525	0.0015	282	16	287.2	4	310	61	287.2	4	-0.0181058	0.0139276	0.516729
Zo03S-15Apr16-4E_89	0.275	0.014	0.03702	0.00085	0.1138	27.0124	0.62022	0.0538	0.002	247	11	234.3	5.3	350	82	234.3	5.3	0.054204	0.0226206	0.631427
Zo03S-15Apr16-4E_9	1.784	0.088	0.1756	0.003	0.38183	5.69476	0.0972909	0.0748	0.0011	1036	32	1043	17	1062	30	1062	30	-0.00671141	0.0282486	0.430972
Zo03S-15Apr16-4E_90	0.338	0.016	0.04681	0.0011	0.17863	21.363	0.502014	0.0519	0.0015	295	12	294.9	6.6	279	66	294.9	6.6	0.000339098	0.0223805	0.548002
Zo03S-15Apr16-4E_91	0.326	0.022	0.04319	0.00075	0.51478	23.1535	0.402064	0.0546	0.002	286	17	272.6	4.6	384	85	272.6	4.6	0.0491563	0.0168745	0.488007
Zo03S-15Apr16-4E_92	0.327	0.017	0.04463	0.00084	-0.27031	22.4065	0.421721	0.0522	0.0024	287	13	281.4	5.2	280	100	281.4	5.2	0.0199005	0.018479	0.472623
Zo03S-15Apr16-4E_93	2.26	0.11	0.203	0.003	0.21299	4.92611	0.0727996	0.0799	0.0014	1194	34	1192	16	1193	34	1193	34	0.00167785	0.0284996	1.09259
Zo03S-15Apr16-4E_94	0.338	0.027	0.04426	0.00065	0.29214	22.5938	0.331811	0.0527	0.0021	294	20	279.2	4	301	87	279.2	4	0.0530086	0.0143266	0.812816
Zo03S-15Apr16-4E_95	1.708	0.083	0.1686	0.002	0.30464	5.9312	0.0703582	0.07216	0.001	1008	31	1004.1	11	989	29	989	29	0.00388408	0.0293225	1.35928
Zo03S-15Apr16-4E_96	0.325	0.02	0.04465	0.00064	0.56715	22.3964	0.321024	0.0533	0.0018	285	15	281.6	3.9	341	79	281.6	3.9	0.0120739	0.0138494	0.721057
Zo03S-15Apr16-4E_97	0.298	0.013	0.04181	0.00056	0.28619	23.9177	0.320352	0.053	0.0015	264.2	10	264	3.5	336	60	264	3.5	0.000757576	0.0132576	1.19841
Zo03S-15Apr16-4E_98	0.307	0.018	0.04366	0.00086	0.37353	22.9043	0.45116	0.051	0.0018	274	14	275.5	5.3	232	77	275.5	5.3	-0.00544465	0.0192377	0.992522

[truncated: 5 more sheets: Men1, Men2, Vel1, Vel2, Vel3]
